# Supplementary material for: Development and Verification of an Immune-Based Gene Signature for Risk Stratification and Immunotherapeutic Efficacy Assessment in Gastric Cancer
Source: PubMed Central journal article supplement (PMC8602949; doi:10.1155/2021/4251763), 2021-11-11
Supplement: 4251763.f1.pdf [file 4251763.f1.pdf]

Supplementary table 1. 1001 overlapped immune-related genes in TCGA, GSE66229 and Imvigor210 datasets.

AZGP1

B2M

CALR

CANX

CD1A

CD1C

CD1D

CD1E

CD4

CD8A

CD8B

CD74

CREB1

CTSB

CTSE

CTSS

FCER1G

FCGRT

PDIA3

HFE

HLA-A

HLA-B

HLA-C

HLA-DMA

HLA-DMB

HLA-DOA

HLA-DOB

HLA-DPA1

HLA-DPB1

HLA-DQA1

HLA-DQB1

HLA-DRA

HLA-DRB1

HLA-E

HLA-F

HLA-G

MR1

HSPA1A

HSPA1L

HSPA2

HSPA4

HSPA5

HSPA6

HSPA8

HSP90AA1

HSP90AB1

ICAM1

IFNG

KIR2DL4

KLRC1

KLRD1  
LTA  
CIITA  
MICA  
MICB  
NFYA  
NFYB  
NFYC  
LGMN  
PSMB8  
PSMC1  
PSMC2  
PSMC3  
PSMC4  
PSMC5  
PSMC6  
PSMD1  
PSMD2  
PSMD3  
PSMD4  
PSMD5  
PSMD7  
PSMD8  
PSMD10  
PSMD11  
PSMD13  
PSME1  
RELB  
RFX5  
RFXAP  
TAP1  
TAP2  
TAPBP  
THBS1  
KLRC4  
AP3B1  
RFXANK  
PSMD6  
PSME3  
PSMD14  
IFI30  
PROCR  
ADRM1  
TRPC4AP  
CD209  
ERAP1  
TAPBPL  
ERAP2  
ULBP3  
ULBP1  
RAET1E  
UBR1  
PDIA2

HAMP  
PI3  
CAMP  
PPBP  
REG3G  
CXCL14  
CXCL16  
SLPI  
CXCL10  
CXCL9  
CXCL5  
CXCL11  
CXCL6  
CXCL1  
CXCL12  
CXCL13  
CXCL2  
PF4  
XCL1  
CXCL3  
CCL13  
DEFB1  
CCL8  
TMSB10  
DEFA6  
DEFA5  
DEFA4  
LCN2  
LCN1  
BPI  
S100A9  
S100A8  
S100A12  
CCR10  
PENK  
MMP12  
LEAP2  
SFTPD  
PTGDS  
TMSB4X  
PGLYRP1  
ZC3HAV1  
S100B  
S100A13  
S100A6  
SERPIND1  
S100P  
S100A7  
PGLYRP3  
S100A10  
S100A2  
LCN12  
PGLYRP4

S100A11  
S100A5  
S100A3  
S100A1  
LMBR1L  
S100A7A  
COLEC12  
TMSB4Y  
S100A14  
S100A16  
ZC3HAV1L  
IFNAR1  
AZU1  
S100G  
TINAGL1  
IFNGR1  
SLC22A17  
WFIKKN1  
WFDC2  
IL6  
TGFB1  
PF4V1  
MMP9  
TLR4  
A2M  
NFKB1  
APOBEC3G  
FABP6  
NOD2  
RBP1  
TLR2  
SLC40A1  
PLAU  
IL1B  
PAEP  
MUC5AC  
PLTP  
MX1  
DDX58  
IRF3  
LBP  
RBP4  
NOX4  
LTF  
RBP5  
FABP5  
FABP3  
FABP2  
FABP4  
R3HDML  
OASL  
CRABP2  
CRABP1

RBP7  
DUOX1  
OBP2B  
RBP2  
CETP  
C8G  
PI15  
NOX1  
APOD  
ORM1  
TNF  
CTSG  
PRTN3  
MAPK1  
PML  
CYBB  
ISG20  
BCL3  
ISG20L2  
DUOX2  
TLR3  
TFRC  
IFIH1  
LRP1  
TRIM5  
GDF15  
NEDD4  
ADIPOQ  
STAT3  
STAT1  
SOCS3  
SEMG1  
TNFSF10  
CCL20  
SOCS1  
RNASEL  
IRF1  
IL15  
APOBEC3F  
CD40  
TLR7  
PIA  
ZYG  
NLRX1  
PGC  
VEGFA  
IKBKE  
ISG15  
DHX58  
TNFAIP3  
TFR2  
MUC4  
F2R

ELN  
MAPT  
LYZ  
CCL5  
CYLD  
CST4  
CSRP1  
MAPK14  
JUN  
ITGAV  
IRF5  
TLR8  
GNLY  
CD81  
EIF2AK2  
APOM  
CACYBP  
NOD1  
MAPK8  
MAPK3  
BST2  
BPHL  
PLA2G2A  
GRN  
PDGFRA  
GNAI1  
WNT5A  
FURIN  
ADAR  
TYK2  
TRAF3  
TPM2  
NEO1  
AHNAK  
TLR1  
TK2  
PRDX2  
MX2  
FGF2  
FGA  
TCF7L2  
F2RL1  
MSR1  
NFKBIZ  
LMBR1  
SRC  
MPO  
ELAVL1  
ROBO3  
SP1  
SOD1  
DLL4  
ECD

SLC11A1  
DMBT1  
SKIV2L  
SEMG2  
DES  
DCK  
DAXX  
TNFRSF10A  
TNFRSF10B  
EED  
CCL4  
LIMS1  
TMPRSS6  
SPINK5  
MARCO  
BECN1  
TNFSF11  
CSK  
KCNH2  
JUND  
JAK1  
CLDN4  
CCL28  
RNASE3  
IRF7  
IREB2  
ILK  
IL18  
LTB4R  
MASP2  
TRIM27  
RELA  
IL7R  
IL1A  
PTX3  
IFNAR2  
SYTL1  
APOBEC3C  
DDX17  
PTGS2  
CD40LG  
CD14  
MASP1  
PROC  
MAP2K2  
MAP2K1  
NDRG1  
IRF9  
TRIM22  
LANCL1  
HMOX1  
HMGB1  
RNASE7

ABCC4  
HGF  
HDAC1  
PLSCR1  
BACH2  
TANK  
PIK3CG  
ARRB1  
RSAD2  
TBK1  
PDGFRB  
PDCD1  
PCSK2  
PCSK1  
ARG2  
AQP9  
FASLG  
APOH  
BIRC5  
ANXA6  
VIM  
VCAM1  
PRDX1  
GBP2  
ALB  
SLC29A3  
OAS1  
AGER  
UNC93B1  
TNFSF4  
ACTA1  
ACO1  
SERPINA3  
CCL15  
CCL16  
CCL19  
CCL18  
CCL17  
CCL26  
CCL22  
CCR3  
CCR7  
CCR8  
CCL2  
CCL21  
CCL7  
CCL3  
CCL11  
CCR5  
CCL23  
CCL25  
CCR1  
CCL24



CXCR4  
CXCR6  
CCR4  
PTK2B  
CDH1  
LTBP1  
IL10  
PPARG  
FGR  
MIF  
CRP  
JAK2  
PTK2  
PTGDR  
CD86  
HCK  
VDR  
OLR1  
TXK  
RNASE2  
CD79A  
CD79B  
LYN  
SYK  
BTK  
BLNK  
VAV3  
VAV1  
VAV2  
RAC1  
RAC2  
RAC3  
PPP3CA  
PPP3CB  
PPP3CC  
PPP3R1  
CHP2  
NFAT5  
NFATC1  
NFATC2  
NFATC3  
NFATC4  
HRAS  
KRAS  
NRAS  
FOS  
CARD11  
BCL10  
MALT1  
CHUK  
IKBKB  
IKBKG  
NFKBIA

NFKBIB  
NFKBIE  
CD19  
CR2  
PIK3R5  
PIK3R1  
PIK3R2  
PIK3R3  
PIK3CA  
PIK3CB  
PIK3CD  
AKT3  
AKT1  
AKT2  
GSK3B  
INPP5D  
CD22  
CD72  
PTPN6  
FCGR2B  
RASGRP3  
PLCG2  
IFITM1  
C3  
C5  
CKLF  
CMA1  
CX3CL1  
CXCL17  
EDN1  
EDN2  
EDN3  
FGF10  
PROK2  
SAA1  
SBDS  
SEMA3A  
SEMA3B  
SEMA3C  
SEMA3D  
SEMA3E  
SEMA3F  
SEMA3G  
SEMA4A  
SEMA4B  
SEMA4C  
SEMA4D  
SEMA4F  
SEMA4G  
SEMA5A  
SEMA5B  
SEMA6A  
SEMA6B

SEMA6C  
SEMA6D  
SEMA7A  
SLIT1  
SLIT2  
TNC  
C5AR1  
CMKLR1  
CX3CR1  
CXCR3  
CYSLTR1  
CYSLTR2  
EDNRA  
EDNRB  
FPR1  
FPR2  
GPR17  
LTB4R2  
PLAUR  
PLXNA1  
PLXNA2  
PLXNA3  
PLXNB1  
PLXNB2  
PLXNB3  
PLXNC1  
PLXND1  
PTAFR  
ROBO1  
ROBO2  
XCR1  
ADM  
ADM2  
AGT  
AMH  
ANGPTL7  
APLN  
AREG  
ARTN  
BDNF  
BMP1  
BMP2  
BMP3  
BMP4  
BMP5  
BMP6  
BMP7  
BMP8A  
BMP8B  
BTC  
CALCA  
CAT  
CCK

CD320  
CD70  
CGA  
CHGA  
CHGB  
CLCF1  
CLEC11A  
CMTM1  
CMTM2  
CMTM3  
CMTM4  
CMTM6  
CMTM7  
CMTM8  
CNTF  
CSF1  
CSF2  
CSF3  
CSPG5  
CTF1  
DKK1  
EBI3  
EREG  
ESM1  
FAM3B  
FAM3C  
FAM3D  
FGF1  
FGF12  
FGF13  
FGF18  
FGF19  
FGF20  
FGF3  
FGF7  
FGF9  
FLT3LG  
GAL  
GAST  
GCG  
GDF10  
GDF11  
GDF9  
GDNF  
GHRH  
GHRL  
GIP  
GKN1  
GMFB  
GMFG  
GNRH1  
GNRH2  
GPI

GREM1  
GREM2  
GRP  
GUCA2A  
HBEGF  
HDGF  
IGF1  
IGF2  
IL11  
IL12A  
IL16  
IL17B  
IL17C  
IL17D  
IL19  
IL1RN  
IL23A  
IL24  
IL32  
IL33  
IL6ST  
IL7  
INHA  
INHBA  
INHBB  
INSL3  
INSL6  
JAG1  
JAG2  
KITLG  
KL  
LEFTY1  
LIF  
LRSAM1  
LTB  
LTBP3  
LTBP4  
MDK  
MIA  
MLN  
NAMPT  
NDP  
NENF  
NGF  
NMB  
NPPC  
NPY  
NRG1  
NRG2  
NRG4  
NRTN  
NTF3  
NTS

NUDT6  
OGN  
OSGIN1  
OSM  
OXT  
PDGFA  
PDGFB  
PDGFC  
PDGFD  
PDGFRL  
PGF  
PNOC  
POMC  
PPY  
PSPN  
PTHLH  
PTN  
PYY  
RABEP1  
RABEP2  
REG1A  
RETN  
RETNLB  
SCG2  
SCGB3A1  
SCT  
SECTM1  
SLURP1  
SPP1  
SST  
STC1  
STC2  
TAC1  
TDGF1  
TGFA  
TGFB2  
TGFB3  
THPO  
TNFRSF11B  
TNFSF12  
TNFSF13  
TNFSF13B  
TNFSF14  
TNFSF15  
TNFSF18  
TNFSF8  
TNFSF9  
TOR2A  
TSLP  
TXLNA  
UCN  
UCN2  
UCN3

UTS2  
VEGFB  
VEGFC  
VGF  
VIP  
ACVR1B  
ACVR1C  
ACVR2A  
ACVR2B  
ACVRL1  
ADCYAP1R1  
ADIPOR1  
ADIPOR2  
ADRB1  
ADRB2  
AGTR1  
AMHR2  
ANGPT1  
ANGPTL1  
ANGPTL2  
ANGPTL3  
ANGPTL4  
ANGPTL6  
AR  
AVPR1A  
AVPR2  
BMPR1A  
BMPR1B  
BMPR2  
BRD8  
C3AR1  
CALCRL  
CNTFR  
CRIM1  
CRLF1  
CRLF2  
CRLF3  
CSF1R  
CSF2RA  
CSF2RB  
CSF3R  
EGFR  
ENG  
EPOR  
ESR1  
ESR2  
ESRRA  
ESRRG  
FGFR1  
FGFR2  
FGFR3  
FGFR4  
FGFRL1

FLT1  
FLT3  
FLT4  
GALR2  
GHR  
GIPR  
GLP1R  
GLP2R  
HNF4A  
HNF4G  
HTR3A  
IFNGR2  
IGF1R  
IGF2R  
IL10RA  
IL10RB  
IL11RA  
IL12RB1  
IL12RB2  
IL13RA1  
IL13RA2  
IL15RA  
IL17RA  
IL17RB  
IL17RC  
IL17RD  
IL17RE  
IL18R1  
IL18RAP  
IL1R1  
IL1R2  
IL1RAP  
IL1RL1  
IL1RL2  
IL20RA  
IL20RB  
IL21R  
IL22RA1  
IL27RA  
IL2RA  
IL2RB  
IL2RG  
IL31RA  
IL3RA  
IL4R  
IL6R  
IL9R  
INSR  
KDR  
LEPR  
LGR4  
LGR5  
LGR6



LIFR  
LTBR  
MC1R  
MET  
MLNR  
MPL  
MTNR1A  
NGFR  
NPR1  
NPR3  
NR0B2  
NR1D1  
NR1D2  
NR1H2  
NR1H3  
NR1H4  
NR1I2  
NR1I3  
NR2C1  
NR2C2  
NR2F1  
NR2F2  
NR2F6  
NR3C1  
NR3C2  
NR4A1  
NR4A2  
NR4A3  
NR5A2  
NR6A1  
NRP1  
NRP2  
OGFR  
OPRL1  
OSMR  
OXTR  
PGR  
PGRMC2  
PPARA  
PPARD  
PRLR  
PTGER1  
PTGER2  
PTGER3  
PTGER4  
PTGFR  
PTH2R  
RARA  
RARB  
RARG  
RORA  
RORC  
RXRA

RXRB  
RXRG  
SCTR  
SDC1  
SDC2  
SDC3  
SDC4  
SORT1  
SSTR1  
SSTR2  
SSTR5  
TACR1  
TEK  
TGFB1  
TGFB2  
TGFB3  
THRA  
THRB  
TIE1  
TNFRSF10C  
TNFRSF10D  
TNFRSF11A  
TNFRSF12A  
TNFRSF13B  
TNFRSF13C  
TNFRSF14  
TNFRSF17  
TNFRSF18  
TNFRSF19  
TNFRSF1A  
TNFRSF1B  
TNFRSF21  
TNFRSF25  
TNFRSF4  
TNFRSF8  
TNFRSF9  
TUBB3  
VIPR1  
VIPR2  
PTPN11  
ICAM2  
ITGAL  
ITGB2  
PAK1  
TYROBP  
LCK  
FCGR3A  
FCGR3B  
NCR1  
NCR3  
CD247  
ZAP70  
LCP2

PLCG1  
SH3BP2  
FYN  
SHC2  
SHC4  
SHC3  
SHC1  
GRB2  
SOS1  
SOS2  
ARAF  
BRAF  
RAF1  
HCST  
CD48  
CD244  
PRKCA  
PRKCG  
SH2D1B  
SH2D1A  
FAS  
GZMB  
PRF1  
CASP3  
BID  
CD3D  
CD3E  
CD3G  
PTPRC  
ITK  
TEC  
NCK1  
NCK2  
GRAP2  
PAK2  
PAK3  
PAK4  
RHOA  
CDC42  
CD28  
ICOS  
MAP3K8  
MAP3K14  
CTLA4  
CBLC  
CBL  
CBLB  
CDK4  
RASGRP1  
PDK1  
PRKCQ
