# Supplementary material for: Development and Verification of an Immune-Based Gene Signature for Risk Stratification and Immunotherapeutic Efficacy Assessment in Gastric Cancer
Source: PubMed Central journal article supplement (PMC8602949; doi:10.1155/2021/4251763), 2021-11-11
Supplement: 4251763.f2.pdf [file 4251763.f2.pdf]

Supplementary table 2. Differentially expressed immune-related genes in gastric cancer from TCGA dataset.

| ID       | logFC        | AveExpr     | t            | P.Value     |
|----------|--------------|-------------|--------------|-------------|
| GKN1     | -5.600673996 | 4.009008516 | -7.432419052 | 6.30E-13    |
| DES      | -3.505058771 | 6.547346183 | -5.726476932 | 1.99E-08    |
| SST      | -3.103550283 | 2.274941101 | -7.168328108 | 3.58E-12    |
| CHGA     | -3.0417453   | 2.60690724  | -6.509759938 | 2.21E-10    |
| DEFA5    | -2.871228105 | 1.425728883 | -6.213112301 | 1.28E-09    |
| RBP2     | -2.421188816 | 2.257667791 | -5.317107969 | 1.74E-07    |
| PGC      | -2.203205743 | 7.169707894 | -2.797649082 | 0.005390955 |
| FABP4    | -2.170654628 | 2.323219205 | -7.089240447 | 5.96E-12    |
| DEFA6    | -2.166843534 | 1.321899253 | -5.083035078 | 5.66E-07    |
| CXCL17   | -2.136153403 | 4.802137287 | -3.905350941 | 0.000110055 |
| GIP      | -2.018670901 | 0.723804257 | -9.405243549 | 3.78E-19    |
| ANGPTL1  | -2.002785883 | 1.810724762 | -6.927426629 | 1.67E-11    |
| CCL21    | -1.905972009 | 5.456172996 | -4.962043476 | 1.03E-06    |
| VIP      | -1.835108363 | 1.337808301 | -5.9880636   | 4.65E-09    |
| ESRRG    | -1.78222298  | 0.921569583 | -10.27738331 | 3.42E-22    |
| CNTFR    | -1.728676507 | 1.573454771 | -6.215276278 | 1.26E-09    |
| GHRL     | -1.695787041 | 1.846499313 | -5.88872384  | 8.13E-09    |
| PTN      | -1.674534367 | 3.164446254 | -7.22490535  | 2.47E-12    |
| OGN      | -1.632634752 | 3.196337471 | -3.994860353 | 7.68E-05    |
| S100B    | -1.614943451 | 2.651992723 | -7.505428379 | 3.87E-13    |
| S100A8   | -1.596109273 | 4.606517398 | -3.698218578 | 0.000246763 |
| LTF      | -1.506145565 | 3.810054486 | -3.022972556 | 0.002660667 |
| PENK     | -1.434532241 | 1.150572117 | -5.254741535 | 2.39E-07    |
| SLURP1   | -1.375316869 | 0.650359626 | -4.326566643 | 1.91E-05    |
| FABP2    | -1.351996178 | 1.518307663 | -3.922863203 | 0.000102622 |
| S100A12  | -1.333802964 | 1.944882309 | -4.831626079 | 1.92E-06    |
| NPPC     | -1.318046359 | 0.691432059 | -8.69109311  | 8.77E-17    |
| SLC22A17 | -1.309267644 | 3.006891877 | -5.753803505 | 1.71E-08    |
| S100G    | -1.301184948 | 0.752862778 | -6.551271621 | 1.72E-10    |
| FAM3B    | -1.300854446 | 3.522594171 | -3.556844354 | 0.000419309 |
| NPY      | -1.284607894 | 0.956931344 | -5.760277447 | 1.65E-08    |
| TPM2     | -1.28067254  | 7.14913488  | -4.161353405 | 3.86E-05    |
| CHGB     | -1.255060716 | 1.422450761 | -3.892408821 | 0.000115873 |
| ADRB2    | -1.242723216 | 1.117085028 | -9.409708801 | 3.65E-19    |
| PCSK2    | -1.238811544 | 0.478911981 | -8.491863517 | 3.81E-16    |
| CTSG     | -1.232932669 | 1.08025588  | -6.253968397 | 1.01E-09    |
| PTGDS    | -1.228801065 | 5.755978073 | -3.757721206 | 0.000196409 |
| HSPA2    | -1.227758452 | 2.606685206 | -5.796377948 | 1.36E-08    |
| GHR      | -1.212710399 | 1.396894007 | -6.789754594 | 3.97E-11    |
| GREM2    | -1.211520737 | 1.824702744 | -4.632223519 | 4.87E-06    |
| GCG      | -1.170389432 | 0.49716454  | -5.481207546 | 7.41E-08    |
| CMA1     | -1.158598638 | 0.672675325 | -7.562561885 | 2.63E-13    |
| CSRP1    | -1.14050923  | 6.121975544 | -5.069759139 | 6.05E-07    |
| CXCL12   | -1.13799746  | 4.289708005 | -4.553664123 | 6.97E-06    |
| AGTR1    | -1.104996844 | 1.086639514 | -4.874393998 | 1.56E-06    |
| EDN3     | -1.072329103 | 1.884552631 | -3.892834027 | 0.000115678 |
| TNFRSF17 | -1.071215952 | 2.00667008  | -4.312243439 | 2.03E-05    |
| APOD     | -1.045348852 | 5.98067481  | -2.412757657 | 0.016271651 |
| ANGPTL7  | -1.043813448 | 0.696992094 | -6.874286296 | 2.34E-11    |

|          |              |             |              |             |
|----------|--------------|-------------|--------------|-------------|
| RXRG     | -1.030542678 | 0.420134674 | -10.58711967 | 2.61E-23    |
| TUBB3    | 1.001433015  | 1.393675715 | 6.262883005  | 9.58E-10    |
| FGFRL1   | 1.003076969  | 4.82749629  | 4.850613081  | 1.75E-06    |
| AQP9     | 1.003080849  | 1.954023052 | 4.250589945  | 2.64E-05    |
| NRP1     | 1.003190551  | 4.710082449 | 6.056711748  | 3.15E-09    |
| TAPBP    | 1.003377182  | 7.798934192 | 7.905150842  | 2.51E-14    |
| C3AR1    | 1.006011646  | 3.702610038 | 4.61865905   | 5.18E-06    |
| ULBP3    | 1.008521072  | 2.114941597 | 5.365616125  | 1.35E-07    |
| LTB      | 1.014249444  | 3.993751457 | 3.894297246  | 0.000115007 |
| PSME3    | 1.014263968  | 6.61213738  | 10.28748187  | 3.15E-22    |
| SRC      | 1.0143323    | 6.150180371 | 7.093839029  | 5.79E-12    |
| EIF2AK2  | 1.017724739  | 4.6759311   | 8.119777654  | 5.56E-15    |
| EDN1     | 1.022228544  | 3.904157275 | 4.856647496  | 1.70E-06    |
| HLA-F    | 1.027820015  | 6.630450231 | 5.347007815  | 1.49E-07    |
| CCR1     | 1.031241821  | 3.056560124 | 5.34597214   | 1.50E-07    |
| RNASE2   | 1.036459999  | 1.724214295 | 5.334984677  | 1.59E-07    |
| PTK2     | 1.036552756  | 5.630557966 | 9.705273638  | 3.54E-20    |
| CXCL2    | 1.049359804  | 4.909463376 | 3.653049944  | 0.000292853 |
| ITGB2    | 1.049928665  | 4.561917125 | 4.405419487  | 1.35E-05    |
| PIK3CB   | 1.050960109  | 4.380720418 | 8.690030585  | 8.84E-17    |
| TMSB10   | 1.055632604  | 11.64962343 | 7.933626989  | 2.06E-14    |
| NR5A2    | 1.057593886  | 2.469645745 | 4.78553653   | 2.39E-06    |
| TINAGL1  | 1.057620338  | 5.65382835  | 6.636818424  | 1.02E-10    |
| IL27RA   | 1.060012032  | 3.550768603 | 6.550675617  | 1.73E-10    |
| CANX     | 1.06008905   | 8.215424261 | 9.792173824  | 1.77E-20    |
| PSMD1    | 1.066365495  | 6.631339197 | 11.14510668  | 2.27E-25    |
| TNFRSF4  | 1.067356039  | 2.659514059 | 6.832571844  | 3.04E-11    |
| NFYA     | 1.06756672   | 4.282743791 | 8.537102182  | 2.73E-16    |
| GMFB     | 1.075486128  | 4.228037441 | 9.589544456  | 8.87E-20    |
| CMTM1    | 1.076654104  | 2.139743304 | 9.066490021  | 5.18E-18    |
| CCL4     | 1.077118072  | 3.639242289 | 4.591275473  | 5.87E-06    |
| CD86     | 1.07949623   | 3.019476809 | 5.770986899  | 1.56E-08    |
| PROC     | 1.084044638  | 1.929361883 | 4.683644373  | 3.84E-06    |
| LCK      | 1.088457845  | 3.773605755 | 4.664755405  | 4.19E-06    |
| PTPN6    | 1.09066661   | 5.319877092 | 8.165335977  | 4.02E-15    |
| HSPA5    | 1.097706096  | 8.382301278 | 9.894971415  | 7.74E-21    |
| MIF      | 1.097741513  | 7.302654939 | 6.896596533  | 2.03E-11    |
| IRF7     | 1.098569669  | 5.117893278 | 6.438178214  | 3.40E-10    |
| CYBB     | 1.099288127  | 4.448636829 | 4.699294737  | 3.57E-06    |
| TNFSF13B | 1.1044931    | 3.557799131 | 5.729195305  | 1.96E-08    |
| GZMB     | 1.107886017  | 3.900544075 | 3.993634757  | 7.72E-05    |
| CTLA4    | 1.109099123  | 1.954266179 | 5.919680232  | 6.84E-09    |
| OSM      | 1.113332142  | 1.862025289 | 5.016511138  | 7.86E-07    |
| NMB      | 1.114015131  | 3.764554936 | 6.251828663  | 1.02E-09    |
| IL24     | 1.115605189  | 2.093794336 | 4.762426435  | 2.66E-06    |
| LCP2     | 1.115938667  | 3.893428427 | 6.074165676  | 2.85E-09    |
| CST4     | 1.119604039  | 1.072673486 | 5.182123942  | 3.45E-07    |
| PSMD3    | 1.119858119  | 6.670788088 | 7.155843007  | 3.88E-12    |
| NR2C1    | 1.12501238   | 3.674038237 | 10.73069287  | 7.80E-24    |
| PSMD14   | 1.126665497  | 4.518408346 | 12.12893644  | 3.94E-29    |
| WNT5A    | 1.133099201  | 3.379308559 | 5.582502061  | 4.33E-08    |
| CMTM6    | 1.136177961  | 5.721569839 | 11.14370589  | 2.30E-25    |
| PSMD11   | 1.145635356  | 6.034842337 | 11.56911177  | 5.69E-27    |

|           |             |             |             |             |
|-----------|-------------|-------------|-------------|-------------|
| NRAS      | 1.146329043 | 5.109718608 | 9.392777144 | 4.17E-19    |
| IL23A     | 1.146808056 | 2.096506192 | 6.274195058 | 8.97E-10    |
| RBP4      | 1.146922257 | 3.392805958 | 2.846755687 | 0.00463931  |
| HDGF      | 1.15116845  | 8.290769467 | 9.724273059 | 3.04E-20    |
| CACYBP    | 1.152931457 | 5.662607604 | 10.2323122  | 4.96E-22    |
| TLR2      | 1.166392778 | 2.595914641 | 7.177354842 | 3.37E-12    |
| S100A10   | 1.167152018 | 9.567618942 | 5.984738225 | 4.74E-09    |
| STC2      | 1.172213359 | 1.955540803 | 6.736637873 | 5.52E-11    |
| IL2RA     | 1.17865725  | 2.275278173 | 6.327579395 | 6.55E-10    |
| F2RL1     | 1.182512046 | 5.378683397 | 4.826901941 | 1.96E-06    |
| PLSCR1    | 1.182666929 | 6.385605839 | 8.868357022 | 2.33E-17    |
| PDIA3     | 1.185356419 | 8.326016103 | 10.49439259 | 5.66E-23    |
| SAA1      | 1.186883284 | 4.36615114  | 2.496422252 | 0.012938191 |
| CXCR4     | 1.188869198 | 5.954287207 | 5.141895928 | 4.23E-07    |
| TAP2      | 1.19424062  | 3.947160844 | 7.958487721 | 1.73E-14    |
| PDGFB     | 1.198322221 | 3.868276565 | 7.798208084 | 5.28E-14    |
| ZC3HAV1L  | 1.200624217 | 3.382709436 | 7.501788776 | 3.96E-13    |
| ADAR      | 1.205522976 | 6.923634629 | 10.10437331 | 1.42E-21    |
| CTSB      | 1.221968808 | 9.041614609 | 7.789209766 | 5.61E-14    |
| BST2      | 1.225818713 | 7.444269196 | 4.971362079 | 9.80E-07    |
| PGF       | 1.239156825 | 2.716101305 | 8.230187518 | 2.53E-15    |
| JAG2      | 1.241710444 | 3.326060367 | 7.707937487 | 9.81E-14    |
| VEGFA     | 1.24410416  | 4.683477065 | 6.958031812 | 1.38E-11    |
| DLL4      | 1.250868981 | 3.450574602 | 8.538080227 | 2.72E-16    |
| PLXNA3    | 1.252104571 | 3.660077596 | 8.386935989 | 8.18E-16    |
| PLXND1    | 1.260782637 | 5.135883061 | 7.110053474 | 5.21E-12    |
| SLC11A1   | 1.261622855 | 2.14713687  | 7.343340497 | 1.14E-12    |
| IKBKE     | 1.268145162 | 3.881763926 | 8.919467759 | 1.58E-17    |
| LEFTY1    | 1.277612537 | 1.49330753  | 3.411058594 | 0.000711559 |
| CXCL13    | 1.278314277 | 4.377472426 | 3.299192579 | 0.001054597 |
| TNFSF15   | 1.284728819 | 2.714024774 | 7.367671823 | 9.68E-13    |
| CTSS      | 1.299765934 | 6.363734476 | 6.918740029 | 1.77E-11    |
| DMBT1     | 1.308773982 | 4.987554681 | 2.352511184 | 0.019120443 |
| CKLF      | 1.309119148 | 4.851661634 | 9.467933091 | 2.31E-19    |
| TNFSF11   | 1.31194163  | 1.551494464 | 8.300357216 | 1.53E-15    |
| TNFRSF25  | 1.315413086 | 2.855190587 | 7.284929237 | 1.67E-12    |
| TNFSF9    | 1.316543041 | 2.589210246 | 4.70704509  | 3.45E-06    |
| LCN2      | 1.318747314 | 9.728898369 | 2.67131782  | 0.007857222 |
| PRKCG     | 1.318856851 | 1.515805531 | 5.507174176 | 6.46E-08    |
| STC1      | 1.321391173 | 4.19074756  | 6.592085899 | 1.34E-10    |
| NFKBIE    | 1.34926515  | 4.199180085 | 9.61742782  | 7.12E-20    |
| IL2RG     | 1.349606444 | 6.379339776 | 5.043173581 | 6.90E-07    |
| CMTM8     | 1.354388067 | 4.792444965 | 9.238783652 | 1.38E-18    |
| ICAM1     | 1.377048003 | 5.324830561 | 6.470000831 | 2.81E-10    |
| LYZ       | 1.382217409 | 9.856051822 | 3.427500976 | 0.000670969 |
| UNC93B1   | 1.387037966 | 6.209974927 | 8.776571161 | 4.64E-17    |
| HSP90AB1  | 1.392299926 | 9.89123999  | 11.23137257 | 1.08E-25    |
| FCER1G    | 1.392352351 | 7.448246805 | 6.458327562 | 3.01E-10    |
| FABP6     | 1.396010824 | 2.245290362 | 5.018467865 | 7.79E-07    |
| TNFRSF10A | 1.406930087 | 3.828344649 | 9.717423257 | 3.21E-20    |
| TAP1      | 1.426444207 | 6.895918479 | 6.972161381 | 1.26E-11    |
| CARD11    | 1.441748156 | 3.376915459 | 5.408132865 | 1.09E-07    |
| IFITM1    | 1.449222964 | 7.953276893 | 5.96681088  | 5.25E-09    |

|           |             |             |             |             |
|-----------|-------------|-------------|-------------|-------------|
| DKK1      | 1.454605799 | 2.621650456 | 3.292069181 | 0.001080959 |
| CMTM7     | 1.466754732 | 4.680904877 | 8.37010173  | 9.24E-16    |
| SEMA4G    | 1.47230693  | 4.665729584 | 6.862234402 | 2.52E-11    |
| AMH       | 1.487734986 | 1.87337981  | 5.941276161 | 6.06E-09    |
| OSMR      | 1.490040965 | 4.788375612 | 7.251485879 | 2.08E-12    |
| HSP90AA1  | 1.500561116 | 9.252712271 | 12.57251921 | 7.11E-31    |
| NOX1      | 1.504998397 | 1.78202544  | 4.887972317 | 1.47E-06    |
| LYN       | 1.506611721 | 4.979317468 | 10.07327531 | 1.82E-21    |
| CDH1      | 1.5067699   | 7.132657965 | 5.720155471 | 2.06E-08    |
| PLXNA1    | 1.511132377 | 4.567150181 | 9.959007734 | 4.61E-21    |
| CCL3      | 1.513923342 | 2.383993753 | 6.982552312 | 1.18E-11    |
| CBLC      | 1.517866893 | 5.860464536 | 7.199047404 | 2.93E-12    |
| BMP8A     | 1.522113644 | 2.267672299 | 8.618194596 | 1.51E-16    |
| MICB      | 1.526731799 | 3.053444588 | 8.361340724 | 9.85E-16    |
| ISG15     | 1.549719025 | 7.008140357 | 6.546488099 | 1.77E-10    |
| BID       | 1.575749802 | 4.873911213 | 13.38361753 | 3.95E-34    |
| IL11      | 1.580605737 | 1.788794518 | 5.894563072 | 7.87E-09    |
| BMP1      | 1.592866018 | 4.498428231 | 11.2922248  | 6.37E-26    |
| CCL15     | 1.605418075 | 2.852764339 | 5.859592423 | 9.56E-09    |
| TFRC      | 1.606319629 | 6.200901029 | 8.057746066 | 8.63E-15    |
| VAV2      | 1.610984993 | 4.742572152 | 11.0460233  | 5.33E-25    |
| CXCL6     | 1.658417264 | 2.193241842 | 5.594841761 | 4.05E-08    |
| STAT1     | 1.687679006 | 7.12146997  | 9.314490928 | 7.67E-19    |
| APLN      | 1.721592306 | 2.30750757  | 7.593214439 | 2.14E-13    |
| PDGFRB    | 1.725331353 | 5.735592941 | 8.126935893 | 5.29E-15    |
| PLAUR     | 1.729771509 | 6.361942567 | 8.539063818 | 2.70E-16    |
| IL32      | 1.731357779 | 7.464222364 | 7.709396364 | 9.71E-14    |
| CXCL16    | 1.73328633  | 7.249714057 | 10.47720764 | 6.54E-23    |
| HNF4G     | 1.745613962 | 4.188483354 | 7.077312101 | 6.44E-12    |
| TNFRSF12A | 1.763406907 | 5.985473256 | 8.975559779 | 1.04E-17    |
| CCL18     | 1.776948909 | 4.542316984 | 4.859390249 | 1.68E-06    |
| AGT       | 1.784454591 | 4.665044932 | 5.654230963 | 2.94E-08    |
| TNFRSF10B | 1.789205492 | 5.047465601 | 12.39083764 | 3.71E-30    |
| TNFRSF11B | 1.8018337   | 2.617577283 | 6.317066719 | 6.97E-10    |
| LGR5      | 1.817130529 | 2.665659095 | 5.715468549 | 2.11E-08    |
| MDK       | 1.859154951 | 8.372193853 | 8.397598294 | 7.57E-16    |
| MSR1      | 1.88296774  | 3.571637598 | 8.376037443 | 8.86E-16    |
| F2R       | 1.92550785  | 5.228871154 | 10.66499104 | 1.36E-23    |
| IL17RB    | 2.060179672 | 3.878850035 | 10.67912184 | 1.20E-23    |
| CXCL5     | 2.066049121 | 4.531247343 | 3.857909198 | 0.000132838 |
| OLR1      | 2.071198371 | 2.561235226 | 9.151277461 | 2.71E-18    |
| MET       | 2.114805745 | 5.037652762 | 9.691465553 | 3.95E-20    |
| CXCL11    | 2.130843287 | 3.246887123 | 6.715791503 | 6.28E-11    |
| PLAU      | 2.149366078 | 5.359802835 | 9.930940207 | 5.79E-21    |
| LIF       | 2.1586203   | 3.475846399 | 10.44909456 | 8.26E-23    |
| BIRC5     | 2.175024354 | 4.455051719 | 11.28116896 | 7.01E-26    |
| CCL20     | 2.182972542 | 5.684414803 | 5.351518906 | 1.46E-07    |
| CXCL3     | 2.184308057 | 4.695682483 | 6.999581603 | 1.06E-11    |
| MMP9      | 2.255760636 | 4.578903589 | 7.800458592 | 5.20E-14    |
| HNF4A     | 2.286521939 | 5.180970266 | 8.761884499 | 5.18E-17    |
| FCGR3A    | 2.423048321 | 4.763223312 | 9.127127524 | 3.26E-18    |
| CXCL10    | 2.43635787  | 4.880420348 | 7.158121395 | 3.82E-12    |
| ESM1      | 2.460924084 | 2.542553543 | 11.8041859  | 7.15E-28    |

|       |             |             |             |          |
|-------|-------------|-------------|-------------|----------|
| MMP12 | 2.5619214   | 4.540566879 | 6.489977928 | 2.49E-10 |
| FGFR4 | 2.588013934 | 5.166765408 | 9.844508283 | 1.16E-20 |
| CXCL9 | 2.746989452 | 5.014336439 | 7.595007932 | 2.11E-13 |
| CLDN4 | 2.788485184 | 7.215418855 | 10.2803719  | 3.34E-22 |
| INHBA | 3.023284501 | 3.898639917 | 12.56619487 | 7.53E-31 |
| CXCL1 | 3.16376669  | 5.979897119 | 9.084146046 | 4.53E-18 |
| GDF15 | 3.340085013 | 6.431235537 | 12.30810696 | 7.85E-30 |
| SPP1  | 3.413890902 | 6.105015229 | 8.812399689 | 3.55E-17 |

| adj.P.Val   | B            |
|-------------|--------------|
| 5.09E-12    | 18.62216115  |
| 8.07E-08    | 8.524264645  |
| 2.52E-11    | 16.92310389  |
| 1.17E-09    | 12.89739302  |
| 6.08E-09    | 11.18657827  |
| 6.00E-07    | 6.428241973  |
| 0.008913757 | -3.331222848 |
| 3.98E-11    | 16.42353639  |
| 1.85E-06    | 5.290534026  |
| 0.000245057 | 0.267731359  |
| 7.89E-18    | 32.69659246  |
| 1.05E-10    | 15.41493787  |
| 3.19E-06    | 4.720131986  |
| 2.12E-08    | 9.932755974  |
| 1.37E-20    | 39.60316852  |
| 6.03E-09    | 11.19882071  |
| 3.54E-08    | 9.391620732  |
| 1.80E-11    | 17.28311654  |
| 0.00017603  | 0.607181009  |
| 3.18E-12    | 19.10014213  |
| 0.000510861 | -0.490339539 |
| 0.004620431 | -2.69084409  |
| 8.12E-07    | 6.12073677   |
| 4.85E-05    | 1.926774326  |
| 0.000229014 | 0.33358295   |
| 5.65E-06    | 4.118944701  |
| 1.25E-15    | 27.33666339  |
| 7.12E-08    | 8.66891098   |
| 9.24E-10    | 13.14197714  |
| 0.000840296 | -0.985560994 |
| 6.93E-08    | 8.703264866  |
| 9.33E-05    | 1.257447662  |
| 0.000256303 | 0.219240578  |
| 7.78E-18    | 32.7309757   |
| 4.89E-15    | 25.89272487  |
| 4.89E-09    | 11.41831055  |
| 0.000417838 | -0.276510562 |
| 5.78E-08    | 8.89543248   |
| 2.31E-10    | 14.57129984  |
| 1.34E-05    | 3.227431513  |
| 2.73E-07    | 7.252380429  |
| 2.24E-12    | 19.47664946  |
| 1.96E-06    | 5.227354036  |
| 1.85E-05    | 2.885474627  |
| 4.72E-06    | 4.314524135  |
| 0.000256303 | 0.220831341  |
| 5.14E-05    | 1.867804222  |
| 0.025083376 | -4.314352632 |
| 1.41E-10    | 15.08771098  |

|             |              |
|-------------|--------------|
| 1.45E-21    | 42.14332935  |
| 4.66E-09    | 11.4690399   |
| 5.18E-06    | 4.205583598  |
| 6.61E-05    | 1.616009766  |
| 1.46E-08    | 10.31113323  |
| 2.47E-13    | 21.77888269  |
| 1.41E-05    | 3.168011167  |
| 4.79E-07    | 6.669598338  |
| 0.000255514 | 0.226306711  |
| 1.37E-20    | 39.68529643  |
| 3.89E-11    | 16.45246581  |
| 6.06E-14    | 23.25925547  |
| 5.09E-06    | 4.233182388  |
| 5.24E-07    | 6.576786047  |
| 5.25E-07    | 6.571628658  |
| 5.52E-07    | 6.516967414  |
| 8.65E-19    | 35.02985215  |
| 0.00059642  | -0.650526891 |
| 3.50E-05    | 2.25460792   |
| 1.25E-15    | 27.32890141  |
| 2.07E-13    | 21.97363154  |
| 6.89E-06    | 3.909896139  |
| 5.68E-10    | 13.6499712   |
| 9.24E-10    | 13.13845662  |
| 4.79E-19    | 35.71421231  |
| 1.77E-23    | 46.8252014   |
| 1.80E-10    | 14.8322401   |
| 3.61E-15    | 26.21855889  |
| 2.02E-18    | 34.12437466  |
| 9.11E-17    | 30.11913426  |
| 1.58E-05    | 3.048533228  |
| 6.56E-08    | 8.760166412  |
| 1.07E-05    | 3.45410724   |
| 1.17E-05    | 3.370578784  |
| 4.53E-14    | 23.57717706  |
| 2.28E-19    | 36.52861953  |
| 1.24E-10    | 15.22485021  |
| 1.74E-09    | 12.47860442  |
| 1.00E-05    | 3.523543815  |
| 7.98E-08    | 8.538627443  |
| 0.000176505 | 0.602485081  |
| 3.02E-08    | 9.559433815  |
| 2.49E-06    | 4.975412057  |
| 4.92E-09    | 11.40614308  |
| 7.62E-06    | 3.805749306  |
| 1.34E-08    | 10.40791048  |
| 1.15E-06    | 5.766680763  |
| 2.70E-11    | 16.84395396  |
| 5.21E-22    | 43.33530647  |
| 6.58E-27    | 55.38033386  |
| 1.67E-07    | 7.771876868  |
| 1.77E-23    | 46.81328519  |
| 7.12E-25    | 50.46782081  |

|             |              |
|-------------|--------------|
| 8.52E-18    | 32.60065437  |
| 4.38E-09    | 11.53349779  |
| 0.00778658  | -3.195716235 |
| 7.82E-19    | 35.1791537   |
| 1.91E-20    | 39.23719934  |
| 2.40E-11    | 16.98039595  |
| 2.15E-08    | 9.914518724  |
| 3.18E-10    | 14.24940826  |
| 3.25E-09    | 11.83898077  |
| 5.75E-06    | 4.097435204  |
| 3.70E-16    | 28.64066368  |
| 2.99E-21    | 41.37832469  |
| 0.020099329 | -4.112613772 |
| 1.40E-06    | 5.572401917  |
| 1.75E-13    | 22.14407315  |
| 4.85E-13    | 21.05209944  |
| 3.23E-12    | 19.07623039  |
| 5.07E-20    | 38.20354968  |
| 5.11E-13    | 20.99128004  |
| 3.06E-06    | 4.763631721  |
| 2.92E-14    | 24.03193213  |
| 8.62E-13    | 20.44432325  |
| 8.74E-11    | 15.6042998   |
| 3.61E-15    | 26.22561662  |
| 1.01E-14    | 25.1416462   |
| 3.53E-11    | 16.55458654  |
| 8.77E-12    | 18.04379767  |
| 2.65E-16    | 29.01995641  |
| 0.001360653 | -1.477219038 |
| 0.001982563 | -1.84130191  |
| 7.52E-12    | 18.201246    |
| 1.09E-10    | 15.3613116   |
| 0.028984393 | -4.455484606 |
| 5.04E-18    | 33.18026908  |
| 1.80E-14    | 24.52686827  |
| 1.26E-11    | 17.66744754  |
| 9.70E-06    | 3.558007019  |
| 0.012698285 | -3.669385943 |
| 2.43E-07    | 7.384772047  |
| 7.34E-10    | 13.38367743  |
| 1.66E-18    | 34.34191387  |
| 2.20E-06    | 5.101271601  |
| 2.71E-17    | 31.42235028  |
| 1.46E-09    | 12.66431775  |
| 0.001287952 | -1.422738164 |
| 6.83E-16    | 27.96322521  |
| 9.83E-24    | 47.56057429  |
| 1.55E-09    | 12.59610728  |
| 2.48E-06    | 4.984628717  |
| 8.05E-19    | 35.12530554  |
| 8.04E-11    | 15.69194462  |
| 3.90E-07    | 6.882707153  |
| 2.36E-08    | 9.816346635  |



|             |             |
|-------------|-------------|
| 0.002020749 | -1.86409661 |
| 1.12E-14    | 25.02175673 |
| 1.51E-10    | 15.01377528 |
| 2.69E-08    | 9.676942474 |
| 1.54E-11    | 17.45300855 |
| 2.52E-28    | 59.34937042 |
| 4.44E-06    | 4.376939047 |
| 5.90E-20    | 37.95347275 |
| 8.32E-08    | 8.490886981 |
| 1.44E-19    | 37.03856897 |
| 7.58E-11    | 15.7564881  |
| 2.10E-11    | 17.11830542 |
| 2.07E-15    | 26.80563787 |
| 1.17E-14    | 24.95943023 |
| 9.43E-10    | 13.11372878 |
| 3.95E-31    | 66.76304228 |
| 3.46E-08    | 9.423218222 |
| 7.03E-24    | 48.08109823 |
| 4.15E-08    | 9.234378146 |
| 9.20E-14    | 22.8284411  |
| 3.81E-23    | 45.9842873  |
| 1.58E-07    | 7.835719911 |
| 1.54E-17    | 32.00005983 |
| 1.83E-12    | 19.67953463 |
| 5.82E-14    | 23.30912336 |
| 3.61E-15    | 26.23271494 |
| 8.61E-13    | 20.4541038  |
| 3.27E-21    | 41.23697009 |
| 4.27E-11    | 16.34856407 |
| 1.79E-16    | 29.43789917 |
| 5.06E-06    | 4.245736648 |
| 1.16E-07    | 8.144674542 |
| 9.30E-28    | 57.71596349 |
| 3.44E-09    | 11.77865561 |
| 8.50E-08    | 8.466160024 |
| 9.49E-15    | 25.2176683  |
| 1.08E-14    | 25.06401004 |
| 7.99E-22    | 42.78871562 |
| 7.54E-22    | 42.90611477 |
| 0.000291894 | 0.090709681 |
| 5.12E-17    | 30.7584439  |
| 9.43E-19    | 34.92145938 |
| 3.60E-10    | 14.12362933 |
| 1.76E-19    | 36.81480838 |
| 3.76E-21    | 41.00601304 |
| 7.03E-24    | 47.98641845 |
| 5.14E-07    | 6.599260218 |
| 6.89E-11    | 15.86242909 |
| 4.85E-13    | 21.06731868 |
| 7.52E-16    | 27.85527284 |
| 6.05E-17    | 30.57594998 |
| 2.68E-11    | 16.85838994 |
| 1.02E-25    | 52.5168721  |

|          |             |
|----------|-------------|
| 1.31E-09 | 12.78128227 |
| 3.23E-19 | 36.12817598 |
| 1.83E-12 | 19.69142462 |
| 1.37E-20 | 39.62746869 |
| 2.52E-28 | 59.29233515 |
| 8.10E-17 | 30.25193898 |
| 1.57E-27 | 56.97570967 |
| 5.38E-16 | 28.2270939  |
