# Supplementary material for: Development and Verification of an Immune-Based Gene Signature for Risk Stratification and Immunotherapeutic Efficacy Assessment in Gastric Cancer
Source: PubMed Central journal article supplement (PMC8602949; doi:10.1155/2021/4251763), 2021-11-11
Supplement: 4251763.f3.pdf [file 4251763.f3.pdf]

Supplementary table 3. Differentially expressed genes between high- and low-risk gastric cancer samples.

| ID         | logFC        | AveExpr     | t            | P.Value     |
|------------|--------------|-------------|--------------|-------------|
| VSNL1      | -1.047435606 | 2.74088034  | -5.737598266 | 2.08E-08    |
| ASCL2      | -0.953204521 | 4.169773665 | -4.340749116 | 1.86E-05    |
| IDO1       | -0.947197057 | 3.875146241 | -4.216216355 | 3.17E-05    |
| AC007991.2 | -0.916887821 | 1.585223674 | -5.356520093 | 1.54E-07    |
| MYB        | -0.907002167 | 3.690579861 | -6.71733352  | 7.53E-11    |
| SNORC      | -0.775795685 | 2.433066252 | -6.295815667 | 9.18E-10    |
| CXCL11     | -0.756511214 | 3.404938357 | -4.057263345 | 6.13E-05    |
| PSAT1      | -0.751565593 | 4.972038827 | -5.383122466 | 1.35E-07    |
| MMP12      | -0.747358796 | 4.698922073 | -3.250163749 | 0.001265533 |
| RPL10P6    | -0.708773734 | 4.910755805 | -4.575455195 | 6.61E-06    |
| PBK        | -0.702872007 | 4.310192027 | -6.154121286 | 2.07E-09    |
| SNHG25     | -0.698528514 | 4.814090651 | -4.582270887 | 6.41E-06    |
| CPNE7      | -0.696328414 | 2.409538795 | -5.154352405 | 4.27E-07    |
| GPA33      | -0.694450204 | 3.503869769 | -2.94901627  | 0.003402607 |
| CXCL9      | -0.661160824 | 5.209278196 | -3.087747713 | 0.002178197 |
| KCNQ1      | -0.653375352 | 5.115470652 | -4.340218194 | 1.87E-05    |
| CXCL10     | -0.652198042 | 5.058291333 | -3.257206779 | 0.001235456 |
| CKS2       | -0.652098596 | 7.20773849  | -6.951678412 | 1.78E-11    |
| ATP10B     | -0.643638803 | 3.86224413  | -3.283680632 | 0.00112823  |
| PLEKHS1    | -0.627726193 | 4.205587715 | -3.516406678 | 0.000495119 |
| ADGRG7     | -0.626412237 | 2.341067738 | -3.387318765 | 0.000786255 |
| SNORD104   | -0.625527572 | 5.014326146 | -5.324983994 | 1.81E-07    |
| CDCA7      | -0.624847291 | 5.209722962 | -5.136948975 | 4.65E-07    |
| NOS2       | -0.62455855  | 2.416269237 | -2.984209356 | 0.003043303 |
| PTMAP4     | -0.61328363  | 4.921727581 | -5.861391488 | 1.06E-08    |
| CASP1      | -0.612120526 | 4.782910685 | -4.817599408 | 2.17E-06    |
| BATF2      | -0.611445562 | 3.912265104 | -4.566617867 | 6.88E-06    |
| LRRC26     | -0.610843304 | 3.020156554 | -3.681967283 | 0.000268045 |
| SAPCD2     | -0.606896002 | 4.657015133 | -5.186173009 | 3.64E-07    |
| LINC01871  | -0.605355146 | 3.129680587 | -4.608337732 | 5.70E-06    |
| AMH        | -0.594869973 | 1.999494414 | -4.021990741 | 7.08E-05    |
| KRT8P36    | -0.591698124 | 2.441720193 | -3.737668782 | 0.000216923 |
| GAD1       | -0.589977514 | 1.412158962 | -4.769503079 | 2.72E-06    |
| PPIC       | 0.580197827  | 5.64655415  | 6.58907792   | 1.63E-10    |
| COX4I2     | 0.580277481  | 2.370714828 | 8.106750745  | 8.87E-15    |
| ABCA1      | 0.580944151  | 3.352282368 | 6.367642003  | 6.05E-10    |
| KLF2       | 0.581009478  | 6.194896875 | 4.778309834  | 2.61E-06    |
| STUM       | 0.581066171  | 0.814658642 | 6.015744175  | 4.52E-09    |
| SALL4      | 0.581211116  | 1.778158752 | 3.889166791  | 0.000120415 |
| ZFP36      | 0.581278487  | 8.364447947 | 5.679239196  | 2.85E-08    |
| NOTCH2     | 0.581357752  | 4.66050098  | 6.605981162  | 1.47E-10    |
| CYP2B6     | 0.581362748  | 2.455814438 | 2.752931535  | 0.006215007 |
| ADAMTS7    | 0.582081194  | 2.662282388 | 6.588573344  | 1.64E-10    |
| RPL39L     | 0.582149808  | 3.963767124 | 4.049465369  | 6.33E-05    |
| AC005165.1 | 0.582259538  | 0.719817317 | 6.500944744  | 2.76E-10    |
| NPR2       | 0.582786923  | 2.492176276 | 8.35909681   | 1.52E-15    |
| TAC1       | 0.582798451  | 0.707104495 | 4.862052533  | 1.76E-06    |
| PLA1A      | 0.583077004  | 2.953546217 | 4.40410138   | 1.41E-05    |
| SMYD1      | 0.583661591  | 0.806011185 | 3.713055081  | 0.000238262 |

|            |             |             |             |             |
|------------|-------------|-------------|-------------|-------------|
| MX2        | 0.583700283 | 4.447701844 | 5.247425525 | 2.68E-07    |
| ITIH3      | 0.585228373 | 0.814242032 | 8.82235579  | 5.44E-17    |
| C2CD4B     | 0.585321797 | 3.727559495 | 3.586554498 | 0.000382834 |
| MSC-AS1    | 0.585424015 | 1.510514427 | 8.805744711 | 6.15E-17    |
| AL136084.3 | 0.585519515 | 2.333227674 | 4.701699091 | 3.72E-06    |
| LAMB1      | 0.58552702  | 5.904145874 | 6.488576318 | 2.97E-10    |
| GAP43      | 0.585719326 | 0.904709916 | 6.627032761 | 1.30E-10    |
| ITM2C      | 0.585948691 | 6.639430419 | 5.284868714 | 2.22E-07    |
| GRID1      | 0.586046025 | 0.929506082 | 7.923113894 | 3.13E-14    |
| AC037198.1 | 0.58617932  | 1.116069193 | 7.427445633 | 8.56E-13    |
| LINC01082  | 0.586830353 | 1.568220176 | 5.360663456 | 1.51E-07    |
| SOX17      | 0.586871526 | 2.080637089 | 7.211801477 | 3.45E-12    |
| NTRK2      | 0.587158063 | 1.433631936 | 4.559851541 | 7.09E-06    |
| FAM124B    | 0.587307592 | 1.209152882 | 8.62274224  | 2.32E-16    |
| SNORD114-3 | 0.587449903 | 0.796297599 | 6.660363351 | 1.06E-10    |
| PLAU       | 0.588206513 | 5.53177901  | 4.676540981 | 4.18E-06    |
| CORIN      | 0.588607925 | 1.115227146 | 7.487356494 | 5.79E-13    |
| SNTA1      | 0.588961833 | 3.620993942 | 5.517066764 | 6.72E-08    |
| FGL2       | 0.589283821 | 4.221426643 | 3.767694018 | 0.000193331 |
| TSHZ2      | 0.589387246 | 2.233485386 | 5.687948624 | 2.72E-08    |
| GNAZ       | 0.589429549 | 2.382332699 | 4.79707339  | 2.39E-06    |
| MXRA5      | 0.589471577 | 5.536204291 | 4.203058588 | 3.35E-05    |
| LRCH2      | 0.589663655 | 1.141358522 | 8.730162707 | 1.07E-16    |
| TBKBP1     | 0.589733982 | 2.671437394 | 6.762410147 | 5.72E-11    |
| ENPP2      | 0.589839592 | 3.961765373 | 4.789272653 | 2.48E-06    |
| NPY        | 0.589850291 | 0.866705578 | 4.802377882 | 2.33E-06    |
| NLGN4X     | 0.590066177 | 1.048251257 | 5.943218347 | 6.77E-09    |
| TGFBR3     | 0.5900708   | 3.365676166 | 4.692813844 | 3.87E-06    |
| PCDH17     | 0.590452766 | 2.635382987 | 7.149141191 | 5.14E-12    |
| ECHDC3     | 0.591139072 | 2.605606893 | 3.559222937 | 0.000423395 |
| EFNB3      | 0.591145755 | 0.991018408 | 7.501035318 | 5.29E-13    |
| PLXNB3     | 0.592039253 | 1.700683121 | 4.5971439   | 5.99E-06    |
| ATF3       | 0.592115866 | 5.12887338  | 4.751689241 | 2.95E-06    |
| SH3BGRL    | 0.592316081 | 6.864955315 | 6.059046042 | 3.55E-09    |
| TXNIP      | 0.59236743  | 8.103377234 | 4.854782955 | 1.82E-06    |
| ADGRF5     | 0.592399764 | 3.676603674 | 6.872146864 | 2.92E-11    |
| ABHD8      | 0.59302294  | 3.429915319 | 6.828896991 | 3.81E-11    |
| CLDN23     | 0.593136155 | 4.419320658 | 4.09356187  | 5.28E-05    |
| RN7SL8P    | 0.593287986 | 1.402083312 | 5.398680752 | 1.24E-07    |
| GIHCG      | 0.593626328 | 2.062309661 | 7.343102699 | 1.48E-12    |
| FSCN1      | 0.593933488 | 5.90101018  | 4.552166254 | 7.34E-06    |
| P3H1       | 0.59408464  | 4.67147001  | 8.914143219 | 2.78E-17    |
| MAF        | 0.594511677 | 3.855307397 | 6.167013143 | 1.92E-09    |
| ABCA6      | 0.595006377 | 1.04631281  | 8.153735592 | 6.40E-15    |
| SYPL2      | 0.595200001 | 0.947266174 | 7.609750741 | 2.58E-13    |
| KCND1      | 0.595203513 | 1.551785142 | 8.769827465 | 7.99E-17    |
| MBNL1-AS1  | 0.595219672 | 1.350765934 | 5.31688708  | 1.89E-07    |
| RRAS       | 0.595590573 | 6.985236244 | 6.878849773 | 2.80E-11    |
| NUMBL      | 0.59564698  | 3.965133548 | 7.543522659 | 4.00E-13    |
| SLC1A7     | 0.596216204 | 1.177427433 | 6.416078773 | 4.55E-10    |
| RNASE1     | 0.596220684 | 7.683325209 | 4.471103294 | 1.05E-05    |
| PODNL1     | 0.596530545 | 2.507782322 | 5.558832158 | 5.40E-08    |
| RNA5SP283  | 0.596578796 | 2.622938739 | 4.400960002 | 1.43E-05    |

|             |             |             |             |             |
|-------------|-------------|-------------|-------------|-------------|
| AMPH        | 0.596723202 | 1.241875924 | 8.240625412 | 3.49E-15    |
| ARMC9       | 0.59704924  | 2.715738878 | 8.461207682 | 7.36E-16    |
| ABCA9       | 0.597213033 | 0.956674633 | 7.276057961 | 2.28E-12    |
| AHNAK       | 0.59742701  | 6.248960396 | 5.565730782 | 5.21E-08    |
| ITGB5       | 0.597687891 | 5.799622567 | 7.898186611 | 3.71E-14    |
| CIDEC       | 0.59783865  | 2.060169498 | 3.690067598 | 0.000259963 |
| LINC01116   | 0.598078719 | 1.389386201 | 6.932313115 | 2.01E-11    |
| PDZD2       | 0.598393698 | 1.691870459 | 7.505245744 | 5.14E-13    |
| LMCD1       | 0.59844878  | 2.748414503 | 8.069671688 | 1.15E-14    |
| HTR2B       | 0.598503492 | 1.183834441 | 6.491350299 | 2.92E-10    |
| SNCA        | 0.598620475 | 1.172509042 | 7.710495334 | 1.32E-13    |
| DZIP1L      | 0.598735571 | 2.098866624 | 5.247563499 | 2.68E-07    |
| CHN1        | 0.598864644 | 3.418341683 | 6.316288183 | 8.15E-10    |
| CACNB2      | 0.599384612 | 1.52934299  | 6.215617548 | 1.46E-09    |
| RNF212      | 0.599588915 | 1.166920185 | 5.497467172 | 7.45E-08    |
| PLAAT5      | 0.599637775 | 1.276565068 | 4.72744553  | 3.30E-06    |
| GALNT14     | 0.599888393 | 1.495252617 | 4.428555404 | 1.27E-05    |
| DACT2       | 0.600595413 | 1.259020144 | 3.689744746 | 0.000260281 |
| MMP23B      | 0.600668456 | 1.160161071 | 8.024597275 | 1.56E-14    |
| PLPPR2      | 0.600830661 | 4.571805108 | 6.963790773 | 1.65E-11    |
| AR          | 0.601521014 | 0.777963467 | 8.91347937  | 2.79E-17    |
| SERPINF2    | 0.601776307 | 1.784796496 | 4.733732841 | 3.21E-06    |
| SUSD5       | 0.601893515 | 0.769815249 | 9.145364749 | 5.01E-18    |
| CDH2        | 0.602116818 | 1.330479975 | 5.657996318 | 3.19E-08    |
| IFIT1       | 0.602347962 | 3.16161352  | 4.418848592 | 1.33E-05    |
| BTBD19      | 0.602538571 | 2.374268147 | 7.947291802 | 2.66E-14    |
| WTIP        | 0.602553383 | 1.282314614 | 9.770458593 | 4.30E-20    |
| LDLRAD4     | 0.602672222 | 2.665557608 | 6.031340763 | 4.14E-09    |
| PLA2G5      | 0.602827    | 1.10522702  | 6.843964217 | 3.47E-11    |
| ANOS1       | 0.603000515 | 2.083422343 | 5.759155511 | 1.85E-08    |
| NPNT        | 0.603016051 | 4.08053054  | 3.869685395 | 0.000130021 |
| HSD11B1     | 0.603269831 | 2.287028258 | 5.204144035 | 3.33E-07    |
| ERICH5      | 0.603486102 | 1.890225272 | 4.640807259 | 4.92E-06    |
| MT1M        | 0.603534102 | 2.304181835 | 3.840804626 | 0.000145607 |
| NAP1L5      | 0.604180787 | 1.990819981 | 8.181089517 | 5.29E-15    |
| FARP1       | 0.604209762 | 3.950040983 | 6.66505042  | 1.03E-10    |
| PHYHIP      | 0.604219037 | 1.143022085 | 8.391831512 | 1.20E-15    |
| DIRAS3      | 0.604246078 | 1.35470924  | 6.287780987 | 9.62E-10    |
| CCDC144NL-A | 0.604325958 | 1.206809207 | 5.299066458 | 2.07E-07    |
| MEIS3P2     | 0.604545757 | 1.022971804 | 8.585661666 | 3.02E-16    |
| CLSTN3      | 0.604705859 | 4.5509423   | 6.564474097 | 1.89E-10    |
| HAVCR1      | 0.604738081 | 1.085684609 | 4.234723945 | 2.93E-05    |
| FGF14-AS2   | 0.60490786  | 0.914259083 | 7.639210341 | 2.12E-13    |
| LIMCH1      | 0.604991771 | 2.634619025 | 6.297731847 | 9.08E-10    |
| RTL8A       | 0.605556433 | 6.116733128 | 5.555701673 | 5.49E-08    |
| MAGI2       | 0.605607684 | 1.172772104 | 9.185817053 | 3.70E-18    |
| SLC29A4     | 0.606156803 | 1.898228595 | 4.109617434 | 4.94E-05    |
| BCL6        | 0.606357827 | 4.499708691 | 7.21410756  | 3.40E-12    |
| CCN5        | 0.606484759 | 0.919807585 | 6.593458635 | 1.59E-10    |
| MAMLD1      | 0.606536196 | 1.875939851 | 7.103366483 | 6.87E-12    |
| ZNF677      | 0.607500592 | 1.526749571 | 7.16143108  | 4.75E-12    |
| FOS         | 0.607613759 | 7.685536321 | 4.175653961 | 3.76E-05    |
| ST6GALNAC6  | 0.607701506 | 4.325574998 | 7.237876258 | 2.92E-12    |

|            |             |             |             |             |
|------------|-------------|-------------|-------------|-------------|
| ADAMTS4    | 0.607878196 | 2.981191999 | 6.055342823 | 3.62E-09    |
| SNAI1      | 0.608766713 | 3.341528403 | 6.695295382 | 8.60E-11    |
| PDE1B      | 0.608767743 | 1.409006859 | 7.3511478   | 1.41E-12    |
| AC090877.2 | 0.608918225 | 0.876316307 | 8.697090487 | 1.35E-16    |
| SELE       | 0.609108103 | 2.008344857 | 4.708629856 | 3.60E-06    |
| NCKAP5L    | 0.609327959 | 3.570732251 | 8.049368065 | 1.32E-14    |
| AP003071.3 | 0.609512532 | 0.921749588 | 6.576219207 | 1.76E-10    |
| AVPR1A     | 0.609798566 | 1.377290958 | 7.719584159 | 1.24E-13    |
| APOC3      | 0.610044975 | 1.223112124 | 3.187083877 | 0.001566821 |
| TDRP       | 0.610336177 | 1.342050119 | 7.495069508 | 5.50E-13    |
| CCDC136    | 0.610580182 | 1.515384786 | 5.007362065 | 8.77E-07    |
| TBC1D9     | 0.610845025 | 3.538529224 | 7.052476525 | 9.47E-12    |
| CPZ        | 0.610890819 | 0.861526737 | 9.481822383 | 3.96E-19    |
| DKK2       | 0.610935395 | 1.408973509 | 6.100697341 | 2.80E-09    |
| AC016747.1 | 0.610936781 | 1.983640144 | 6.917008609 | 2.21E-11    |
| TEAD1      | 0.610993529 | 4.134883159 | 6.312481959 | 8.33E-10    |
| DTX1       | 0.611555963 | 2.535256268 | 5.247547132 | 2.68E-07    |
| NOTCH4     | 0.611977336 | 3.101808303 | 7.846031961 | 5.29E-14    |
| WIPF3      | 0.612042264 | 2.289209642 | 4.756459989 | 2.89E-06    |
| SMIM3      | 0.612419113 | 4.055670119 | 6.54138994  | 2.17E-10    |
| ZDHHC2     | 0.612473572 | 3.192562734 | 5.131155056 | 4.79E-07    |
| NR2F2-AS1  | 0.612714689 | 1.198954273 | 7.958924678 | 2.45E-14    |
| RAB23      | 0.612849349 | 2.79553311  | 5.315711592 | 1.90E-07    |
| UST        | 0.613260665 | 2.264667311 | 4.981228293 | 9.95E-07    |
| PTPRU      | 0.613313166 | 3.900311778 | 4.046505996 | 6.40E-05    |
| COL9A1     | 0.613390913 | 1.431841523 | 5.305959364 | 2.00E-07    |
| RSPO2      | 0.61345299  | 0.827192349 | 6.824212713 | 3.92E-11    |
| LPL        | 0.613936013 | 2.195852289 | 5.380819032 | 1.36E-07    |
| SHE        | 0.614001614 | 1.680016919 | 8.230327807 | 3.75E-15    |
| PON3       | 0.614172543 | 1.666721598 | 3.91578632  | 0.00010837  |
| ORM1       | 0.614402936 | 1.628689925 | 2.661444226 | 0.008140008 |
| FNBP1      | 0.614439902 | 4.346485979 | 4.748801193 | 2.99E-06    |
| CYTL1      | 0.614490301 | 1.506558659 | 6.888879163 | 2.63E-11    |
| ANGPT1     | 0.61455918  | 1.684460962 | 7.496762885 | 5.44E-13    |
| PLA2G4C    | 0.614667552 | 2.661989917 | 5.767691015 | 1.77E-08    |
| FHL3       | 0.61471135  | 5.05460309  | 7.264979129 | 2.45E-12    |
| TCEAL8     | 0.614736127 | 5.433012044 | 7.28929544  | 2.10E-12    |
| TMEM37     | 0.614920617 | 4.373942982 | 4.847638733 | 1.88E-06    |
| CSGALNACT1 | 0.615244144 | 3.248426854 | 6.790161944 | 4.83E-11    |
| GNE        | 0.61528024  | 3.920393562 | 4.819565095 | 2.15E-06    |
| MYCT1      | 0.615602451 | 2.458015404 | 8.19714839  | 4.73E-15    |
| PIFO       | 0.61568184  | 1.175084568 | 6.307556767 | 8.58E-10    |
| BMP6       | 0.615769158 | 1.601276144 | 7.122643003 | 6.08E-12    |
| TTYH2      | 0.615929508 | 2.34431397  | 5.977227335 | 5.60E-09    |
| THBS3      | 0.616099518 | 3.728176473 | 8.160735504 | 6.10E-15    |
| EPAS1      | 0.616238627 | 6.493598619 | 8.032386294 | 1.48E-14    |
| AC053503.3 | 0.616487743 | 0.96053242  | 4.456726767 | 1.12E-05    |
| ECEL1      | 0.616555062 | 1.267901791 | 5.193290824 | 3.52E-07    |
| RNF217     | 0.616567789 | 1.510488857 | 8.262716566 | 2.99E-15    |
| SLC19A3    | 0.616578669 | 2.384963589 | 3.318677426 | 0.00099972  |
| HACD4      | 0.61682332  | 1.96903561  | 7.650794799 | 1.96E-13    |
| BARX1-DT   | 0.616973479 | 0.715067328 | 7.259759208 | 2.54E-12    |
| CSF1R      | 0.617491015 | 4.480028009 | 4.641052114 | 4.91E-06    |

|            |             |             |             |             |
|------------|-------------|-------------|-------------|-------------|
| BACE1      | 0.617503691 | 3.515984161 | 7.790170307 | 7.72E-14    |
| TNFRSF11B  | 0.617759401 | 2.767758047 | 3.615021394 | 0.000344485 |
| SLC34A2    | 0.617822008 | 2.030901026 | 3.075271439 | 0.00226887  |
| RAMP3      | 0.617969595 | 4.038783113 | 6.477204547 | 3.18E-10    |
| PROCR      | 0.61848994  | 5.220555244 | 5.377909358 | 1.38E-07    |
| BMPRI1B    | 0.618689452 | 1.044314495 | 6.544660433 | 2.13E-10    |
| PAPSS2     | 0.618821962 | 4.182433788 | 5.892627737 | 8.95E-09    |
| FES        | 0.618832477 | 3.248007859 | 7.150733512 | 5.09E-12    |
| CHST13     | 0.619661565 | 1.895755373 | 3.913818066 | 0.00010922  |
| PBX3       | 0.619765929 | 4.152777206 | 6.26912736  | 1.07E-09    |
| KLHL29     | 0.619923244 | 2.142508766 | 7.050097426 | 9.62E-12    |
| JAZF1      | 0.620103677 | 3.348220096 | 7.980675813 | 2.11E-14    |
| PTGIR      | 0.620362755 | 2.306487797 | 7.970213963 | 2.27E-14    |
| SCN7A      | 0.620392248 | 0.770908619 | 6.256526794 | 1.15E-09    |
| TRO        | 0.620527484 | 1.276469939 | 9.041656492 | 1.08E-17    |
| RGS7BP     | 0.620824508 | 1.026133144 | 8.553996305 | 3.80E-16    |
| SBSPON     | 0.620935243 | 2.010298072 | 4.530089736 | 8.10E-06    |
| ZNF528-AS1 | 0.62104259  | 1.566443386 | 6.639787697 | 1.20E-10    |
| CHST7      | 0.621302116 | 2.228171515 | 8.680371179 | 1.53E-16    |
| ZNF512B    | 0.621605127 | 2.867644904 | 5.682648387 | 2.80E-08    |
| PGF        | 0.621743376 | 2.831265104 | 7.509835522 | 4.99E-13    |
| PRAME      | 0.622191474 | 1.88968741  | 2.942764985 | 0.003470346 |
| SESN3      | 0.622383206 | 2.962137169 | 5.089406526 | 5.88E-07    |
| ARHGAP6    | 0.622715584 | 1.987711605 | 6.122943737 | 2.47E-09    |
| HORMAD1    | 0.62289023  | 1.041908408 | 4.524458291 | 8.31E-06    |
| EMP3       | 0.622977452 | 5.95897738  | 6.29120539  | 9.43E-10    |
| PLXND1     | 0.623066918 | 5.249196251 | 6.32762049  | 7.63E-10    |
| FRAS1      | 0.6232493   | 1.96813136  | 4.772704349 | 2.68E-06    |
| METTL7A    | 0.623718909 | 4.745164878 | 5.408167614 | 1.18E-07    |
| CHL1       | 0.62388803  | 1.28703583  | 6.675099051 | 9.72E-11    |
| STAB1      | 0.624340424 | 3.938045173 | 5.974438269 | 5.69E-09    |
| VPS35L     | 0.624560365 | 3.919444957 | 6.633114017 | 1.25E-10    |
| PGM5-AS1   | 0.624607186 | 0.964905954 | 4.737124603 | 3.16E-06    |
| IGDCC4     | 0.625737528 | 1.616826856 | 7.605719106 | 2.65E-13    |
| GPR183     | 0.626101151 | 3.947783483 | 5.185006903 | 3.67E-07    |
| FGF18      | 0.626223701 | 1.895846542 | 5.869154062 | 1.02E-08    |
| SSBP2      | 0.62627253  | 1.935721095 | 7.065609132 | 8.72E-12    |
| CDON       | 0.626942258 | 1.590609678 | 6.36258996  | 6.23E-10    |
| VLDLR      | 0.626965464 | 1.470359949 | 6.99507744  | 1.36E-11    |
| PCDHGB7    | 0.627233354 | 1.542869399 | 7.732281593 | 1.14E-13    |
| CSRNP1     | 0.627501353 | 4.741259959 | 7.471239783 | 6.43E-13    |
| RARB       | 0.628161189 | 2.250571736 | 7.909111575 | 3.45E-14    |
| FGD1       | 0.628392515 | 2.700225551 | 7.465202988 | 6.69E-13    |
| TRPS1      | 0.628754026 | 2.122543204 | 6.324071789 | 7.79E-10    |
| GNA14      | 0.629125982 | 2.327774376 | 6.028598249 | 4.21E-09    |
| HAS1       | 0.629252988 | 0.787815126 | 7.136668027 | 5.56E-12    |
| SIPA1L2    | 0.629507314 | 3.545832497 | 6.385418223 | 5.45E-10    |
| ITPR1      | 0.629634846 | 2.5671232   | 6.610095187 | 1.44E-10    |
| CD200      | 0.629794784 | 3.266666656 | 6.924853712 | 2.10E-11    |
| CARTPT     | 0.629799207 | 0.916974364 | 3.909478902 | 0.000111116 |
| AC093010.2 | 0.630131503 | 4.103296943 | 6.611636106 | 1.43E-10    |
| NCAM1      | 0.630497658 | 1.566184215 | 4.914014877 | 1.37E-06    |
| NOVA1      | 0.631368732 | 0.981838796 | 7.155029286 | 4.95E-12    |

|            |             |             |             |             |
|------------|-------------|-------------|-------------|-------------|
| SEPTIN4    | 0.631636162 | 2.226009599 | 9.2370136   | 2.52E-18    |
| BHLHE41    | 0.632062592 | 4.123554499 | 4.589844172 | 6.20E-06    |
| CALCRL     | 0.632105381 | 3.583722058 | 6.370173294 | 5.96E-10    |
| ADAMTS9    | 0.632324536 | 2.872232722 | 7.007553899 | 1.26E-11    |
| FBXL2      | 0.632385035 | 1.804159338 | 8.451052124 | 7.91E-16    |
| CAPS       | 0.632404086 | 2.954371516 | 5.052905147 | 7.03E-07    |
| AP003555.2 | 0.63309538  | 2.527940557 | 3.940053377 | 9.84E-05    |
| BCL6B      | 0.633390641 | 2.966443119 | 7.574038655 | 3.27E-13    |
| RAP1GAP    | 0.633512017 | 3.880358702 | 4.06720046  | 5.88E-05    |
| LINC00392  | 0.633966531 | 0.686320434 | 3.681265676 | 0.000268756 |
| TMEM130    | 0.634257802 | 1.0689503   | 6.901422636 | 2.43E-11    |
| ARMCX3     | 0.634270324 | 4.380881277 | 7.145880788 | 5.25E-12    |
| MMP17      | 0.634438628 | 1.61686824  | 6.711227916 | 7.81E-11    |
| SLC22A3    | 0.634489322 | 2.817017295 | 4.401228631 | 1.43E-05    |
| KLHDC8B    | 0.634688866 | 3.457617867 | 7.767849511 | 8.97E-14    |
| CHST15     | 0.634734454 | 3.940460036 | 5.243979493 | 2.73E-07    |
| CHI3L2     | 0.634863265 | 1.847289476 | 5.055462781 | 6.94E-07    |
| SLC12A4    | 0.63509055  | 4.145071348 | 8.128086161 | 7.65E-15    |
| NPTX2      | 0.635142278 | 1.338259509 | 5.758971207 | 1.86E-08    |
| SEMA3C     | 0.635626266 | 4.567773229 | 4.631274663 | 5.13E-06    |
| SYN1       | 0.63570466  | 1.599084419 | 7.10091253  | 6.98E-12    |
| NXPH3      | 0.635905146 | 1.076977265 | 5.929789317 | 7.29E-09    |
| TRABD2B    | 0.636188175 | 1.208740065 | 7.671962956 | 1.71E-13    |
| NMNAT2     | 0.636339221 | 1.337127561 | 5.872039746 | 1.00E-08    |
| ISYNA1     | 0.636360963 | 4.451212453 | 4.923925839 | 1.31E-06    |
| ARHGEF15   | 0.636564944 | 2.624188905 | 7.702008743 | 1.39E-13    |
| SNAI2      | 0.636619287 | 3.353204232 | 6.414852894 | 4.59E-10    |
| MACROH2A2  | 0.636748837 | 3.298686061 | 4.625416894 | 5.27E-06    |
| ALDH1A2    | 0.636756213 | 0.721730899 | 7.243725023 | 2.81E-12    |
| DNAJB4     | 0.636832711 | 3.700423189 | 7.864982544 | 4.65E-14    |
| F2RL2      | 0.636964499 | 3.458353092 | 4.867873361 | 1.71E-06    |
| APOLD1     | 0.637132698 | 3.663229971 | 6.292362307 | 9.36E-10    |
| MAP7D3     | 0.637136293 | 2.532685327 | 7.181614895 | 4.18E-12    |
| SEMA6C     | 0.63714674  | 2.102415515 | 7.682468248 | 1.59E-13    |
| TBX2       | 0.637182166 | 3.105626078 | 7.564905361 | 3.47E-13    |
| FNDC5      | 0.637308199 | 1.077490596 | 7.184842815 | 4.10E-12    |
| CYP2U1     | 0.637650888 | 2.221100922 | 7.997486309 | 1.88E-14    |
| DMPK       | 0.637945072 | 4.285603411 | 5.408743205 | 1.18E-07    |
| HEPACAM2   | 0.638144921 | 1.742070715 | 3.138271405 | 0.001844086 |
| EHD3       | 0.638576774 | 2.704213714 | 7.237206586 | 2.93E-12    |
| AC010332.1 | 0.638620481 | 1.294985712 | 6.222024068 | 1.40E-09    |
| TSPAN4     | 0.6388157   | 4.178440248 | 7.626798414 | 2.30E-13    |
| TPBG       | 0.638828004 | 3.209201673 | 6.470238276 | 3.31E-10    |
| TMEM121    | 0.638929775 | 1.761966615 | 7.21738631  | 3.33E-12    |
| CORO2B     | 0.639040306 | 1.160230122 | 8.03392608  | 1.47E-14    |
| PBXIP1     | 0.639745729 | 5.873836767 | 7.712833054 | 1.30E-13    |
| MFSD4A     | 0.640113347 | 2.792884484 | 3.945009844 | 9.65E-05    |
| CBLIF      | 0.640162532 | 1.716577555 | 2.707130842 | 0.007120248 |
| SCGN       | 0.640466839 | 0.951694383 | 4.485171437 | 9.90E-06    |
| GLIPR1     | 0.640526938 | 3.18951463  | 6.056739411 | 3.59E-09    |
| CSRP2      | 0.640879481 | 2.234736818 | 7.938922095 | 2.81E-14    |
| PRRX2      | 0.64092892  | 3.406655183 | 4.372073937 | 1.63E-05    |
| LGALS1     | 0.640951367 | 8.953707898 | 6.017851896 | 4.47E-09    |

|             |             |             |             |             |
|-------------|-------------|-------------|-------------|-------------|
| NCS1        | 0.641144108 | 3.585508277 | 4.674033097 | 4.22E-06    |
| FAM198B-AS1 | 0.641441304 | 1.589371455 | 6.479850436 | 3.13E-10    |
| GGT7        | 0.641619308 | 3.609044225 | 5.265503804 | 2.45E-07    |
| PTGFR       | 0.642376711 | 1.156956726 | 7.513274308 | 4.88E-13    |
| PII5        | 0.643094558 | 1.522937819 | 5.027186584 | 7.97E-07    |
| TCEA2       | 0.643145466 | 3.779961057 | 6.209065971 | 1.51E-09    |
| GSPT2       | 0.643188746 | 2.02457961  | 6.091287946 | 2.96E-09    |
| SUGCT       | 0.643361729 | 1.762083686 | 7.573578223 | 3.28E-13    |
| RGL1        | 0.643381427 | 3.114895771 | 6.874663653 | 2.87E-11    |
| SCGB3A1     | 0.643682002 | 1.484949162 | 3.123026371 | 0.001939551 |
| PARVA       | 0.643843493 | 5.433131819 | 7.899812565 | 3.67E-14    |
| RASSF2      | 0.643892223 | 3.393144843 | 5.505188923 | 7.15E-08    |
| PHGDH       | 0.643929247 | 3.98940175  | 4.154071436 | 4.11E-05    |
| ARHGAP24    | 0.64404227  | 2.672177849 | 7.219541065 | 3.28E-12    |
| JCAD        | 0.644301207 | 3.099045076 | 6.591462096 | 1.61E-10    |
| NUAK1       | 0.64503404  | 2.656304832 | 8.200197002 | 4.63E-15    |
| LBP         | 0.645224399 | 0.858417676 | 4.839474803 | 1.96E-06    |
| CLCF1       | 0.645515001 | 3.603901216 | 6.906309841 | 2.36E-11    |
| PMEPA1      | 0.64574393  | 5.963640391 | 4.559555991 | 7.10E-06    |
| TRIL        | 0.645871934 | 2.0887518   | 6.789933726 | 4.83E-11    |
| FPR1        | 0.646144101 | 2.762151017 | 4.959711826 | 1.10E-06    |
| CHST1       | 0.647152584 | 2.535555694 | 7.094476061 | 7.27E-12    |
| PREX2       | 0.647191648 | 1.548264748 | 8.597958842 | 2.77E-16    |
| CCL2        | 0.647234854 | 5.730043117 | 4.980199769 | 1.00E-06    |
| ACHE        | 0.647360147 | 3.25739626  | 3.682713396 | 0.00026729  |
| PYGL        | 0.647711998 | 3.600388775 | 5.014380897 | 8.48E-07    |
| CP          | 0.647937317 | 2.288456208 | 3.732716592 | 0.000221066 |
| PENK        | 0.648099699 | 1.056390043 | 4.526255305 | 8.24E-06    |
| GRP         | 0.648248839 | 0.948776629 | 5.450042849 | 9.53E-08    |
| ZNF542P     | 0.648333636 | 1.729106075 | 7.408676795 | 9.68E-13    |
| EVA1B       | 0.648454993 | 4.604706652 | 7.742607604 | 1.06E-13    |
| PLPP3       | 0.648864707 | 5.140895858 | 8.199988863 | 4.64E-15    |
| PLEKHG2     | 0.649950476 | 3.726207264 | 7.917231474 | 3.26E-14    |
| ENG         | 0.650162502 | 6.538886069 | 7.625449327 | 2.32E-13    |
| IGHV4-61    | 0.65078513  | 3.694573185 | 2.965882302 | 0.003225833 |
| TGFB1       | 0.650998049 | 6.169208731 | 6.995608575 | 1.35E-11    |
| BNIP3       | 0.651181711 | 3.269076247 | 5.530522663 | 6.27E-08    |
| CARD11      | 0.651699903 | 3.515409791 | 4.278480207 | 2.43E-05    |
| PTHLH       | 0.651716137 | 1.78774861  | 6.344247946 | 6.93E-10    |
| IGF1        | 0.651733202 | 0.862123073 | 7.219187341 | 3.29E-12    |
| NPC1L1      | 0.652005075 | 2.349388202 | 3.28861752  | 0.001109216 |
| TCN2        | 0.652280791 | 4.203825216 | 6.545973935 | 2.11E-10    |
| FKBP7       | 0.652379989 | 3.128554815 | 9.510369746 | 3.18E-19    |
| CXCL6       | 0.652484217 | 2.328088334 | 3.705765548 | 0.000244951 |
| GSTM3       | 0.652596514 | 4.050103213 | 4.783171442 | 2.55E-06    |
| ZNF528      | 0.652987941 | 1.793645219 | 6.28268945  | 9.90E-10    |
| AFAP1L1     | 0.653299025 | 2.494306212 | 8.788660465 | 6.96E-17    |
| FAM171B     | 0.653327179 | 1.848268168 | 8.499695751 | 5.60E-16    |
| MEF2C       | 0.653367911 | 3.051667417 | 6.565233559 | 1.88E-10    |
| CCN4        | 0.654372119 | 2.542800061 | 5.767020651 | 1.78E-08    |
| TGFBR2      | 0.654785593 | 6.198739712 | 6.879175501 | 2.79E-11    |
| CDHR2       | 0.655056923 | 3.541783712 | 3.2559422   | 0.001240807 |
| SEMA7A      | 0.655358055 | 3.037146614 | 6.016229937 | 4.51E-09    |

|            |             |             |             |             |
|------------|-------------|-------------|-------------|-------------|
| IGHV3-11   | 0.655712791 | 5.056331227 | 2.687164981 | 0.007550823 |
| RAB32      | 0.655727787 | 4.779802357 | 6.780745009 | 5.11E-11    |
| TM4SF5     | 0.655805537 | 4.828828095 | 3.667084423 | 0.000283512 |
| HSPA12B    | 0.656277763 | 2.541442281 | 7.883915355 | 4.09E-14    |
| LRRC4B     | 0.657142222 | 1.621050535 | 7.707415496 | 1.35E-13    |
| PPP2R3A    | 0.657337551 | 2.277151251 | 6.872466715 | 2.91E-11    |
| FGL1       | 0.657407244 | 0.663959925 | 4.94613559  | 1.18E-06    |
| DIP2C      | 0.657424961 | 3.033715852 | 7.845063329 | 5.32E-14    |
| CRTAC1     | 0.657523919 | 0.755746826 | 7.440921134 | 7.84E-13    |
| FBXO27     | 0.657564733 | 1.798768311 | 5.758359266 | 1.86E-08    |
| KIF3C      | 0.657744993 | 2.315786363 | 7.248057567 | 2.73E-12    |
| LPP        | 0.657840155 | 5.488422622 | 5.891227594 | 9.02E-09    |
| TRPC1      | 0.658352032 | 1.343490044 | 8.766914091 | 8.16E-17    |
| NAP1L3     | 0.658412087 | 1.076942249 | 8.730439816 | 1.06E-16    |
| ANXA6      | 0.659447704 | 6.096283785 | 5.847342888 | 1.15E-08    |
| NEU1       | 0.660638986 | 4.178093756 | 5.266534344 | 2.44E-07    |
| ADAMTS12   | 0.660931662 | 2.752358564 | 5.48748868  | 7.85E-08    |
| THRB       | 0.661136664 | 2.369397299 | 5.719733913 | 2.29E-08    |
| KLHL5      | 0.661317773 | 4.366631158 | 6.898562697 | 2.48E-11    |
| COL4A1     | 0.661445842 | 7.402854759 | 6.423868368 | 4.35E-10    |
| TENM3      | 0.661520905 | 1.176972833 | 6.797243988 | 4.62E-11    |
| ST3GAL1    | 0.6616048   | 3.959815576 | 6.46990427  | 3.32E-10    |
| MARK1      | 0.661959379 | 1.671409913 | 6.270595275 | 1.06E-09    |
| MAPK4      | 0.662116374 | 0.858617467 | 5.957082476 | 6.27E-09    |
| ROR1       | 0.662221044 | 2.678342497 | 6.478332707 | 3.15E-10    |
| HHEX       | 0.662248601 | 3.762128101 | 5.853207853 | 1.11E-08    |
| COL15A1    | 0.662736443 | 5.826720472 | 5.391281949 | 1.29E-07    |
| PLEKHA4    | 0.662991338 | 4.541973599 | 5.946506883 | 6.65E-09    |
| NPR3       | 0.663025745 | 0.93888506  | 7.584808126 | 3.04E-13    |
| RFTN1      | 0.663087952 | 4.529558295 | 6.540061985 | 2.19E-10    |
| SOCS3      | 0.663499379 | 6.077822195 | 6.510189197 | 2.61E-10    |
| SUSD2      | 0.663612673 | 2.832810695 | 6.295303287 | 9.21E-10    |
| ISLR2      | 0.663815809 | 1.122391414 | 8.480608974 | 6.41E-16    |
| CCL11      | 0.664071041 | 4.013766558 | 4.05377594  | 6.22E-05    |
| NR3C1      | 0.664689829 | 3.642201913 | 7.114195774 | 6.42E-12    |
| RASIP1     | 0.664896693 | 3.129868582 | 7.914376829 | 3.32E-14    |
| PALMD      | 0.665528048 | 2.17026706  | 7.28667219  | 2.13E-12    |
| SPSB1      | 0.665539405 | 4.927924902 | 8.831644428 | 5.09E-17    |
| UGT2B15    | 0.665546735 | 1.749277543 | 3.987581449 | 8.13E-05    |
| DCLK2      | 0.665791506 | 1.522388257 | 7.402758859 | 1.01E-12    |
| RGL3       | 0.665796459 | 2.399836703 | 4.368194306 | 1.65E-05    |
| NPY1R      | 0.665903128 | 0.756472052 | 7.228984915 | 3.09E-12    |
| PEAR1      | 0.665910743 | 2.394418774 | 8.301966118 | 2.27E-15    |
| PRDM5      | 0.665965419 | 1.153186664 | 9.580815956 | 1.86E-19    |
| LTBP4      | 0.666853119 | 6.355588916 | 6.344043591 | 6.94E-10    |
| CHST10     | 0.66699818  | 2.070171064 | 7.565098364 | 3.47E-13    |
| HOXC10     | 0.667019696 | 3.066624495 | 2.934286064 | 0.003564194 |
| PTPRS      | 0.667500386 | 3.327456563 | 4.804997152 | 2.30E-06    |
| LGI4       | 0.667785075 | 1.619356652 | 7.604199644 | 2.68E-13    |
| FZD1       | 0.668304408 | 3.497495959 | 7.575457263 | 3.24E-13    |
| TANC2      | 0.668383949 | 2.539638402 | 6.689822504 | 8.89E-11    |
| SYT13      | 0.669124525 | 3.69291319  | 3.393358391 | 0.000769665 |
| AC239859.5 | 0.669236808 | 1.594015548 | 6.56758995  | 1.86E-10    |



|            |             |             |             |             |
|------------|-------------|-------------|-------------|-------------|
| SLC4A3     | 0.669240368 | 1.524783052 | 5.910339819 | 8.12E-09    |
| RGN        | 0.669268441 | 1.676146267 | 5.096882171 | 5.67E-07    |
| SH3RF3-AS1 | 0.669459454 | 1.513388108 | 8.797343883 | 6.53E-17    |
| EMID1      | 0.670094906 | 2.667955747 | 5.640438075 | 3.51E-08    |
| FZD4       | 0.670496426 | 3.032305941 | 8.480849048 | 6.40E-16    |
| PRDM8      | 0.670802839 | 1.667026103 | 6.956641903 | 1.73E-11    |
| SOBP       | 0.670868049 | 2.296374479 | 5.957370731 | 6.26E-09    |
| SNHG14     | 0.671032443 | 1.821354636 | 5.910244669 | 8.12E-09    |
| NINL       | 0.671319207 | 2.545265688 | 5.600205165 | 4.34E-08    |
| HGF        | 0.672806139 | 1.772799259 | 7.181350424 | 4.19E-12    |
| PRSS1      | 0.673236848 | 2.156814752 | 2.846824889 | 0.00467674  |
| SERP2      | 0.673247594 | 1.904674111 | 6.740530987 | 6.54E-11    |
| HSD17B14   | 0.673410038 | 3.094619059 | 6.217328941 | 1.44E-09    |
| TSPAN7     | 0.673428334 | 3.321357325 | 4.924568342 | 1.31E-06    |
| PXDC1      | 0.673659477 | 4.472613896 | 7.953549826 | 2.54E-14    |
| KIAA1755   | 0.674220455 | 1.906911259 | 7.698717635 | 1.43E-13    |
| POPDC2     | 0.674239712 | 2.145463142 | 4.861752921 | 1.76E-06    |
| LXN        | 0.674705148 | 4.744816061 | 6.638080153 | 1.22E-10    |
| OLFML2A    | 0.674828524 | 3.544706424 | 7.021261808 | 1.15E-11    |
| C1QTNF2    | 0.674843285 | 1.183333491 | 9.646137481 | 1.12E-19    |
| FZD7       | 0.675059271 | 3.813798965 | 5.815310533 | 1.37E-08    |
| ZEB2       | 0.675278497 | 3.204259749 | 6.704071131 | 8.16E-11    |
| PCDHB4     | 0.67541095  | 1.26146141  | 9.477608705 | 4.09E-19    |
| ROBO1      | 0.675450918 | 3.460863684 | 6.478428383 | 3.15E-10    |
| C1QTNF3    | 0.675475887 | 2.07122338  | 6.050433181 | 3.72E-09    |
| GLRB       | 0.676573027 | 1.079901877 | 8.993940275 | 1.54E-17    |
| VIPR2      | 0.676700473 | 0.87494463  | 7.688039299 | 1.53E-13    |
| EMCN       | 0.67679568  | 2.84439839  | 7.632775715 | 2.21E-13    |
| P2RY14     | 0.677240448 | 2.080163595 | 6.072409155 | 3.29E-09    |
| EBF1       | 0.677414804 | 2.436935084 | 7.161236603 | 4.76E-12    |
| ARHGAP31   | 0.677903111 | 2.952340691 | 7.701030412 | 1.40E-13    |
| PLXDC1     | 0.678335958 | 2.889126261 | 8.637039234 | 2.09E-16    |
| LYVE1      | 0.678519676 | 1.715905629 | 6.519143257 | 2.48E-10    |
| AQP1       | 0.678751401 | 6.299607361 | 4.401560604 | 1.43E-05    |
| CERS4      | 0.67876723  | 3.158499829 | 4.793002035 | 2.43E-06    |
| NPTX1      | 0.678825471 | 0.992358987 | 5.004499434 | 8.90E-07    |
| ANO5       | 0.679259791 | 1.366576113 | 6.731463435 | 6.91E-11    |
| SEMA3E     | 0.67988887  | 1.213574299 | 5.781963757 | 1.64E-08    |
| PRAF2      | 0.679976466 | 4.631567536 | 8.375168616 | 1.36E-15    |
| SPP1       | 0.680150825 | 6.343478345 | 3.037290015 | 0.002566711 |
| CPVL       | 0.680812211 | 4.72676845  | 4.819200675 | 2.15E-06    |
| HSPA1A     | 0.681239826 | 5.311600138 | 4.548186238 | 7.47E-06    |
| SLC16A7    | 0.681444919 | 1.553383978 | 7.562794105 | 3.52E-13    |
| QPCT       | 0.681633495 | 3.276259112 | 4.620592398 | 5.39E-06    |
| PRICKLE1   | 0.681718609 | 1.349453492 | 8.674316762 | 1.60E-16    |
| OLFM2      | 0.682264328 | 3.416357143 | 5.158605377 | 4.18E-07    |
| FRY        | 0.683737857 | 2.178501353 | 8.555455719 | 3.76E-16    |
| WNT5A-AS1  | 0.683895708 | 2.117476902 | 6.701044434 | 8.31E-11    |
| GALNT17    | 0.684504397 | 1.146055177 | 9.279677523 | 1.83E-18    |
| LAMB2      | 0.684718013 | 6.04206467  | 7.262571449 | 2.49E-12    |
| SEMA3G     | 0.685196764 | 2.23749793  | 7.59464347  | 2.85E-13    |
| TCIM       | 0.685651736 | 4.985774051 | 5.065624503 | 6.61E-07    |
| SULF2      | 0.685891692 | 6.04512213  | 5.778602205 | 1.67E-08    |

|            |             |             |             |             |
|------------|-------------|-------------|-------------|-------------|
| MIR99AHG   | 0.686029097 | 1.050701423 | 8.338141246 | 1.76E-15    |
| SPIRE1     | 0.686252098 | 2.594971248 | 6.837957276 | 3.60E-11    |
| PYGO1      | 0.686364089 | 1.35373125  | 8.290202714 | 2.47E-15    |
| AC254633.1 | 0.686470789 | 1.653651519 | 7.734010437 | 1.13E-13    |
| GPR176     | 0.686548758 | 2.528154167 | 8.045209763 | 1.36E-14    |
| SNCAIP     | 0.686938126 | 1.594641625 | 5.265599273 | 2.45E-07    |
| AL139393.3 | 0.686988429 | 1.651071428 | 7.479276242 | 6.10E-13    |
| SNORD116-4 | 0.687048448 | 1.096415096 | 5.989116443 | 5.24E-09    |
| TNN        | 0.687091691 | 0.860685511 | 7.331285063 | 1.60E-12    |
| PLEKHH2    | 0.687162809 | 2.0964383   | 6.833297926 | 3.70E-11    |
| GSTM5      | 0.687271456 | 1.128291442 | 8.651992797 | 1.88E-16    |
| PYGM       | 0.687520154 | 1.253208987 | 6.204697993 | 1.55E-09    |
| XPNPEP2    | 0.687621357 | 1.946935879 | 3.756724219 | 0.000201655 |
| GPRASP1    | 0.688207508 | 1.477679893 | 7.079309114 | 8.00E-12    |
| MTSS1      | 0.688636111 | 3.325265615 | 6.012975249 | 4.59E-09    |
| CD36       | 0.688998941 | 2.315702575 | 6.0425763   | 3.89E-09    |
| TNNC1      | 0.6891207   | 2.59007353  | 4.260395667 | 2.63E-05    |
| GLI2       | 0.689203421 | 2.205781409 | 6.623672266 | 1.33E-10    |
| SCN1B      | 0.689489578 | 1.855129617 | 8.576360344 | 3.23E-16    |
| SLC2A4     | 0.689732216 | 1.719379331 | 4.979263312 | 1.00E-06    |
| TEK        | 0.689778516 | 2.419532568 | 8.036929595 | 1.44E-14    |
| MMP19      | 0.689845669 | 2.897397628 | 7.375526016 | 1.20E-12    |
| PLPPR4     | 0.689947972 | 1.404295403 | 7.579300393 | 3.16E-13    |
| KCTD15     | 0.691557266 | 3.073073559 | 6.99734098  | 1.34E-11    |
| MOCS1      | 0.69236358  | 2.502877242 | 8.132911064 | 7.40E-15    |
| SYNE1      | 0.692685152 | 2.089154706 | 6.658438284 | 1.08E-10    |
| CALHM2     | 0.6931162   | 3.946101451 | 7.84396509  | 5.36E-14    |
| TPD52L1    | 0.693188943 | 2.968317357 | 4.596149303 | 6.02E-06    |
| RNF180     | 0.693233324 | 1.229236058 | 9.6152694   | 1.43E-19    |
| MMP14      | 0.693653347 | 7.189236417 | 6.980525705 | 1.49E-11    |
| MGLL       | 0.693663196 | 5.587139106 | 6.285405561 | 9.75E-10    |
| CST6       | 0.693667077 | 1.448709946 | 4.263669379 | 2.59E-05    |
| PLP1       | 0.693689266 | 0.85415249  | 6.084717761 | 3.07E-09    |
| AP003071.4 | 0.694254561 | 1.144368493 | 6.570402312 | 1.82E-10    |
| DCDC2      | 0.694585207 | 1.372574413 | 5.353409181 | 1.57E-07    |
| CDH5       | 0.694810172 | 4.533945578 | 7.423924101 | 8.76E-13    |
| TCF4       | 0.694903659 | 3.942346562 | 7.444894997 | 7.64E-13    |
| LRRN2      | 0.694985925 | 1.467482979 | 7.280413063 | 2.22E-12    |
| GPSM1      | 0.695476238 | 2.671946686 | 6.546884119 | 2.10E-10    |
| GRASP      | 0.695668922 | 3.251650855 | 8.194524946 | 4.82E-15    |
| TNFSF12    | 0.696293784 | 4.231051161 | 7.763251622 | 9.25E-14    |
| ZFPM2-AS1  | 0.69676666  | 1.390875593 | 5.520053464 | 6.62E-08    |
| FXYD1      | 0.696902341 | 1.227212876 | 7.63464478  | 2.19E-13    |
| TMEM204    | 0.696915998 | 4.128138803 | 8.732465968 | 1.05E-16    |
| MYOM1      | 0.696977474 | 1.501901619 | 6.596005123 | 1.57E-10    |
| CPM        | 0.697543679 | 3.410480496 | 5.596960499 | 4.42E-08    |
| HOXB2      | 0.697568103 | 3.799473954 | 5.900726833 | 8.56E-09    |
| PCP4L1     | 0.697985795 | 1.203193309 | 4.854806914 | 1.82E-06    |
| CD302      | 0.69810761  | 2.574532968 | 7.291384408 | 2.07E-12    |
| ARHGEF4    | 0.698357668 | 2.056230578 | 5.109837007 | 5.32E-07    |
| TGFB2      | 0.698401915 | 1.946368017 | 7.110538922 | 6.57E-12    |
| CCDC69     | 0.698458013 | 4.30831658  | 5.217108817 | 3.12E-07    |
| C5AR1      | 0.698527995 | 4.15615209  | 5.88032472  | 9.58E-09    |

|           |             |             |             |             |
|-----------|-------------|-------------|-------------|-------------|
| ZBTB10    | 0.698790713 | 2.381996577 | 7.026644475 | 1.11E-11    |
| COL18A1   | 0.698790772 | 5.929679336 | 6.499667925 | 2.78E-10    |
| CFL2      | 0.69947911  | 3.154676438 | 5.790926238 | 1.56E-08    |
| ARL14     | 0.699696399 | 4.042415679 | 3.899273957 | 0.000115699 |
| FHL5      | 0.699710258 | 1.559549374 | 8.482090085 | 6.35E-16    |
| ARHGEF10  | 0.700121223 | 3.206400525 | 7.041762341 | 1.01E-11    |
| SNED1     | 0.700141035 | 2.453218577 | 7.457051312 | 7.06E-13    |
| KLF7      | 0.700424108 | 3.067575055 | 8.066643375 | 1.17E-14    |
| SPINK1    | 0.70043804  | 7.796272811 | 2.800215389 | 0.005390861 |
| TACC1     | 0.700598775 | 5.264904226 | 6.980727062 | 1.49E-11    |
| GPRC5B    | 0.701447277 | 4.221875164 | 4.41977334  | 1.32E-05    |
| TSPAN11   | 0.701649754 | 2.311858761 | 6.29187969  | 9.39E-10    |
| CD34      | 0.701677418 | 3.928719155 | 8.164932583 | 5.92E-15    |
| TENT5B    | 0.702003935 | 2.221682976 | 4.738668042 | 3.14E-06    |
| VEGFC     | 0.702258256 | 3.138720265 | 8.509116342 | 5.23E-16    |
| CXCL14    | 0.703153504 | 5.794833381 | 3.347817266 | 0.000903245 |
| CTSG      | 0.70340902  | 1.000586934 | 6.396382596 | 5.11E-10    |
| CPQ       | 0.703769328 | 4.621451715 | 7.567970323 | 3.40E-13    |
| MEIS1     | 0.704115285 | 3.023658229 | 6.572660504 | 1.80E-10    |
| DIXDC1    | 0.704866821 | 3.074388377 | 6.071915157 | 3.30E-09    |
| AQP3      | 0.705214377 | 4.022043338 | 4.020956362 | 7.11E-05    |
| PDE7B     | 0.705274488 | 1.437837541 | 7.262830735 | 2.49E-12    |
| PBX1      | 0.705347325 | 3.431123498 | 6.470253247 | 3.31E-10    |
| B3GNT7    | 0.706129803 | 4.740968311 | 4.300109813 | 2.22E-05    |
| CYP7B1    | 0.706160864 | 1.805231624 | 7.196014698 | 3.81E-12    |
| SMTN      | 0.706232908 | 5.576220374 | 5.508293958 | 7.04E-08    |
| SEMA6B    | 0.706334004 | 3.336757545 | 8.021888748 | 1.59E-14    |
| SV2A      | 0.706777404 | 1.768627879 | 7.560406391 | 3.58E-13    |
| CDH6      | 0.706979463 | 1.803981456 | 10.34740808 | 4.58E-22    |
| BCHE      | 0.70719377  | 1.084295827 | 5.799474921 | 1.49E-08    |
| ASB2      | 0.707290119 | 2.634797183 | 4.419125953 | 1.32E-05    |
| PLXNA4    | 0.70732827  | 1.074635314 | 7.755565456 | 9.74E-14    |
| VANGL2    | 0.707982078 | 2.566011292 | 4.768544377 | 2.73E-06    |
| MAP9      | 0.708125242 | 1.740715425 | 7.83346114  | 5.76E-14    |
| FADS1     | 0.708127097 | 3.436710238 | 5.995669863 | 5.06E-09    |
| TMEM45A   | 0.70883827  | 2.287804608 | 7.856580387 | 4.92E-14    |
| CST1      | 0.708886146 | 5.95418184  | 2.637693123 | 0.008720436 |
| MAGI2-AS3 | 0.709629479 | 1.693205309 | 8.8462298   | 4.57E-17    |
| CYYR1     | 0.709895797 | 3.232727114 | 8.491479139 | 5.93E-16    |
| ANKRD6    | 0.710652184 | 1.571292969 | 9.630562716 | 1.27E-19    |
| ERRFI1    | 0.711885241 | 5.566452761 | 7.019587123 | 1.16E-11    |
| ADAMTS2   | 0.712098798 | 4.177460027 | 5.001122742 | 9.04E-07    |
| RIMKLB    | 0.712723267 | 2.031947036 | 6.491517151 | 2.92E-10    |
| TGM2      | 0.713236989 | 6.957503123 | 5.253729473 | 2.60E-07    |
| PCOLCE2   | 0.713238476 | 1.191683102 | 6.949648981 | 1.80E-11    |
| SOGA1     | 0.713414903 | 3.506589602 | 6.810018063 | 4.27E-11    |
| TCEAL9    | 0.713804071 | 6.195216597 | 6.447810027 | 3.78E-10    |
| GJA4      | 0.713813024 | 3.845224985 | 7.838109166 | 5.58E-14    |
| GNG11     | 0.713862097 | 3.690838631 | 8.394433989 | 1.18E-15    |
| HHIP-AS1  | 0.713906449 | 1.259294089 | 8.199972965 | 4.64E-15    |
| FAM13C    | 0.714520704 | 1.575396048 | 8.052226957 | 1.29E-14    |
| LEPR      | 0.714565697 | 1.96161916  | 7.592321408 | 2.90E-13    |
| HDGFL3    | 0.714603998 | 1.95984037  | 8.108410959 | 8.77E-15    |

|            |             |             |             |             |
|------------|-------------|-------------|-------------|-------------|
| ZBTB47     | 0.715179529 | 3.421967797 | 7.997766175 | 1.88E-14    |
| RASSF8-AS1 | 0.715415039 | 1.445554924 | 8.663398692 | 1.73E-16    |
| MSC        | 0.71546266  | 3.4259818   | 7.246539222 | 2.76E-12    |
| AP005018.2 | 0.716246857 | 1.518307573 | 5.16708601  | 4.01E-07    |
| MYADM      | 0.716297284 | 7.252088599 | 7.34324646  | 1.48E-12    |
| TEAD2      | 0.716960939 | 4.138228496 | 7.08097057  | 7.92E-12    |
| ADAMTS10   | 0.717415267 | 2.078229565 | 8.26222773  | 3.00E-15    |
| FZD8       | 0.717631768 | 3.397755671 | 6.193855466 | 1.65E-09    |
| IGHV1-69D  | 0.717688455 | 5.55839643  | 2.778778085 | 0.005751381 |
| SAMD4A     | 0.717869926 | 2.85901451  | 7.173915769 | 4.39E-12    |
| PTGER2     | 0.717962897 | 3.123380339 | 5.608044417 | 4.16E-08    |
| IL34       | 0.718061378 | 2.56155845  | 7.017382749 | 1.18E-11    |
| PIP4P2     | 0.7188329   | 2.853005576 | 8.300345188 | 2.30E-15    |
| MSLN       | 0.718899908 | 5.285462307 | 2.623517282 | 0.009084312 |
| FOXC2      | 0.718943893 | 1.448246491 | 7.804471456 | 7.01E-14    |
| CFH        | 0.719330087 | 4.065597735 | 5.740971374 | 2.05E-08    |
| NR2F1-AS1  | 0.719487771 | 1.520974859 | 9.109995193 | 6.52E-18    |
| KCTD12     | 0.720071587 | 5.463614943 | 5.792820557 | 1.55E-08    |
| RNF144A    | 0.721088924 | 2.979039612 | 7.993564075 | 1.93E-14    |
| DUSP5      | 0.721188266 | 4.010042922 | 6.111179326 | 2.64E-09    |
| QKI        | 0.721263244 | 3.823711197 | 8.387162007 | 1.25E-15    |
| KIAA1324L  | 0.721502159 | 1.678293723 | 6.680628097 | 9.40E-11    |
| IGHG4      | 0.721876439 | 7.288714505 | 2.875905441 | 0.00427592  |
| PXDN       | 0.722342608 | 4.72526551  | 7.078257367 | 8.05E-12    |
| VIM        | 0.722669223 | 8.434524569 | 7.855157174 | 4.97E-14    |
| POSTN      | 0.723290244 | 6.805252688 | 4.741704632 | 3.09E-06    |
| FUZ        | 0.723295052 | 3.091466738 | 6.261163234 | 1.12E-09    |
| GPNMB      | 0.723583707 | 6.267851558 | 4.85272021  | 1.84E-06    |
| REEP1      | 0.72412459  | 1.927870888 | 5.509258506 | 7.00E-08    |
| SEPTIN5    | 0.724794322 | 2.1887535   | 7.526485793 | 4.47E-13    |
| MPV17L     | 0.724797345 | 1.922395303 | 5.779002675 | 1.67E-08    |
| CPT1C      | 0.724892047 | 1.935215773 | 7.438946327 | 7.94E-13    |
| A4GNT      | 0.725252503 | 1.64708409  | 3.821115524 | 0.000157227 |
| PAMR1      | 0.725377689 | 2.010357069 | 8.489615878 | 6.01E-16    |
| IGFBPL1    | 0.725682148 | 1.456204523 | 4.974884201 | 1.03E-06    |
| ZNF331     | 0.727394601 | 2.602046724 | 7.143121321 | 5.34E-12    |
| APLP1      | 0.727584049 | 2.44996442  | 4.776276838 | 2.63E-06    |
| FBXL22     | 0.728167328 | 1.884962595 | 6.310570833 | 8.43E-10    |
| ECM2       | 0.72843801  | 2.851692656 | 7.684693727 | 1.57E-13    |
| STMN2      | 0.728526006 | 1.083833271 | 6.198125623 | 1.61E-09    |
| PCBP3      | 0.728812948 | 1.807673286 | 6.780174713 | 5.13E-11    |
| CADM3      | 0.729197668 | 1.030787006 | 6.648981806 | 1.14E-10    |
| CSRP1      | 0.729378589 | 6.042899297 | 6.11901521  | 2.53E-09    |
| RAI14      | 0.730064186 | 4.747297339 | 9.288116178 | 1.72E-18    |
| FAM162B    | 0.730227413 | 1.668656769 | 10.67859608 | 3.18E-23    |
| PKD2       | 0.73189511  | 3.685243862 | 8.139908243 | 7.05E-15    |
| FAM174B    | 0.731913753 | 3.702816297 | 6.689450403 | 8.91E-11    |
| OLFM1      | 0.732254276 | 2.657427319 | 5.66937157  | 3.01E-08    |
| FGD5       | 0.732290643 | 3.198651928 | 7.801911235 | 7.13E-14    |
| GSDME      | 0.732333129 | 2.121290633 | 7.397574865 | 1.04E-12    |
| DZIP1      | 0.732339053 | 1.666787829 | 8.745633211 | 9.52E-17    |
| ANGPTL4    | 0.733185277 | 3.244769841 | 5.655694869 | 3.23E-08    |
| TSPAN9     | 0.733196119 | 3.934597373 | 8.553476954 | 3.81E-16    |

|            |             |             |             |             |
|------------|-------------|-------------|-------------|-------------|
| ZNF134     | 0.73325671  | 2.455784158 | 7.525732698 | 4.50E-13    |
| PHLDA3     | 0.733466019 | 4.703559392 | 5.880399998 | 9.57E-09    |
| TUB        | 0.733717937 | 1.06355165  | 9.059869078 | 9.47E-18    |
| CRIP2      | 0.733900417 | 5.904140669 | 7.850930297 | 5.12E-14    |
| FOXS1      | 0.734131881 | 2.931518408 | 6.557286194 | 1.97E-10    |
| ZFHX4      | 0.734138708 | 1.139994432 | 8.299455149 | 2.31E-15    |
| DBN1       | 0.735459534 | 5.192467373 | 6.97205507  | 1.57E-11    |
| PLAC9      | 0.735628716 | 3.270206378 | 6.735092421 | 6.76E-11    |
| GADD45B    | 0.735792893 | 4.873249507 | 7.705435803 | 1.36E-13    |
| TMEM88     | 0.736506356 | 3.104973141 | 7.727166248 | 1.18E-13    |
| DTX3       | 0.736584353 | 3.183459532 | 6.659707752 | 1.07E-10    |
| ITGA1      | 0.73685659  | 4.394660145 | 7.046272986 | 9.85E-12    |
| NHSL2      | 0.73827055  | 1.318957278 | 7.927705065 | 3.04E-14    |
| COX7A1     | 0.738991064 | 3.843172027 | 7.723669927 | 1.21E-13    |
| LZTS1      | 0.739228136 | 2.401811946 | 7.771324003 | 8.76E-14    |
| ID4        | 0.739337864 | 3.278194216 | 6.301541694 | 8.88E-10    |
| CREB3L3    | 0.739474601 | 2.05187658  | 3.924532349 | 0.000104668 |
| FAM229B    | 0.739785459 | 1.839302139 | 9.470751581 | 4.31E-19    |
| TMEM35A    | 0.740153657 | 1.043507084 | 6.611083335 | 1.43E-10    |
| MCC        | 0.740242553 | 2.243094892 | 8.089107811 | 1.00E-14    |
| NR2F2      | 0.740640335 | 5.333147403 | 8.06760244  | 1.16E-14    |
| NACAD      | 0.740717757 | 1.234425453 | 8.734725109 | 1.03E-16    |
| VSIG2      | 0.741055623 | 5.143663858 | 3.034468659 | 0.002590209 |
| NBEA       | 0.741516922 | 1.284328561 | 7.465015539 | 6.70E-13    |
| EFNA5      | 0.741752616 | 2.122327006 | 7.228886033 | 3.09E-12    |
| PKIG       | 0.74219984  | 5.381841154 | 8.231252909 | 3.73E-15    |
| BEND5      | 0.742786169 | 1.249356374 | 8.43785474  | 8.69E-16    |
| DCLK1      | 0.742959328 | 1.262877956 | 6.979674977 | 1.50E-11    |
| MXRA7P1    | 0.743021803 | 1.983404967 | 7.177066616 | 4.30E-12    |
| P4HA3      | 0.743296796 | 1.786880941 | 9.084501473 | 7.89E-18    |
| GSN        | 0.743853521 | 6.892475502 | 7.373355582 | 1.22E-12    |
| GJC1       | 0.743871716 | 2.11699381  | 7.442893522 | 7.74E-13    |
| PLIN2      | 0.744367894 | 5.374833959 | 6.966880396 | 1.62E-11    |
| RHOB       | 0.744754035 | 7.840353873 | 6.922763381 | 2.13E-11    |
| AF001548.1 | 0.745065669 | 1.153235841 | 5.768041174 | 1.77E-08    |
| TCF21      | 0.745590143 | 1.844846742 | 8.603641071 | 2.66E-16    |
| PTCH2      | 0.746312514 | 1.577459954 | 6.747399337 | 6.27E-11    |
| PECAM1     | 0.746423448 | 5.533587733 | 7.530546995 | 4.36E-13    |
| DIPK2B     | 0.746430611 | 2.810364794 | 9.090962881 | 7.52E-18    |
| DLG4       | 0.746590255 | 2.479125838 | 9.603661793 | 1.56E-19    |
| RARRES1    | 0.747405259 | 4.594172856 | 4.498144123 | 9.34E-06    |
| DAB2       | 0.748515988 | 4.867082843 | 8.01736919  | 1.64E-14    |
| PCDH18     | 0.748667489 | 3.251415538 | 8.149949776 | 6.57E-15    |
| SHISAL1    | 0.748688701 | 1.294542167 | 6.054952769 | 3.63E-09    |
| EDNRB      | 0.748832702 | 2.967966973 | 7.487034264 | 5.80E-13    |
| CD109      | 0.749042565 | 2.320264026 | 6.430834375 | 4.17E-10    |
| EPDR1      | 0.74924136  | 3.180596957 | 6.050711482 | 3.72E-09    |
| RAB3B      | 0.749288668 | 1.426113433 | 7.06842837  | 8.57E-12    |
| TP73-AS1   | 0.749378017 | 1.877307016 | 8.325568262 | 1.92E-15    |
| CLEC14A    | 0.749737513 | 4.022884875 | 8.559639987 | 3.64E-16    |
| C20orf194  | 0.749757662 | 2.698918007 | 7.696793515 | 1.44E-13    |
| TIE1       | 0.749943575 | 3.675004957 | 8.222515541 | 3.96E-15    |
| GNB4       | 0.750197405 | 3.394290961 | 7.540684543 | 4.07E-13    |

|           |             |             |             |             |
|-----------|-------------|-------------|-------------|-------------|
| PNMA2     | 0.750734771 | 1.866725008 | 6.164635394 | 1.95E-09    |
| PDGFC     | 0.750953514 | 3.100274137 | 8.606109691 | 2.61E-16    |
| TF        | 0.751250088 | 0.885831984 | 4.694648803 | 3.84E-06    |
| LIX1L     | 0.751330746 | 4.026284154 | 7.752181197 | 9.96E-14    |
| ALPL      | 0.751362845 | 2.895376978 | 6.646307499 | 1.16E-10    |
| HBB       | 0.751422541 | 5.072585188 | 4.004735985 | 7.59E-05    |
| PDZRN4    | 0.751876915 | 0.988437001 | 6.079529698 | 3.16E-09    |
| EDIL3     | 0.752086372 | 3.878759874 | 7.626792847 | 2.30E-13    |
| GLI3      | 0.752289527 | 1.793166062 | 7.867346319 | 4.58E-14    |
| SCTR      | 0.752330622 | 1.133193348 | 5.858923241 | 1.08E-08    |
| CC2D2A    | 0.752920313 | 2.307141957 | 9.725247947 | 6.11E-20    |
| NEGR1     | 0.753004424 | 1.358852907 | 7.399874848 | 1.02E-12    |
| APLNR     | 0.753559796 | 4.324577045 | 6.019691571 | 4.42E-09    |
| ALKAL1    | 0.75386087  | 1.633089229 | 6.937389259 | 1.95E-11    |
| TMEM59L   | 0.754250065 | 0.961592733 | 8.365007227 | 1.46E-15    |
| VGLL3     | 0.754278627 | 1.697477327 | 7.906740799 | 3.50E-14    |
| TPM1      | 0.754992312 | 6.945436547 | 6.801881637 | 4.49E-11    |
| ERG       | 0.755240437 | 2.611866299 | 9.291582766 | 1.67E-18    |
| ABLM3     | 0.755280442 | 3.033292877 | 6.56304967  | 1.91E-10    |
| F2R       | 0.755708563 | 5.36499257  | 7.796951613 | 7.37E-14    |
| TFPI2     | 0.755902284 | 1.632498593 | 5.836116602 | 1.22E-08    |
| SCUBE2    | 0.756608008 | 1.654255011 | 7.053450924 | 9.42E-12    |
| CDK14     | 0.757338741 | 2.78960261  | 7.148463026 | 5.16E-12    |
| PRKAR2B   | 0.757866637 | 2.7444142   | 6.245580003 | 1.23E-09    |
| COL6A1    | 0.758158552 | 7.654024484 | 6.476655975 | 3.19E-10    |
| CNTN4     | 0.758235928 | 1.540517526 | 9.244445946 | 2.39E-18    |
| RAMP2     | 0.758910658 | 5.893828373 | 7.992705829 | 1.95E-14    |
| AGTR1     | 0.75927522  | 1.009771186 | 6.17846548  | 1.80E-09    |
| TIMP1     | 0.759480803 | 9.888916662 | 7.373526072 | 1.22E-12    |
| CILP2     | 0.759762301 | 1.38188627  | 6.203527139 | 1.56E-09    |
| HTRA1     | 0.760298468 | 6.128217291 | 7.187813531 | 4.02E-12    |
| COL4A4    | 0.760392264 | 1.348413625 | 7.160676808 | 4.78E-12    |
| CDA       | 0.760479993 | 4.17802787  | 4.27655267  | 2.45E-05    |
| CBX6      | 0.760622333 | 4.175604112 | 5.928511143 | 7.34E-09    |
| ARHGEF26  | 0.760648655 | 1.984055151 | 6.240908621 | 1.26E-09    |
| FILIP1    | 0.76081774  | 1.844600921 | 6.443931114 | 3.86E-10    |
| NYNRIN    | 0.761085904 | 3.487919408 | 7.159948682 | 4.80E-12    |
| RUNX1T1   | 0.761388789 | 1.59572048  | 7.496914253 | 5.43E-13    |
| PLPP1     | 0.761401922 | 5.397624167 | 8.842598802 | 4.70E-17    |
| NRXN2     | 0.761422928 | 1.286080372 | 7.075639154 | 8.19E-12    |
| TGFBI     | 0.761498491 | 6.257170959 | 6.078768454 | 3.17E-09    |
| TPPP3     | 0.76155992  | 4.842052514 | 4.490064609 | 9.69E-06    |
| IGHA2     | 0.761939596 | 7.477104025 | 2.67636596  | 0.007793354 |
| SNRPN     | 0.762061998 | 3.651340857 | 6.725124824 | 7.18E-11    |
| LAMP5     | 0.762953657 | 1.701404879 | 6.238250975 | 1.28E-09    |
| FGF2      | 0.762977072 | 1.482228375 | 7.470206569 | 6.47E-13    |
| LDB3      | 0.763005086 | 1.301666289 | 5.349568713 | 1.60E-07    |
| ACTA2-AS1 | 0.763040806 | 1.746805951 | 6.621956444 | 1.34E-10    |
| KLF15     | 0.763866265 | 1.652036126 | 6.445214604 | 3.84E-10    |
| DOK5      | 0.763926192 | 1.571680938 | 9.998860391 | 7.25E-21    |
| PRKG1     | 0.764004301 | 2.157237222 | 8.348280572 | 1.64E-15    |
| PSD       | 0.764664529 | 2.090084061 | 5.226916092 | 2.97E-07    |
| ASAP3     | 0.765465971 | 2.960405116 | 8.244383901 | 3.40E-15    |

|           |             |             |             |             |
|-----------|-------------|-------------|-------------|-------------|
| PID1      | 0.766529404 | 2.89241266  | 5.751179005 | 1.94E-08    |
| SFTA2     | 0.766843064 | 3.946426981 | 3.298533787 | 0.001071921 |
| SLC2A10   | 0.76684387  | 3.774407319 | 6.100505078 | 2.81E-09    |
| SCARA5    | 0.76702427  | 1.490358583 | 5.954549979 | 6.36E-09    |
| CHRNA3    | 0.768101798 | 1.241087759 | 5.321485878 | 1.84E-07    |
| COL4A2    | 0.768144359 | 7.484418455 | 7.320118053 | 1.72E-12    |
| PKIA      | 0.769258016 | 1.466472553 | 8.169401503 | 5.74E-15    |
| PRKAA2    | 0.769449909 | 1.138027254 | 6.778850392 | 5.17E-11    |
| MAPK8IP1  | 0.76970562  | 2.524628351 | 6.495530501 | 2.85E-10    |
| PALLD     | 0.770031791 | 6.042266592 | 6.032651374 | 4.11E-09    |
| SYT11     | 0.770064663 | 3.102392766 | 7.009114727 | 1.24E-11    |
| CHRM2     | 0.770348472 | 0.922369984 | 5.422009582 | 1.10E-07    |
| RBP7      | 0.770483922 | 2.187008836 | 7.989510594 | 1.99E-14    |
| WNT9A     | 0.772203619 | 1.545568884 | 6.724604646 | 7.20E-11    |
| EGR3      | 0.772548152 | 2.599295055 | 6.414536369 | 4.59E-10    |
| A4GALT    | 0.772909717 | 3.70579699  | 7.209260034 | 3.50E-12    |
| TSPY26P   | 0.773100932 | 1.843743725 | 8.13742672  | 7.17E-15    |
| CD93      | 0.773198304 | 4.61781765  | 7.693960426 | 1.47E-13    |
| MAGED1    | 0.773490813 | 5.696013294 | 7.886729624 | 4.01E-14    |
| LOX       | 0.773497156 | 3.897018987 | 6.671216401 | 9.95E-11    |
| CLIP4     | 0.7737502   | 2.733383561 | 7.292583549 | 2.05E-12    |
| MID2      | 0.773896768 | 2.459472552 | 7.739342629 | 1.09E-13    |
| PLPP7     | 0.773940284 | 1.493800609 | 9.544347278 | 2.46E-19    |
| SRPX2     | 0.774753498 | 3.292745281 | 7.281753258 | 2.20E-12    |
| TCEAL3    | 0.774757174 | 4.191165448 | 7.874822307 | 4.35E-14    |
| ANK2      | 0.775027966 | 1.405697811 | 7.048609252 | 9.71E-12    |
| GPX7      | 0.775127917 | 3.730846984 | 7.316632721 | 1.76E-12    |
| CYGB      | 0.775233041 | 4.917351012 | 8.734070025 | 1.04E-16    |
| FCER1A    | 0.775320996 | 1.367479277 | 6.253129442 | 1.17E-09    |
| CACNA1C   | 0.775896676 | 2.009079857 | 6.304362199 | 8.74E-10    |
| LAYN      | 0.777800054 | 2.50399021  | 7.558751167 | 3.62E-13    |
| GFRA3     | 0.778115719 | 1.440727807 | 5.814908763 | 1.37E-08    |
| SULT1C4   | 0.778348056 | 1.488800099 | 7.836032486 | 5.66E-14    |
| PHLDB1    | 0.778483081 | 4.169048735 | 8.55150822  | 3.86E-16    |
| PRSS23    | 0.778851231 | 5.006089767 | 7.710234796 | 1.32E-13    |
| NRSN2     | 0.779917891 | 4.584558723 | 7.153702385 | 4.99E-12    |
| MEG3      | 0.780261197 | 2.270719579 | 7.262262518 | 2.50E-12    |
| STOM      | 0.780906918 | 6.657936935 | 8.603455904 | 2.66E-16    |
| CLIC4     | 0.781567791 | 6.221005861 | 7.764045931 | 9.20E-14    |
| LMO3      | 0.782355036 | 1.527762375 | 7.185384453 | 4.08E-12    |
| PDGFD     | 0.782606794 | 2.645874497 | 8.03611125  | 1.44E-14    |
| IL6       | 0.782610596 | 2.57813122  | 4.754732621 | 2.91E-06    |
| NID2      | 0.783520413 | 3.823633081 | 7.218006995 | 3.31E-12    |
| ALPK3     | 0.784003155 | 2.005625025 | 6.865663495 | 3.03E-11    |
| G0S2      | 0.784512587 | 4.642233279 | 5.527949093 | 6.35E-08    |
| HAND2-AS1 | 0.784801889 | 1.13595697  | 5.159786119 | 4.15E-07    |
| ATP2B4    | 0.784988816 | 5.092269715 | 6.767419196 | 5.55E-11    |
| BNC2      | 0.786219063 | 1.503076073 | 7.883624746 | 4.10E-14    |
| NLGN2     | 0.7863046   | 3.45966421  | 7.665490338 | 1.78E-13    |
| PNMA8A    | 0.787553353 | 1.207226234 | 7.37411457  | 1.21E-12    |
| EBF4      | 0.78812219  | 2.993859681 | 6.770177367 | 5.46E-11    |
| KCNH2     | 0.788930938 | 2.75850119  | 4.726087804 | 3.32E-06    |
| LRRC17    | 0.788944714 | 1.774384938 | 8.272588844 | 2.79E-15    |

|            |             |             |             |             |
|------------|-------------|-------------|-------------|-------------|
| MARVELD1   | 0.789030211 | 5.124162525 | 7.834976378 | 5.70E-14    |
| DYNC1I1    | 0.789076858 | 1.427799088 | 7.813680195 | 6.58E-14    |
| KRT17      | 0.789387855 | 4.913859482 | 2.689395264 | 0.007501589 |
| GYPC       | 0.78944798  | 4.20248639  | 6.736793619 | 6.69E-11    |
| PER1       | 0.789460518 | 4.491836833 | 7.021518596 | 1.15E-11    |
| BST1       | 0.789703552 | 2.58942287  | 8.127428507 | 7.68E-15    |
| FMO2       | 0.790382372 | 2.022187552 | 5.578858016 | 4.86E-08    |
| RBMS1      | 0.790474428 | 4.714494944 | 8.850025833 | 4.45E-17    |
| CACNA2D1   | 0.790821206 | 2.314210647 | 6.653927419 | 1.10E-10    |
| CAND2      | 0.791375539 | 1.425228206 | 7.631364766 | 2.23E-13    |
| RTL5       | 0.791439252 | 1.619832811 | 8.712999061 | 1.21E-16    |
| PHYHD1     | 0.791980868 | 2.319470823 | 6.668137273 | 1.01E-10    |
| GC         | 0.792293157 | 1.465762006 | 3.877608921 | 0.00012603  |
| ZBTB16     | 0.792799934 | 1.251903673 | 6.701831169 | 8.27E-11    |
| GABARAPL1  | 0.793039184 | 4.305835321 | 9.127002124 | 5.75E-18    |
| GPR27      | 0.794215775 | 1.216309306 | 6.594997352 | 1.57E-10    |
| HOXA4      | 0.797420127 | 1.96272261  | 7.77339358  | 8.64E-14    |
| ADAMTSL3   | 0.797824147 | 1.36134832  | 7.968843591 | 2.29E-14    |
| VGLL1      | 0.798411124 | 1.447204497 | 4.349618791 | 1.79E-05    |
| ADAMTSL4   | 0.798823867 | 3.192509677 | 6.932172028 | 2.01E-11    |
| CTSE       | 0.798901109 | 7.282438751 | 2.617128237 | 0.009252716 |
| CDO1       | 0.798953342 | 1.126227036 | 8.433525098 | 8.96E-16    |
| SORBS2     | 0.799278634 | 3.3534836   | 6.069740469 | 3.34E-09    |
| SLC2A3     | 0.799626178 | 4.088182925 | 6.960374832 | 1.69E-11    |
| F2RL3      | 0.79974701  | 2.81939169  | 7.578012374 | 3.18E-13    |
| AP001189.3 | 0.799906303 | 1.482552118 | 9.575050247 | 1.94E-19    |
| SH3PXD2B   | 0.799983053 | 4.163914137 | 8.712239039 | 1.21E-16    |
| COL5A2     | 0.800243944 | 5.778481407 | 6.566250095 | 1.87E-10    |
| SHF        | 0.800917616 | 2.107874394 | 8.030251475 | 1.50E-14    |
| SCN4B      | 0.801235171 | 1.305319013 | 9.165070724 | 4.33E-18    |
| LPAR1      | 0.801556941 | 2.999755298 | 7.544181196 | 3.98E-13    |
| AADAC      | 0.801669714 | 2.650463595 | 4.202530031 | 3.36E-05    |
| LGI2       | 0.801862572 | 1.877004141 | 6.975735748 | 1.53E-11    |
| FAT4       | 0.802171049 | 1.707718874 | 8.779478295 | 7.44E-17    |
| ACTC1      | 0.802221108 | 1.564785862 | 6.672855314 | 9.86E-11    |
| MRAS       | 0.802390583 | 3.003237214 | 8.267671594 | 2.89E-15    |
| PLAT       | 0.803149593 | 5.243487836 | 9.202958346 | 3.26E-18    |
| PTN        | 0.80322722  | 3.049704674 | 6.342470534 | 7.00E-10    |
| TWIST1     | 0.804040103 | 2.270943708 | 6.916014035 | 2.22E-11    |
| FAM107A    | 0.804982222 | 2.121464079 | 6.906975051 | 2.35E-11    |
| CMTM3      | 0.805019754 | 4.472513472 | 8.169149227 | 5.75E-15    |
| FGF10      | 0.805611881 | 1.308886656 | 6.505088194 | 2.69E-10    |
| SH3RF3     | 0.805802522 | 2.510765107 | 9.099341583 | 7.06E-18    |
| ADRA2A     | 0.806022635 | 3.482584278 | 3.898206062 | 0.000116189 |
| ANTXR2     | 0.806907593 | 4.06273451  | 7.088589005 | 7.54E-12    |
| NEXN       | 0.806946251 | 3.984062266 | 5.216304152 | 3.13E-07    |
| CXCL12     | 0.8070091   | 4.182262968 | 5.837186238 | 1.21E-08    |
| GLIS3      | 0.807133053 | 2.514311368 | 7.215871617 | 3.36E-12    |
| FOXP2      | 0.807663214 | 1.379489498 | 6.881761667 | 2.75E-11    |
| HIC1       | 0.807729765 | 2.973505381 | 8.178300783 | 5.40E-15    |
| BVES       | 0.808571632 | 1.666326961 | 6.813865714 | 4.17E-11    |
| PLAGL1     | 0.808782074 | 2.793864884 | 7.914123755 | 3.33E-14    |
| DST        | 0.808863235 | 3.77641501  | 7.262867055 | 2.49E-12    |



|            |             |             |             |             |
|------------|-------------|-------------|-------------|-------------|
| VIP        | 0.80931957  | 1.218951316 | 4.936282175 | 1.24E-06    |
| ARHGAP23   | 0.809631802 | 4.237882    | 7.206213713 | 3.57E-12    |
| EPHA7      | 0.809631869 | 1.103674978 | 6.201438754 | 1.58E-09    |
| VWF        | 0.810498671 | 5.199213036 | 6.946515034 | 1.84E-11    |
| NPR1       | 0.810689453 | 2.095176507 | 9.086131784 | 7.79E-18    |
| CRMP1      | 0.810850047 | 2.72067001  | 8.47689923  | 6.58E-16    |
| BEX1       | 0.811138822 | 1.475729178 | 4.166401273 | 3.90E-05    |
| CCDC3      | 0.811390814 | 4.157552932 | 9.183213443 | 3.78E-18    |
| DLC1       | 0.811602972 | 3.483702684 | 8.514530202 | 5.03E-16    |
| DMD        | 0.811773371 | 1.938403825 | 6.748282453 | 6.24E-11    |
| THSD4      | 0.812084126 | 2.397483604 | 7.356671959 | 1.36E-12    |
| DNALI1     | 0.812638934 | 2.502800275 | 6.099083754 | 2.83E-09    |
| TNFAIP8L3  | 0.812739943 | 1.68420032  | 9.048131895 | 1.03E-17    |
| GRIK5      | 0.812813087 | 1.359597179 | 7.081695708 | 7.88E-12    |
| MAPK10     | 0.81294751  | 1.556241506 | 8.800168483 | 6.40E-17    |
| CSPG4      | 0.812951092 | 3.585686087 | 6.351115499 | 6.66E-10    |
| KLF9       | 0.813152919 | 4.429135023 | 7.509398046 | 5.01E-13    |
| DENND5A    | 0.813837379 | 3.986460003 | 8.911824956 | 2.83E-17    |
| ZSCAN18    | 0.814068868 | 2.003936459 | 7.666922816 | 1.76E-13    |
| WFDC1      | 0.814243476 | 2.611502416 | 7.562288807 | 3.53E-13    |
| SPON2      | 0.815404676 | 5.990749529 | 7.376345486 | 1.19E-12    |
| SYNPO      | 0.815701641 | 5.311453867 | 7.549100387 | 3.85E-13    |
| PDZD4      | 0.815773791 | 1.257007317 | 7.617147266 | 2.46E-13    |
| SYNDIG1    | 0.815978846 | 2.024670306 | 7.80523806  | 6.97E-14    |
| COL12A1    | 0.816100194 | 5.348234446 | 6.060256871 | 3.52E-09    |
| RHOJ       | 0.817018045 | 3.248157097 | 8.726992006 | 1.09E-16    |
| DNAJB5     | 0.818167159 | 2.46176498  | 6.679821763 | 9.45E-11    |
| TYRP1      | 0.81828681  | 1.498903665 | 6.645132405 | 1.17E-10    |
| ST6GALNAC5 | 0.818368409 | 1.944873436 | 8.14332687  | 6.88E-15    |
| CSDC2      | 0.818550109 | 1.377574939 | 9.559123066 | 2.19E-19    |
| SLC16A4    | 0.818691068 | 2.644312721 | 8.042428745 | 1.38E-14    |
| CLEC11A    | 0.818996164 | 3.991539144 | 7.291937092 | 2.06E-12    |
| RTL8C      | 0.819038488 | 6.802666069 | 9.647063078 | 1.12E-19    |
| NREP       | 0.819279184 | 4.617726932 | 8.669720834 | 1.65E-16    |
| PLOD2      | 0.819555567 | 4.786346455 | 8.569845942 | 3.39E-16    |
| TPSB2      | 0.82021221  | 3.890664539 | 4.844155365 | 1.91E-06    |
| RBMS3      | 0.821103194 | 1.949607455 | 8.724283712 | 1.11E-16    |
| CDKN1C     | 0.821350975 | 4.060408619 | 6.145368851 | 2.18E-09    |
| OLFML1     | 0.822535063 | 2.97187898  | 8.918919068 | 2.68E-17    |
| CACNG4     | 0.822983331 | 1.411058328 | 5.328482935 | 1.78E-07    |
| CNRIP1     | 0.824276801 | 3.124330994 | 9.488676806 | 3.76E-19    |
| THNSL2     | 0.82452862  | 2.454506229 | 6.239655472 | 1.27E-09    |
| WLS        | 0.825230106 | 5.506044485 | 8.097175205 | 9.48E-15    |
| APOA4      | 0.825623682 | 1.304599814 | 3.697556305 | 0.000252697 |
| EGR1       | 0.825680663 | 6.743631375 | 5.96401785  | 6.03E-09    |
| SYNGR1     | 0.825999991 | 2.267251489 | 6.635899391 | 1.23E-10    |
| P3H3       | 0.826138072 | 3.422743242 | 7.870625859 | 4.48E-14    |
| PDPN       | 0.826140071 | 4.263768576 | 7.677808089 | 1.64E-13    |
| CD248      | 0.826252767 | 5.028713979 | 7.651871079 | 1.95E-13    |
| ATP1B2     | 0.826358373 | 1.583613597 | 8.633299465 | 2.15E-16    |
| DIO2       | 0.82737972  | 3.663836065 | 7.157371938 | 4.88E-12    |
| CLEC3B     | 0.827822639 | 2.834129474 | 7.167406444 | 4.58E-12    |
| CGNL1      | 0.827964314 | 2.023866535 | 7.390009495 | 1.09E-12    |

|            |             |             |             |             |
|------------|-------------|-------------|-------------|-------------|
| NOTCH3     | 0.828189992 | 5.650275961 | 7.941133796 | 2.77E-14    |
| GHR        | 0.828600232 | 1.288969468 | 9.10678754  | 6.68E-18    |
| SEMA6A     | 0.82869372  | 3.108793279 | 5.888726346 | 9.15E-09    |
| LDB2       | 0.829030795 | 3.134325203 | 10.2761471  | 8.09E-22    |
| ZFPM2      | 0.829041626 | 1.614376203 | 9.150175142 | 4.83E-18    |
| SORCS2     | 0.829174573 | 1.361537269 | 9.562151468 | 2.14E-19    |
| ARL4D      | 0.829184595 | 2.013821819 | 6.788442806 | 4.88E-11    |
| EEF1A2     | 0.829269771 | 2.092542697 | 3.642144623 | 0.000311329 |
| LINC02532  | 0.829413197 | 1.684311488 | 4.844074321 | 1.92E-06    |
| SLC15A1    | 0.829533674 | 1.627578519 | 4.910545814 | 1.40E-06    |
| SERTAD4    | 0.829694453 | 2.181194506 | 6.848454868 | 3.37E-11    |
| PDE9A      | 0.829778244 | 2.079153537 | 7.319416333 | 1.73E-12    |
| MEIS3      | 0.829810913 | 2.87188451  | 8.793768255 | 6.71E-17    |
| RASD2      | 0.82985975  | 2.298001863 | 8.570213904 | 3.38E-16    |
| CAVIN3     | 0.830194815 | 5.970276672 | 8.188429793 | 5.03E-15    |
| CDC42EP3   | 0.8307087   | 3.8091811   | 7.520638596 | 4.65E-13    |
| REEP2      | 0.831587857 | 1.855266396 | 6.654068647 | 1.10E-10    |
| RAB3IL1    | 0.832236582 | 3.383677417 | 8.545997775 | 4.02E-16    |
| FNDC4      | 0.832462626 | 2.707304486 | 8.774332655 | 7.73E-17    |
| IGFBP3     | 0.832479917 | 7.347734881 | 6.973581319 | 1.55E-11    |
| GPBAR1     | 0.833202361 | 2.365296493 | 7.191217005 | 3.93E-12    |
| TGFB3      | 0.833366496 | 3.321922729 | 7.006444957 | 1.26E-11    |
| UPK1B      | 0.833537669 | 1.437540515 | 4.367083524 | 1.66E-05    |
| TSC22D3    | 0.834234512 | 5.964715277 | 7.115991022 | 6.34E-12    |
| ITGA5      | 0.834277539 | 5.67767904  | 7.267075413 | 2.42E-12    |
| NR4A1      | 0.834506523 | 5.251510238 | 5.831704958 | 1.25E-08    |
| GAS7       | 0.834924182 | 3.185772368 | 7.215990058 | 3.36E-12    |
| COL4A5     | 0.835584057 | 2.346968624 | 6.255050336 | 1.16E-09    |
| LINC02381  | 0.836499776 | 4.115474117 | 4.589698903 | 6.20E-06    |
| RECK       | 0.837441604 | 2.26640515  | 9.949667748 | 1.07E-20    |
| BHMT2      | 0.837700461 | 1.477542537 | 8.251594184 | 3.23E-15    |
| GLI1       | 0.837773304 | 1.777518467 | 8.490077985 | 5.99E-16    |
| SMOC1      | 0.838434103 | 1.939237672 | 4.756228339 | 2.89E-06    |
| ANKRD65    | 0.839271655 | 2.107237885 | 7.404280789 | 9.96E-13    |
| APOB       | 0.840511274 | 1.020885681 | 4.88183995  | 1.60E-06    |
| MMRN1      | 0.840599663 | 1.614628151 | 7.346342702 | 1.45E-12    |
| HEG1       | 0.84075444  | 4.248286951 | 8.402829519 | 1.11E-15    |
| TCF7L1     | 0.841020576 | 3.182596729 | 8.40839287  | 1.07E-15    |
| RAB31      | 0.841350222 | 5.130097702 | 7.825187487 | 6.09E-14    |
| TTC28      | 0.842056793 | 2.443609816 | 9.596370373 | 1.65E-19    |
| PMP22      | 0.842626294 | 6.059694276 | 8.301763275 | 2.27E-15    |
| MEOX2      | 0.842762224 | 1.382154233 | 7.083968085 | 7.77E-12    |
| CPNE8      | 0.843411199 | 2.36796619  | 10.1457385  | 2.28E-21    |
| NID1       | 0.84382359  | 5.809840366 | 8.46133956  | 7.36E-16    |
| AC015922.3 | 0.844191097 | 3.086366113 | 7.698244525 | 1.43E-13    |
| NRP1       | 0.844400747 | 4.77722118  | 9.872307213 | 1.95E-20    |
| PRKD1      | 0.845428194 | 1.705419041 | 10.50452799 | 1.30E-22    |
| FOLR2      | 0.84565555  | 3.582949892 | 5.808348466 | 1.42E-08    |
| SMARCD3    | 0.845838348 | 3.180036207 | 9.1931453   | 3.51E-18    |
| C4B        | 0.846501151 | 2.537139014 | 6.722631728 | 7.29E-11    |
| S1PR1      | 0.847226177 | 4.274004854 | 8.081332825 | 1.06E-14    |
| NTN4       | 0.847583146 | 3.921193307 | 8.535806574 | 4.32E-16    |
| RCN3       | 0.847896034 | 5.283198974 | 7.870215548 | 4.49E-14    |

|            |             |             |             |          |
|------------|-------------|-------------|-------------|----------|
| RARRES2    | 0.84791595  | 5.354023083 | 7.955812519 | 2.51E-14 |
| INHBA      | 0.848453289 | 4.129517301 | 6.278828627 | 1.01E-09 |
| COL16A1    | 0.848704108 | 4.085218475 | 7.485455243 | 5.86E-13 |
| TSHZ3      | 0.84924096  | 2.43054332  | 8.653885105 | 1.85E-16 |
| FAM110B    | 0.849453646 | 1.783069639 | 9.010236152 | 1.37E-17 |
| HTRA3      | 0.849850817 | 5.334290751 | 6.193629916 | 1.65E-09 |
| GASK1A     | 0.851167965 | 1.383550872 | 8.635871373 | 2.11E-16 |
| DTNA       | 0.851423304 | 1.509724012 | 7.447646587 | 7.50E-13 |
| MMRN2      | 0.852247868 | 3.781587517 | 9.291433126 | 1.68E-18 |
| KCNJ8      | 0.852248901 | 2.861210038 | 8.818337923 | 5.61E-17 |
| PCDHB5     | 0.852356465 | 1.149818435 | 8.257338286 | 3.11E-15 |
| SCG5       | 0.85378574  | 2.59336966  | 8.450135798 | 7.97E-16 |
| MAMDC2     | 0.853872231 | 1.44456942  | 6.395228917 | 5.14E-10 |
| PRICKLE2   | 0.854549521 | 2.044180566 | 7.828790916 | 5.94E-14 |
| PCOLCE     | 0.855204754 | 5.887806547 | 7.336948946 | 1.54E-12 |
| MYOC       | 0.855498021 | 0.97976891  | 5.802359145 | 1.47E-08 |
| EPHA3      | 0.855987904 | 2.158224415 | 6.664657247 | 1.04E-10 |
| PDLIM7     | 0.856219257 | 6.575982384 | 7.921077165 | 3.18E-14 |
| GALNT15    | 0.856219639 | 1.388921516 | 9.392189184 | 7.83E-19 |
| SPART      | 0.85630669  | 3.110540311 | 7.99558009  | 1.91E-14 |
| RGS4       | 0.85655369  | 1.99297759  | 7.207750158 | 3.54E-12 |
| LSAMP      | 0.857287882 | 1.953611427 | 8.528458228 | 4.56E-16 |
| PPP1R1A    | 0.857995966 | 1.266525261 | 6.244141064 | 1.24E-09 |
| TFPI       | 0.858349593 | 3.651546761 | 8.043373228 | 1.37E-14 |
| PTPRM      | 0.858404515 | 3.622149463 | 9.235854991 | 2.55E-18 |
| LBH        | 0.858925733 | 5.305962947 | 8.917314902 | 2.71E-17 |
| S1PR3      | 0.859595687 | 2.903395538 | 7.609303993 | 2.59E-13 |
| FILIP1L    | 0.859601368 | 5.31369653  | 7.695084477 | 1.46E-13 |
| FAXDC2     | 0.860439315 | 2.930876943 | 7.072821556 | 8.33E-12 |
| MAP6       | 0.860686804 | 1.47732905  | 8.758168798 | 8.69E-17 |
| MAGEH1     | 0.861088095 | 3.537680465 | 9.538795275 | 2.56E-19 |
| PDE2A      | 0.861988512 | 2.150543933 | 8.793508875 | 6.72E-17 |
| LINC01436  | 0.862198409 | 1.409524333 | 6.953500535 | 1.76E-11 |
| MMP11      | 0.862801967 | 4.857653806 | 4.596592003 | 6.01E-06 |
| ZNF423     | 0.863939115 | 1.812703386 | 8.930245324 | 2.47E-17 |
| CARMN      | 0.86434245  | 1.610402743 | 6.453886211 | 3.64E-10 |
| PLTP       | 0.86439273  | 6.342558959 | 7.178686734 | 4.26E-12 |
| SMAD9      | 0.865341256 | 2.168925382 | 6.705163399 | 8.10E-11 |
| AP000892.4 | 0.865759668 | 1.768032254 | 6.676393633 | 9.65E-11 |
| NRXN3      | 0.865840316 | 1.462833344 | 6.61364821  | 1.41E-10 |
| MCAM       | 0.866659538 | 5.697568545 | 7.980862765 | 2.11E-14 |
| SCRN1      | 0.866698875 | 4.713419848 | 7.100800268 | 6.98E-12 |
| SHISA2     | 0.86734346  | 2.025766167 | 7.303238267 | 1.92E-12 |
| STEAP4     | 0.867493018 | 2.011038527 | 7.358296947 | 1.34E-12 |
| CPXM1      | 0.867526426 | 3.591269144 | 6.550930553 | 2.05E-10 |
| C1QTNF7    | 0.867728192 | 1.213581334 | 8.613985146 | 2.47E-16 |
| HSPA2      | 0.86795495  | 2.51605581  | 8.188004433 | 5.04E-15 |
| ZNF521     | 0.868048139 | 2.247667671 | 9.948608041 | 1.07E-20 |
| ITGA9      | 0.868593018 | 2.706289044 | 7.418260927 | 9.09E-13 |
| SETBP1     | 0.870020146 | 1.990801874 | 8.042191719 | 1.39E-14 |
| NRP2       | 0.870030754 | 4.091812655 | 7.069732292 | 8.50E-12 |
| OSMR       | 0.870131252 | 4.897089106 | 7.855233218 | 4.97E-14 |
| LOXL1      | 0.870806105 | 4.792208581 | 8.286064981 | 2.54E-15 |

|          |             |             |             |          |
|----------|-------------|-------------|-------------|----------|
| LAMA4    | 0.870862321 | 4.942437278 | 8.937607358 | 2.34E-17 |
| MRC2     | 0.871784805 | 4.731954403 | 7.473528718 | 6.33E-13 |
| NIBAN1   | 0.872562784 | 3.989879858 | 5.853232738 | 1.11E-08 |
| FOXF2    | 0.872962778 | 3.816815152 | 6.721138355 | 7.36E-11 |
| RBPMS    | 0.873866018 | 5.754907649 | 8.399238495 | 1.14E-15 |
| SNAP25   | 0.875128541 | 1.348941262 | 6.213487703 | 1.47E-09 |
| CHRD     | 0.875225127 | 1.995879335 | 9.133431511 | 5.48E-18 |
| DCHS1    | 0.87530194  | 3.185351085 | 8.757691787 | 8.72E-17 |
| PAPLN    | 0.875554206 | 2.745663574 | 7.750415691 | 1.01E-13 |
| NR0B2    | 0.875659226 | 3.59125081  | 4.541649229 | 7.70E-06 |
| NXN      | 0.876647419 | 4.383967895 | 7.493383258 | 5.56E-13 |
| PARM1    | 0.876791593 | 3.723652886 | 6.481988825 | 3.09E-10 |
| KIT      | 0.877312751 | 2.33140474  | 7.473485061 | 6.34E-13 |
| PPP1R12B | 0.87732313  | 3.999563117 | 5.287478835 | 2.19E-07 |
| TCEAL7   | 0.877549476 | 1.751915    | 9.739982964 | 5.45E-20 |
| CAP2     | 0.878764281 | 2.749474459 | 7.047634317 | 9.77E-12 |
| FABP3    | 0.879469862 | 4.076774583 | 6.829753939 | 3.79E-11 |
| LYNX1    | 0.87966179  | 2.381333823 | 5.333692359 | 1.73E-07 |
| COL1A1   | 0.880676233 | 9.794186941 | 5.618744045 | 3.94E-08 |
| GAMT     | 0.88109095  | 2.933872252 | 6.342018065 | 7.02E-10 |
| LOXL4    | 0.881842227 | 1.598245704 | 7.926765596 | 3.06E-14 |
| TSPYL5   | 0.882199484 | 2.357096644 | 6.625000965 | 1.32E-10 |
| ITGA11   | 0.8825801   | 3.008706731 | 7.141789809 | 5.39E-12 |
| KANK2    | 0.882663395 | 5.014238505 | 7.848852081 | 5.19E-14 |
| KCNK3    | 0.882840756 | 1.197710752 | 7.703056668 | 1.39E-13 |
| NTM      | 0.88318122  | 2.293348832 | 7.83343155  | 5.76E-14 |
| KCNS3    | 0.883263064 | 3.045027424 | 8.046260799 | 1.35E-14 |
| PRRX1    | 0.883580244 | 3.685587429 | 6.21797453  | 1.44E-09 |
| ALDH1A3  | 0.884138461 | 3.283905911 | 7.581055161 | 3.12E-13 |
| FRMD6    | 0.884962332 | 3.171262395 | 8.147006578 | 6.71E-15 |
| SALL2    | 0.88811227  | 1.500055672 | 8.502810407 | 5.47E-16 |
| LAMC1    | 0.888330501 | 5.989026766 | 9.320080353 | 1.35E-18 |
| CLDN5    | 0.888424037 | 3.50895092  | 7.58318062  | 3.08E-13 |
| GNAI1    | 0.889232125 | 3.302906861 | 8.986197591 | 1.63E-17 |
| TMEM100  | 0.889257057 | 1.518995358 | 6.999296789 | 1.32E-11 |
| DKK3     | 0.889412585 | 5.778669559 | 8.738314809 | 1.00E-16 |
| ACKR3    | 0.890357769 | 4.121285234 | 9.893313572 | 1.66E-20 |
| ETNK2    | 0.890616401 | 2.027170068 | 7.256952808 | 2.58E-12 |
| SYNC     | 0.891040089 | 1.648458753 | 7.448621472 | 7.46E-13 |
| GALNT16  | 0.891401608 | 1.197108116 | 9.046620508 | 1.04E-17 |
| C3orf70  | 0.891963473 | 2.169145652 | 6.892674589 | 2.57E-11 |
| NFATC4   | 0.89533211  | 2.45640104  | 9.97427501  | 8.79E-21 |
| HMCN1    | 0.895469417 | 1.558746105 | 9.280670883 | 1.82E-18 |
| GPX8     | 0.896397881 | 3.605101622 | 9.377753243 | 8.73E-19 |
| L1CAM    | 0.896407221 | 2.306854219 | 4.871612712 | 1.68E-06 |
| C4A      | 0.897449899 | 2.567973888 | 7.215049291 | 3.38E-12 |
| CXCR4    | 0.897936618 | 6.034520818 | 7.256818385 | 2.58E-12 |
| HIF3A    | 0.897953288 | 1.874450811 | 5.551651915 | 5.61E-08 |
| FOLR1    | 0.898458129 | 2.501710185 | 4.04179307  | 6.53E-05 |
| NFASC    | 0.898604877 | 2.230557162 | 6.657533773 | 1.08E-10 |
| PDE1A    | 0.899160478 | 1.860715721 | 10.40461781 | 2.90E-22 |
| FIBIN    | 0.899447974 | 2.851348536 | 7.783945633 | 8.05E-14 |
| ARMCX1   | 0.900539532 | 2.639640145 | 9.354090903 | 1.04E-18 |

|            |             |             |             |             |
|------------|-------------|-------------|-------------|-------------|
| LRP1       | 0.900602761 | 5.908559504 | 8.695487205 | 1.37E-16    |
| TUBA1A     | 0.901408    | 6.584563758 | 7.593739187 | 2.87E-13    |
| PNCK       | 0.901650713 | 1.466270881 | 5.948461007 | 6.57E-09    |
| GASK1B     | 0.901709749 | 4.635375879 | 8.789634044 | 6.91E-17    |
| FADS2      | 0.902080475 | 3.991400744 | 6.859586877 | 3.15E-11    |
| SYDE1      | 0.902388182 | 3.472818453 | 9.993387765 | 7.56E-21    |
| RGS2       | 0.902607774 | 5.62157997  | 7.551634267 | 3.79E-13    |
| HSPG2      | 0.903222539 | 6.519620722 | 7.4966062   | 5.44E-13    |
| AKT3       | 0.905864096 | 3.060422662 | 8.593165976 | 2.87E-16    |
| FBXL7      | 0.906452974 | 2.634183118 | 9.649610842 | 1.09E-19    |
| CLIC6      | 0.907505698 | 2.941234182 | 5.193309879 | 3.52E-07    |
| EPHX3      | 0.907771747 | 2.213542528 | 5.240399042 | 2.78E-07    |
| ZEB1       | 0.908737744 | 3.882383908 | 8.125244179 | 7.80E-15    |
| PROS1      | 0.908889849 | 3.775531652 | 7.959420297 | 2.44E-14    |
| THBD       | 0.910937687 | 4.189698846 | 9.215621604 | 2.96E-18    |
| CRABP1     | 0.911514114 | 1.644175738 | 4.503766161 | 9.11E-06    |
| LTF        | 0.912286966 | 3.721826236 | 3.289261472 | 0.001106758 |
| ITGA8      | 0.912301651 | 2.219060505 | 7.174624738 | 4.37E-12    |
| PCDH7      | 0.912434817 | 3.623831161 | 5.823502683 | 1.31E-08    |
| LINC00578  | 0.912810058 | 2.104636825 | 7.084111131 | 7.76E-12    |
| SMARCA1    | 0.913603236 | 3.460105265 | 8.246128922 | 3.36E-15    |
| PROC       | 0.91362275  | 2.027815292 | 6.998257774 | 1.33E-11    |
| SVIL       | 0.915512432 | 4.784644117 | 6.927998796 | 2.06E-11    |
| FEZ1       | 0.915646175 | 3.01667729  | 9.577012402 | 1.91E-19    |
| VSTM4      | 0.917351077 | 2.302493278 | 9.060420669 | 9.43E-18    |
| NR4A3      | 0.918334883 | 2.387245756 | 7.686728203 | 1.55E-13    |
| ATP1A2     | 0.919551386 | 1.241729207 | 6.23055301  | 1.34E-09    |
| GPC6       | 0.920502456 | 2.87151001  | 8.248378773 | 3.31E-15    |
| COL6A2     | 0.920584801 | 8.205715124 | 7.567058395 | 3.42E-13    |
| THY1       | 0.920980428 | 5.914188027 | 8.092685633 | 9.78E-15    |
| TPST1      | 0.922034152 | 3.559196371 | 9.975060323 | 8.73E-21    |
| TSPAN18    | 0.922160905 | 3.951454008 | 7.324740582 | 1.67E-12    |
| FAM20C     | 0.922219649 | 5.228426346 | 8.500532648 | 5.56E-16    |
| MFGE8      | 0.922791472 | 6.434078342 | 10.5617339  | 8.19E-23    |
| SHISA3     | 0.923017417 | 1.62059912  | 6.214510601 | 1.47E-09    |
| JAM2       | 0.923327897 | 2.665233395 | 7.996808533 | 1.89E-14    |
| PTGS2      | 0.924226276 | 3.126512744 | 5.806602713 | 1.43E-08    |
| TMEM200B   | 0.924408612 | 1.846730128 | 10.88271758 | 6.01E-24    |
| CAV1       | 0.924515229 | 5.351102093 | 7.382367077 | 1.15E-12    |
| SERPINE2   | 0.925342321 | 3.525156281 | 7.23165078  | 3.04E-12    |
| RAMP1      | 0.926357875 | 5.229818657 | 5.492752611 | 7.63E-08    |
| SERPING1   | 0.926973132 | 7.752067411 | 7.129458496 | 5.83E-12    |
| SCRG1      | 0.92705816  | 1.249479099 | 6.554463698 | 2.01E-10    |
| SELENOM    | 0.927411312 | 5.784696777 | 8.215209848 | 4.17E-15    |
| TFF1       | 0.928319158 | 8.171654887 | 2.814836705 | 0.005156857 |
| ATP8B2     | 0.928795321 | 3.334678568 | 8.457998671 | 7.53E-16    |
| DAAM2      | 0.928914161 | 2.737672325 | 7.683087832 | 1.58E-13    |
| RGS5       | 0.930764123 | 6.33651257  | 7.834844141 | 5.71E-14    |
| CNTN1      | 0.931276467 | 1.28858128  | 7.468691026 | 6.54E-13    |
| GLT8D2     | 0.932162106 | 3.412441855 | 9.243678237 | 2.40E-18    |
| LHFPL3-AS2 | 0.932864363 | 1.974685637 | 5.61469834  | 4.02E-08    |
| SPARC      | 0.932944241 | 8.789140904 | 8.137963687 | 7.14E-15    |
| EFHD1      | 0.933198741 | 2.726037502 | 9.238184884 | 2.50E-18    |

|         |             |             |             |             |
|---------|-------------|-------------|-------------|-------------|
| MPDZ    | 0.934569134 | 2.193353733 | 9.121796236 | 5.97E-18    |
| ZNF853  | 0.935002139 | 2.16537138  | 8.127124078 | 7.70E-15    |
| SST     | 0.936360213 | 2.036846122 | 3.916584943 | 0.000108027 |
| TACR2   | 0.936597245 | 2.411695885 | 4.320481178 | 2.03E-05    |
| MAP1A   | 0.936755651 | 2.612564821 | 8.297199663 | 2.35E-15    |
| TM4SF4  | 0.936916768 | 3.114389185 | 3.702508661 | 0.000247997 |
| FAP     | 0.937220721 | 3.213650048 | 6.96685635  | 1.62E-11    |
| KRT7    | 0.937803026 | 5.962383296 | 3.456756061 | 0.000614158 |
| MAN1C1  | 0.937914694 | 2.994112311 | 9.530077689 | 2.74E-19    |
| IGFBP7  | 0.938201581 | 9.239714886 | 9.384956489 | 8.27E-19    |
| SCG2    | 0.939021459 | 1.591176611 | 7.248358449 | 2.73E-12    |
| SPEG    | 0.939183931 | 1.863117725 | 6.318980396 | 8.03E-10    |
| METTL24 | 0.940109676 | 1.535139799 | 7.10708956  | 6.71E-12    |
| COL5A1  | 0.94083144  | 6.254064853 | 7.145558584 | 5.26E-12    |
| MXRA7   | 0.941147324 | 4.569090512 | 8.479424013 | 6.47E-16    |
| MYOCD   | 0.941189626 | 1.702006858 | 6.56143684  | 1.92E-10    |
| TNS2    | 0.941757976 | 4.83645105  | 9.624782192 | 1.33E-19    |
| PCDHGC3 | 0.942907235 | 2.964398922 | 8.64525575  | 1.97E-16    |
| TUBB6   | 0.943341361 | 5.316821039 | 8.856804593 | 4.23E-17    |
| LTBP3   | 0.944422859 | 5.716205827 | 8.854345215 | 4.31E-17    |
| DACT1   | 0.944988021 | 3.127454291 | 8.078188158 | 1.08E-14    |
| EFS     | 0.945493496 | 2.104735256 | 9.960275583 | 9.81E-21    |
| TSPAN2  | 0.946135914 | 2.879921885 | 6.964287255 | 1.65E-11    |
| PDLIM4  | 0.946680634 | 3.905989059 | 7.978560003 | 2.14E-14    |
| SIX2    | 0.948158822 | 2.313047213 | 5.01216624  | 8.57E-07    |
| CTSK    | 0.948177925 | 6.152347361 | 8.400274035 | 1.13E-15    |
| F10     | 0.948363182 | 2.483236614 | 6.283269549 | 9.87E-10    |
| CHST3   | 0.948769962 | 2.714959976 | 8.816080497 | 5.70E-17    |
| GUCY1B1 | 0.950127242 | 3.878418591 | 8.79449694  | 6.67E-17    |
| SSPN    | 0.950511273 | 3.432152316 | 7.941675293 | 2.76E-14    |
| C1R     | 0.950576843 | 6.594610471 | 7.91729091  | 3.26E-14    |
| RASL12  | 0.950848083 | 3.123229387 | 9.868477618 | 2.01E-20    |
| CAV2    | 0.951014853 | 4.81740326  | 8.127633075 | 7.67E-15    |
| SMIM24  | 0.951099258 | 5.853839474 | 4.356658801 | 1.74E-05    |
| AXL     | 0.951198936 | 4.622861126 | 8.951791954 | 2.11E-17    |
| EDNRA   | 0.952175114 | 3.384892488 | 9.11963154  | 6.07E-18    |
| ADGRL2  | 0.952310619 | 3.518891552 | 9.490435822 | 3.71E-19    |
| PRIMA1  | 0.952357169 | 1.622641508 | 6.251646937 | 1.18E-09    |
| RNF150  | 0.953367338 | 1.730041862 | 7.75623349  | 9.70E-14    |
| SDC2    | 0.954055435 | 4.604539514 | 10.15218557 | 2.16E-21    |
| OLFML2B | 0.954222658 | 4.514925902 | 6.891245589 | 2.59E-11    |
| CCN2    | 0.955097589 | 7.302180429 | 8.095495778 | 9.59E-15    |
| BCAM    | 0.955164513 | 5.501900114 | 7.246848592 | 2.76E-12    |
| SGCD    | 0.955452427 | 2.120381096 | 8.467249227 | 7.05E-16    |
| DPT     | 0.956610061 | 2.597775774 | 5.869075148 | 1.02E-08    |
| LARP6   | 0.957451933 | 2.000331293 | 10.18922737 | 1.61E-21    |
| PDGFRB  | 0.957452796 | 5.868292145 | 8.482220104 | 6.34E-16    |
| CERCAM  | 0.957491101 | 4.080055131 | 8.366193951 | 1.44E-15    |
| COL6A3  | 0.95795085  | 6.846166773 | 7.212144671 | 3.44E-12    |
| IL33    | 0.960339122 | 3.571872467 | 5.80495694  | 1.45E-08    |
| COLEC12 | 0.960496298 | 2.062846171 | 8.663672327 | 1.72E-16    |
| NPW     | 0.960781722 | 2.889051386 | 4.857446832 | 1.80E-06    |
| PFN2    | 0.96094868  | 5.04681165  | 6.529122231 | 2.33E-10    |

|            |             |             |             |             |
|------------|-------------|-------------|-------------|-------------|
| TUSC3      | 0.961134067 | 2.650115111 | 9.018578221 | 1.29E-17    |
| SHISA4     | 0.961148684 | 3.585687858 | 9.100533525 | 7.00E-18    |
| CRLF1      | 0.961647402 | 1.758873327 | 7.722001828 | 1.22E-13    |
| QPRT       | 0.96193816  | 3.428179511 | 5.111422882 | 5.28E-07    |
| AC104083.1 | 0.962373128 | 3.547094161 | 7.572684639 | 3.30E-13    |
| AMIGO2     | 0.963460759 | 3.206771715 | 8.073076137 | 1.12E-14    |
| STC1       | 0.963687498 | 4.307007011 | 9.099058908 | 7.08E-18    |
| VASN       | 0.963880848 | 4.141726997 | 10.36670906 | 3.93E-22    |
| PTGER3     | 0.964242664 | 1.529200591 | 9.87379556  | 1.93E-20    |
| PRSS2      | 0.964456658 | 3.80242508  | 2.985051757 | 0.003035145 |
| BMERB1     | 0.965030464 | 3.469907308 | 9.03088177  | 1.17E-17    |
| LINC00261  | 0.966219184 | 2.216744975 | 5.065479208 | 6.61E-07    |
| CCL19      | 0.966960452 | 3.760788502 | 4.191032512 | 3.52E-05    |
| WASF3      | 0.968701954 | 1.834148428 | 8.36603048  | 1.45E-15    |
| GJA1       | 0.969529571 | 4.906928098 | 8.980819127 | 1.70E-17    |
| TNC        | 0.969863252 | 5.131638422 | 5.545346334 | 5.80E-08    |
| SVEP1      | 0.970041125 | 1.918502846 | 8.519822502 | 4.85E-16    |
| F5         | 0.970089    | 3.114054275 | 5.329047663 | 1.77E-07    |
| ARHGEF17   | 0.970837188 | 3.875612017 | 10.66175242 | 3.64E-23    |
| ANGPTL2    | 0.971296008 | 5.219647542 | 7.662659265 | 1.81E-13    |
| HOPX       | 0.972272956 | 3.69581099  | 6.814222134 | 4.17E-11    |
| AMOTL1     | 0.972343761 | 3.516693826 | 8.390016984 | 1.22E-15    |
| IL1R1      | 0.972559574 | 4.888118598 | 10.07634642 | 3.94E-21    |
| KCNE4      | 0.972938922 | 2.494641811 | 8.925934864 | 2.55E-17    |
| PTGDS      | 0.973238523 | 5.679899229 | 5.197013043 | 3.45E-07    |
| SMIM10     | 0.973318111 | 2.37588293  | 10.36297826 | 4.05E-22    |
| TMTC1      | 0.97364846  | 2.347056619 | 8.405919827 | 1.09E-15    |
| MYH10      | 0.975483368 | 3.69152503  | 8.51603143  | 4.98E-16    |
| ZNF667-AS1 | 0.975826307 | 2.439285214 | 8.958896792 | 2.00E-17    |
| COL1A2     | 0.976315865 | 8.986731325 | 6.796244122 | 4.65E-11    |
| CASQ2      | 0.976454231 | 1.419426538 | 6.39094754  | 5.28E-10    |
| ANGPTL1    | 0.97707595  | 1.65995319  | 6.229799897 | 1.34E-09    |
| SHC2       | 0.97870959  | 3.518967792 | 8.805015087 | 6.18E-17    |
| LRRN4CL    | 0.980116809 | 1.82046225  | 10.23441595 | 1.13E-21    |
| GGT5       | 0.980222661 | 4.279175    | 8.744072113 | 9.63E-17    |
| RTL8B      | 0.980442115 | 3.31170441  | 10.50605796 | 1.28E-22    |
| KIRREL1    | 0.980484522 | 3.758421694 | 10.42747046 | 2.41E-22    |
| PLXDC2     | 0.981774072 | 3.453166242 | 8.29190639  | 2.44E-15    |
| SELP       | 0.983879031 | 2.502869851 | 7.247840611 | 2.74E-12    |
| ST3GAL4    | 0.984368322 | 4.116381502 | 8.521000473 | 4.81E-16    |
| ABCA8      | 0.984627542 | 1.663361789 | 7.340335547 | 1.51E-12    |
| C8orf88    | 0.984685096 | 1.529356271 | 7.706589825 | 1.35E-13    |
| FAM180A    | 0.985872462 | 1.473920988 | 9.611364458 | 1.47E-19    |
| ZNF880     | 0.985977952 | 2.324483281 | 9.023793213 | 1.24E-17    |
| MATN2      | 0.986828382 | 4.008957298 | 6.3663267   | 6.09E-10    |
| CLDN11     | 0.987912723 | 1.934530103 | 8.517847554 | 4.92E-16    |
| SLCO2A1    | 0.988497818 | 4.541323893 | 8.28103387  | 2.63E-15    |
| NGFR       | 0.988680067 | 1.891073257 | 5.809840141 | 1.41E-08    |
| RRAD       | 0.989039706 | 2.947663945 | 6.998685536 | 1.33E-11    |
| FBXO32     | 0.989320454 | 4.207071908 | 7.572238253 | 3.31E-13    |
| HPN        | 0.990353512 | 1.823265884 | 5.228464785 | 2.95E-07    |
| SAMD11     | 0.991704078 | 2.129608088 | 10.12087256 | 2.77E-21    |
| PDGFRA     | 0.992418531 | 4.077719504 | 8.562409343 | 3.57E-16    |

|            |             |             |             |          |
|------------|-------------|-------------|-------------|----------|
| CLMP       | 0.992815657 | 2.92729475  | 7.257843389 | 2.57E-12 |
| SLC16A2    | 0.993300504 | 3.203402325 | 7.70970075  | 1.32E-13 |
| FSTL3      | 0.993683358 | 4.576549803 | 7.511212893 | 4.95E-13 |
| GFPT2      | 0.994998308 | 2.70704427  | 8.374078671 | 1.37E-15 |
| CILP       | 0.995104734 | 1.827475039 | 6.119550858 | 2.52E-09 |
| EVC        | 0.998527162 | 2.605979588 | 9.0599647   | 9.46E-18 |
| ADAMTS8    | 0.998833963 | 1.567575813 | 7.805219748 | 6.97E-14 |
| AOX1       | 1.001368376 | 1.391429171 | 9.498371845 | 3.49E-19 |
| CNTNAP1    | 1.001559674 | 2.824475977 | 9.566554584 | 2.07E-19 |
| CTF1       | 1.001969433 | 2.754748844 | 7.563065494 | 3.51E-13 |
| COL8A2     | 1.002343345 | 2.609423964 | 8.992422021 | 1.56E-17 |
| FKBP10     | 1.003296085 | 5.78291969  | 6.787996155 | 4.89E-11 |
| LIMS2      | 1.003425722 | 3.396970704 | 7.440187599 | 7.88E-13 |
| BEX4       | 1.00416172  | 3.823437413 | 8.591506314 | 2.90E-16 |
| LHFPL6     | 1.005058854 | 4.616332831 | 9.315658584 | 1.40E-18 |
| RAI2       | 1.005332131 | 3.676863779 | 7.903000867 | 3.59E-14 |
| CRABP2     | 1.006189457 | 4.086104569 | 4.910158665 | 1.40E-06 |
| PI16       | 1.006957503 | 1.696073803 | 6.052065418 | 3.69E-09 |
| ADGRA2     | 1.007174346 | 4.333999452 | 9.096654996 | 7.20E-18 |
| MLF1       | 1.00941867  | 2.159703175 | 7.687817922 | 1.53E-13 |
| ADGRD1     | 1.010788571 | 1.621322296 | 9.012992749 | 1.34E-17 |
| TPSAB1     | 1.011270831 | 4.360720974 | 6.422780869 | 4.38E-10 |
| CDH11      | 1.011276138 | 4.423796399 | 8.457451852 | 7.56E-16 |
| GLIS2      | 1.014390181 | 3.677506312 | 10.2316469  | 1.15E-21 |
| H19        | 1.014815763 | 4.445490922 | 4.142808277 | 4.31E-05 |
| CPED1      | 1.014820199 | 2.941335099 | 7.040704865 | 1.02E-11 |
| PTGER1     | 1.014923398 | 1.956131253 | 8.43976336  | 8.58E-16 |
| KCNMB1     | 1.019441987 | 2.540699336 | 6.61013496  | 1.44E-10 |
| PHLDB2     | 1.020264085 | 3.090155824 | 8.584441685 | 3.05E-16 |
| ITGA7      | 1.020801326 | 3.530445815 | 7.639819467 | 2.11E-13 |
| EML1       | 1.021660429 | 3.144468537 | 8.696356161 | 1.36E-16 |
| CRISPLD2   | 1.021984768 | 5.076586784 | 9.394388561 | 7.70E-19 |
| AC015922.2 | 1.022344473 | 3.219441371 | 8.7574221   | 8.74E-17 |
| EMILIN1    | 1.023429474 | 5.702155739 | 7.879966925 | 4.20E-14 |
| C16orf89   | 1.023878667 | 1.78059303  | 7.1460179   | 5.24E-12 |
| HABP2      | 1.024236597 | 3.177030146 | 4.755300296 | 2.90E-06 |
| TMEM119    | 1.024766969 | 4.008553167 | 7.959869454 | 2.44E-14 |
| BICC1      | 1.025426744 | 2.716726317 | 9.438645594 | 5.50E-19 |
| NPTXR      | 1.026324961 | 2.093892861 | 7.722333825 | 1.22E-13 |
| TWIST2     | 1.02925662  | 2.36011618  | 8.744327355 | 9.61E-17 |
| CAVIN2     | 1.029664742 | 3.328930524 | 7.434006376 | 8.20E-13 |
| TAFA5      | 1.029794033 | 2.402562844 | 9.351510824 | 1.06E-18 |
| ITIH5      | 1.03057478  | 2.879357062 | 8.116168916 | 8.31E-15 |
| CCN1       | 1.032479792 | 6.114272411 | 7.707442316 | 1.35E-13 |
| STON1      | 1.032604001 | 2.317696392 | 8.75767202  | 8.72E-17 |
| MAP1B      | 1.032972931 | 3.381025695 | 8.200585561 | 4.62E-15 |
| CHGA       | 1.033222292 | 2.365306565 | 3.986288619 | 8.17E-05 |
| COPZ2      | 1.033250896 | 3.832644032 | 9.577316587 | 1.91E-19 |
| PLSCR4     | 1.035157351 | 3.559064196 | 9.798939016 | 3.45E-20 |
| CAVIN1     | 1.035312288 | 6.396361072 | 8.79614873  | 6.59E-17 |
| SULF1      | 1.036508232 | 5.874630554 | 6.254136097 | 1.17E-09 |
| IGF2       | 1.037370749 | 4.715993293 | 4.484418643 | 9.93E-06 |
| CCDC8      | 1.03745374  | 1.921316565 | 8.97741573  | 1.74E-17 |



|             |             |             |             |             |
|-------------|-------------|-------------|-------------|-------------|
| CCL21       | 1.037513513 | 5.314727968 | 4.643822149 | 4.85E-06    |
| NNMT        | 1.037875595 | 5.487407063 | 8.229285965 | 3.78E-15    |
| TMOD1       | 1.038362374 | 1.860984545 | 8.266642174 | 2.91E-15    |
| TMEM47      | 1.038591212 | 3.797175964 | 9.079009217 | 8.21E-18    |
| TIMP3       | 1.040095931 | 2.980585651 | 8.05979965  | 1.23E-14    |
| SERTAD4-AS1 | 1.040291999 | 2.728409825 | 7.901632915 | 3.63E-14    |
| TGFB1I1     | 1.040656789 | 4.389617038 | 9.28778075  | 1.72E-18    |
| LAMA2       | 1.040997022 | 2.35910777  | 9.260953638 | 2.11E-18    |
| LRRC32      | 1.042298147 | 4.624085381 | 9.297612048 | 1.60E-18    |
| JAM3        | 1.043427096 | 3.664378987 | 10.05479531 | 4.67E-21    |
| SERPINA4    | 1.043604729 | 2.862241869 | 5.125692226 | 4.92E-07    |
| CLIP3       | 1.045033656 | 3.738927833 | 8.312775391 | 2.11E-15    |
| FSTL1       | 1.045095147 | 6.363177181 | 9.717307502 | 6.49E-20    |
| C14orf132   | 1.0450986   | 2.074370602 | 8.975700575 | 1.77E-17    |
| C1S         | 1.045207274 | 7.017838488 | 8.313320883 | 2.10E-15    |
| GFRA1       | 1.045689149 | 1.550939016 | 7.976089624 | 2.18E-14    |
| IGFBP6      | 1.045991755 | 4.544528943 | 8.934442898 | 2.39E-17    |
| MEIS3P1     | 1.046606676 | 2.787709027 | 9.36880803  | 9.34E-19    |
| ABCC9       | 1.046645916 | 2.117070569 | 8.584500131 | 3.05E-16    |
| CH25H       | 1.047630694 | 2.311566371 | 9.467484294 | 4.42E-19    |
| NTN1        | 1.049058264 | 2.942033393 | 7.285689318 | 2.15E-12    |
| APBB1       | 1.049155401 | 3.301436459 | 9.426585053 | 6.03E-19    |
| RASD1       | 1.049766678 | 2.977696397 | 7.282693054 | 2.19E-12    |
| FOXF1       | 1.050275142 | 3.941289991 | 8.564000554 | 3.53E-16    |
| OMD         | 1.050333393 | 1.925595644 | 6.978507347 | 1.51E-11    |
| EFEMP2      | 1.050558178 | 4.886607499 | 10.1177136  | 2.84E-21    |
| VCAN        | 1.052977457 | 4.783115002 | 8.235087782 | 3.63E-15    |
| OLFML3      | 1.055394475 | 4.607812359 | 8.44255359  | 8.41E-16    |
| COL3A1      | 1.056431578 | 9.206853803 | 7.254649298 | 2.62E-12    |
| PLIN4       | 1.057858762 | 1.800189048 | 5.855050997 | 1.10E-08    |
| BGN         | 1.05812447  | 8.472832125 | 7.905040868 | 3.54E-14    |
| ARMCX2      | 1.058415275 | 3.134445396 | 10.05051728 | 4.83E-21    |
| DUSP1       | 1.058486432 | 7.336030662 | 8.733153704 | 1.04E-16    |
| CLDN6       | 1.059040764 | 1.170847562 | 4.99266616  | 9.42E-07    |
| IGFBP4      | 1.059107943 | 8.389095697 | 8.443232218 | 8.37E-16    |
| PPP1R3C     | 1.059373834 | 2.13281746  | 7.889743346 | 3.93E-14    |
| RCAN2       | 1.059871713 | 3.51982576  | 8.663561342 | 1.73E-16    |
| ADAMTS1     | 1.061919001 | 4.048036357 | 9.001658988 | 1.46E-17    |
| CCN3        | 1.061925551 | 2.50318911  | 8.770027555 | 7.97E-17    |
| FGFR1       | 1.062462738 | 4.020435406 | 8.527654695 | 4.58E-16    |
| FLNA        | 1.062711725 | 8.166525103 | 6.674357923 | 9.77E-11    |
| CTSF        | 1.062764988 | 4.146078834 | 8.55151515  | 3.86E-16    |
| RASSF8      | 1.06442983  | 2.548110755 | 9.632588135 | 1.25E-19    |
| REG4        | 1.069786853 | 6.349396587 | 3.070570757 | 0.002303924 |
| SLC24A3     | 1.069987543 | 2.822645795 | 9.861208985 | 2.13E-20    |
| LTBP1       | 1.070675835 | 4.773700376 | 8.626760506 | 2.25E-16    |
| CRISPLD1    | 1.073877425 | 2.081284475 | 9.926753781 | 1.27E-20    |
| SLIT2       | 1.0744403   | 1.92401033  | 8.348836308 | 1.63E-15    |
| FABP4       | 1.075660198 | 2.14300725  | 6.316041829 | 8.16E-10    |
| FENDRR      | 1.075988555 | 3.178558318 | 7.734768159 | 1.12E-13    |
| ARHGEF25    | 1.076831588 | 2.77204779  | 8.71418178  | 1.20E-16    |
| MAOB        | 1.077410431 | 3.852558341 | 6.399804519 | 5.01E-10    |
| SELENOP     | 1.078342912 | 4.704217289 | 7.589296186 | 2.95E-13    |

|          |             |             |             |             |
|----------|-------------|-------------|-------------|-------------|
| SMO      | 1.079004054 | 2.879276123 | 9.526838952 | 2.81E-19    |
| IGFBP5   | 1.079616601 | 7.112460744 | 7.749605126 | 1.01E-13    |
| EHD2     | 1.080859489 | 6.178315717 | 9.882850107 | 1.80E-20    |
| MMP7     | 1.083417232 | 5.516417506 | 3.865028176 | 0.000132423 |
| FMOD     | 1.083983683 | 5.722314503 | 8.311310312 | 2.13E-15    |
| GAS1     | 1.084724283 | 2.951292276 | 6.831682137 | 3.74E-11    |
| CTHRC1   | 1.085765346 | 5.603125499 | 7.451201833 | 7.33E-13    |
| SORBS1   | 1.087458729 | 4.434177992 | 6.187360458 | 1.71E-09    |
| PDGFRL   | 1.087604745 | 2.156341936 | 9.732669123 | 5.77E-20    |
| LUM      | 1.091118749 | 7.895870225 | 8.313806502 | 2.09E-15    |
| C3       | 1.091165598 | 7.431804069 | 5.881411393 | 9.52E-09    |
| SGCE     | 1.091895081 | 3.848219839 | 9.540227077 | 2.53E-19    |
| HEYL     | 1.093356053 | 3.906564474 | 9.535728227 | 2.62E-19    |
| A2M      | 1.093964023 | 7.999163289 | 9.444146598 | 5.27E-19    |
| PDZRN3   | 1.095726447 | 3.353357814 | 8.089337658 | 1.00E-14    |
| SOD3     | 1.097384777 | 6.439783949 | 7.663760664 | 1.80E-13    |
| WWTR1    | 1.100435259 | 5.088537738 | 10.11927886 | 2.81E-21    |
| CES1     | 1.101363867 | 2.750375435 | 5.703189311 | 2.51E-08    |
| GREM2    | 1.103945768 | 1.732761223 | 7.600140841 | 2.75E-13    |
| ITGBL1   | 1.105133152 | 2.021177321 | 8.090891199 | 9.90E-15    |
| GXYLT2   | 1.105982234 | 2.400290168 | 9.37799968  | 8.71E-19    |
| CALD1    | 1.106203589 | 7.574185108 | 7.796256136 | 7.41E-14    |
| SERPINE1 | 1.106740264 | 5.518095995 | 7.299536351 | 1.96E-12    |
| FRZB     | 1.108225206 | 3.504831197 | 7.963625101 | 2.38E-14    |
| OBSL1    | 1.108752623 | 3.208340768 | 8.208280903 | 4.38E-15    |
| ZCCHC24  | 1.108837808 | 3.747227041 | 8.922321491 | 2.62E-17    |
| PDE3A    | 1.113581875 | 2.464002269 | 9.4110606   | 6.78E-19    |
| AHNAK2   | 1.11400282  | 2.954312705 | 6.79845677  | 4.59E-11    |
| INMT     | 1.114774097 | 2.528058357 | 8.852600103 | 4.36E-17    |
| SCARF2   | 1.114921402 | 3.872866524 | 9.318499284 | 1.37E-18    |
| VTN      | 1.115703818 | 1.854423244 | 6.158383043 | 2.02E-09    |
| TCEAL2   | 1.119277362 | 1.671691049 | 6.413568171 | 4.62E-10    |
| GEM      | 1.120491084 | 5.077248272 | 9.770872117 | 4.29E-20    |
| ISM1     | 1.122215577 | 1.931426594 | 8.469926473 | 6.92E-16    |
| FBN1     | 1.122216317 | 4.422429826 | 8.543043004 | 4.11E-16    |
| KCNMA1   | 1.122239096 | 2.318423562 | 6.378975506 | 5.66E-10    |
| FERMT2   | 1.122389891 | 3.962761993 | 9.274023516 | 1.91E-18    |
| GUCY1A1  | 1.122805296 | 3.772016915 | 8.092552477 | 9.78E-15    |
| GSTA1    | 1.123717796 | 3.833539991 | 4.356353503 | 1.74E-05    |
| PRUNE2   | 1.124985296 | 2.630034519 | 5.768976707 | 1.76E-08    |
| JPH2     | 1.126810654 | 2.301689904 | 6.689637977 | 8.90E-11    |
| GNAO1    | 1.128695761 | 2.183828991 | 7.324150734 | 1.67E-12    |
| CPA3     | 1.133629174 | 3.629990479 | 7.27386817  | 2.32E-12    |
| GPX3     | 1.134268782 | 5.705176353 | 8.929245915 | 2.49E-17    |
| DDR2     | 1.135507244 | 3.242953893 | 8.89249526  | 3.26E-17    |
| ABI3BP   | 1.137490895 | 2.965888996 | 6.948854039 | 1.81E-11    |
| ASPN     | 1.137607009 | 5.020334855 | 6.798616539 | 4.58E-11    |
| BEX2     | 1.138224255 | 1.872237679 | 7.032197226 | 1.08E-11    |
| FOSB     | 1.138937748 | 4.31685137  | 6.088097495 | 3.01E-09    |
| TTR      | 1.139592767 | 1.932813668 | 5.240562414 | 2.78E-07    |
| NR2F1    | 1.14015153  | 3.716429945 | 9.136477642 | 5.35E-18    |
| ADAM33   | 1.141986944 | 1.972114699 | 8.383419618 | 1.28E-15    |
| LDOC1    | 1.142838461 | 3.680750165 | 8.95763044  | 2.02E-17    |

|          |             |             |             |             |
|----------|-------------|-------------|-------------|-------------|
| TNXB     | 1.14385219  | 2.486160155 | 7.879830216 | 4.21E-14    |
| MATN3    | 1.145522976 | 2.191825928 | 9.140803535 | 5.18E-18    |
| FBXO17   | 1.146911472 | 2.44716811  | 9.425613438 | 6.07E-19    |
| HAND2    | 1.150720657 | 2.071252201 | 5.633687719 | 3.63E-08    |
| NDN      | 1.151299051 | 3.711162721 | 9.956065881 | 1.01E-20    |
| SSC5D    | 1.155513486 | 3.208594773 | 7.782655887 | 8.12E-14    |
| MN1      | 1.155964243 | 2.473423452 | 8.794120956 | 6.69E-17    |
| FXVD6    | 1.157244203 | 3.658475397 | 8.647795387 | 1.93E-16    |
| BEX3     | 1.157271426 | 5.683367406 | 8.853891912 | 4.32E-17    |
| C11orf96 | 1.157773562 | 5.750786891 | 9.415450303 | 6.56E-19    |
| UCHL1    | 1.160913247 | 2.981128976 | 7.299737044 | 1.96E-12    |
| CACNA1H  | 1.162038206 | 3.300746582 | 8.231115334 | 3.73E-15    |
| FN1      | 1.164206736 | 7.873318125 | 6.871055558 | 2.94E-11    |
| CAPN6    | 1.165464472 | 3.037928497 | 5.641645356 | 3.48E-08    |
| TIMP2    | 1.167554481 | 7.199037899 | 10.96886434 | 2.96E-24    |
| SERPINA1 | 1.173695744 | 7.275138442 | 5.704627253 | 2.49E-08    |
| SLIT3    | 1.175033756 | 2.819298036 | 9.008988152 | 1.38E-17    |
| PEG10    | 1.179208961 | 2.320609697 | 5.903828687 | 8.42E-09    |
| DEPP1    | 1.183201689 | 5.960247767 | 9.666084736 | 9.64E-20    |
| LTBP2    | 1.185430031 | 4.700641549 | 9.881788501 | 1.81E-20    |
| CLU      | 1.185704289 | 6.956503766 | 6.324984281 | 7.75E-10    |
| MSRB3    | 1.189190853 | 3.721893751 | 8.223280212 | 3.94E-15    |
| SERPINF1 | 1.190827525 | 6.398117635 | 9.047459218 | 1.04E-17    |
| SCARA3   | 1.19491862  | 3.443655594 | 8.680871765 | 1.52E-16    |
| MEDAG    | 1.195791361 | 2.722690091 | 9.638935883 | 1.19E-19    |
| TFF2     | 1.195942963 | 5.831194087 | 3.153493455 | 0.001753108 |
| SGCA     | 1.19698453  | 2.273896898 | 8.098220838 | 9.41E-15    |
| SNCG     | 1.197202954 | 3.094781227 | 8.739647867 | 9.94E-17    |
| THBS1    | 1.199425777 | 6.412305072 | 8.843212631 | 4.67E-17    |
| RSPO3    | 1.202284157 | 2.860223229 | 7.733361293 | 1.13E-13    |
| MIR100HG | 1.205533144 | 2.672917825 | 8.577143525 | 3.21E-16    |
| SLC7A2   | 1.206656063 | 2.32359976  | 7.884339462 | 4.08E-14    |
| MFAP2    | 1.206666787 | 3.982257054 | 8.92834535  | 2.50E-17    |
| CPXM2    | 1.207617231 | 3.361564053 | 7.251639544 | 2.67E-12    |
| FBLN2    | 1.208402569 | 4.407677303 | 7.854752698 | 4.99E-14    |
| CKB      | 1.20855386  | 6.139598752 | 6.85138841  | 3.31E-11    |
| SMOC2    | 1.209187327 | 4.759885465 | 6.680125116 | 9.43E-11    |
| NDNF     | 1.2110927   | 1.856512439 | 9.562359065 | 2.14E-19    |
| ROR2     | 1.211286653 | 2.735626043 | 9.403212728 | 7.20E-19    |
| CYS1     | 1.213715806 | 2.044744106 | 9.138154418 | 5.29E-18    |
| TPM2     | 1.214209255 | 7.098396207 | 7.72428383  | 1.20E-13    |
| ANTXR1   | 1.21795002  | 5.509314867 | 9.607831879 | 1.51E-19    |
| CYBRD1   | 1.218159067 | 5.104531537 | 9.086228548 | 7.79E-18    |
| DACT3    | 1.219036809 | 2.772015024 | 8.694172185 | 1.38E-16    |
| AEBP1    | 1.219234352 | 6.919584612 | 8.816352999 | 5.69E-17    |
| FGF7     | 1.219783346 | 2.600578254 | 9.287819666 | 1.72E-18    |
| F13A1    | 1.226935174 | 2.791045234 | 7.509035823 | 5.02E-13    |
| RAB34    | 1.227225706 | 5.226312395 | 10.3752826  | 3.67E-22    |
| ANPEP    | 1.229495345 | 5.806288543 | 4.344678124 | 1.83E-05    |
| MOXD1    | 1.232051019 | 3.220525494 | 9.569885672 | 2.02E-19    |
| RGMA     | 1.236264327 | 2.375225598 | 7.417127588 | 9.16E-13    |
| CST2     | 1.239356371 | 2.672753201 | 7.522652322 | 4.59E-13    |
| THBS2    | 1.239892043 | 5.277038658 | 7.071512148 | 8.40E-12    |

|          |             |             |             |             |
|----------|-------------|-------------|-------------|-------------|
| DCN      | 1.244526214 | 6.155547029 | 9.425217729 | 6.09E-19    |
| PSCA     | 1.245315705 | 5.548307066 | 3.54816256  | 0.000440926 |
| MMP2     | 1.247371978 | 7.124544008 | 9.252409516 | 2.25E-18    |
| MRVI1    | 1.249678563 | 3.871471518 | 9.001373444 | 1.46E-17    |
| CYP1B1   | 1.252797526 | 3.017956455 | 7.353879194 | 1.38E-12    |
| SLC22A17 | 1.253669829 | 2.925349319 | 11.00927993 | 2.13E-24    |
| LRRN1    | 1.256594493 | 1.615026195 | 8.454530795 | 7.72E-16    |
| FBLN5    | 1.260435643 | 4.993429141 | 10.44981671 | 2.02E-22    |
| SPARCL1  | 1.260734668 | 6.764269437 | 8.14496356  | 6.80E-15    |
| LIPF     | 1.263351924 | 3.550744019 | 3.039053528 | 0.002552123 |
| PALM     | 1.264023328 | 3.434228017 | 9.581700262 | 1.84E-19    |
| SRPX     | 1.267855597 | 3.034876926 | 9.532308548 | 2.69E-19    |
| RERG     | 1.270637938 | 2.749794015 | 9.578137826 | 1.90E-19    |
| PGM5     | 1.275140653 | 2.869933606 | 6.565121851 | 1.88E-10    |
| MFAP5    | 1.277598297 | 3.357596503 | 8.053577768 | 1.28E-14    |
| COL10A1  | 1.278354295 | 3.700516531 | 6.037737736 | 4.00E-09    |
| ISLR     | 1.285556155 | 5.683641471 | 7.703194953 | 1.38E-13    |
| MRGPRF   | 1.288536307 | 3.638434122 | 7.821431042 | 6.25E-14    |
| SERPINA5 | 1.290379181 | 2.218904156 | 8.221287624 | 4.00E-15    |
| PDLIM3   | 1.299469536 | 4.435114494 | 8.390478104 | 1.22E-15    |
| BOC      | 1.300563967 | 2.56505817  | 9.124391487 | 5.86E-18    |
| ADH1B    | 1.300829807 | 2.402351059 | 6.656198056 | 1.09E-10    |
| RBPM2    | 1.309475657 | 3.164061254 | 7.796190013 | 7.41E-14    |
| ACTA2    | 1.316546324 | 8.118292007 | 8.55434711  | 3.79E-16    |
| GPC3     | 1.317820254 | 3.243023567 | 6.38557598  | 5.44E-10    |
| AOC3     | 1.322608024 | 4.09263272  | 8.550026033 | 3.90E-16    |
| PPP1R14A | 1.324439611 | 4.283728262 | 9.148269693 | 4.90E-18    |
| FHL1     | 1.326069687 | 5.135961487 | 7.163250483 | 4.70E-12    |
| SPOCK1   | 1.327155722 | 3.245952124 | 8.046165313 | 1.35E-14    |
| SYNM     | 1.327910866 | 3.447336232 | 5.603425465 | 4.27E-08    |
| CRYAB    | 1.328275725 | 4.592980592 | 8.368760643 | 1.42E-15    |
| ACKR1    | 1.32833273  | 3.484924479 | 7.318715419 | 1.73E-12    |
| RBP4     | 1.33594531  | 3.457047526 | 5.869810857 | 1.01E-08    |
| TNS1     | 1.339314764 | 5.456201115 | 8.506409437 | 5.33E-16    |
| PLN      | 1.343934432 | 3.201799772 | 6.827864146 | 3.83E-11    |
| VSTM2L   | 1.344414501 | 2.000586918 | 8.244353679 | 3.40E-15    |
| ADCY5    | 1.346564801 | 2.220989987 | 8.970133201 | 1.84E-17    |
| PDK4     | 1.349573173 | 4.533799601 | 7.670618782 | 1.72E-13    |
| DPYSL3   | 1.3590345   | 5.398598033 | 8.563308722 | 3.55E-16    |
| SPINK4   | 1.359783077 | 3.833775778 | 4.185169372 | 3.61E-05    |
| AGT      | 1.360975237 | 4.769776455 | 8.260498989 | 3.04E-15    |
| HSPB8    | 1.361202448 | 3.953075273 | 7.808315987 | 6.83E-14    |
| AKAP12   | 1.369170539 | 3.420065463 | 9.692833005 | 7.85E-20    |
| MYLK     | 1.383680227 | 5.026923597 | 7.616831731 | 2.46E-13    |
| CPE      | 1.396201449 | 4.128956873 | 10.19115012 | 1.59E-21    |
| MXRA8    | 1.402762363 | 5.969632574 | 10.7447499  | 1.86E-23    |
| COL14A1  | 1.405980382 | 3.969119213 | 8.981405157 | 1.69E-17    |
| CCDC80   | 1.414092407 | 3.898833975 | 8.342935998 | 1.70E-15    |
| CHRD1    | 1.414433051 | 1.981854866 | 8.438896425 | 8.63E-16    |
| ECRG4    | 1.430270936 | 2.632399157 | 6.266162094 | 1.09E-09    |
| SFRP1    | 1.444671458 | 2.107786122 | 7.994602005 | 1.92E-14    |
| FNDC1    | 1.449427786 | 3.752949876 | 7.960103647 | 2.43E-14    |
| COL8A1   | 1.454674545 | 4.232220101 | 9.351921964 | 1.06E-18    |

|        |             |             |             |             |
|--------|-------------|-------------|-------------|-------------|
| APOA1  | 1.454920258 | 2.417868889 | 5.378778698 | 1.38E-07    |
| HMGCS2 | 1.456545854 | 4.765222918 | 5.26793366  | 2.42E-07    |
| EFEMP1 | 1.478748998 | 4.986494027 | 9.819821829 | 2.93E-20    |
| MYL9   | 1.492707186 | 7.466252858 | 8.599711597 | 2.73E-16    |
| FLNC   | 1.493437618 | 3.976301158 | 6.697401931 | 8.49E-11    |
| DKK1   | 1.497220477 | 2.765366605 | 5.936273501 | 7.03E-09    |
| TAGLN  | 1.49788078  | 6.953168989 | 8.265511686 | 2.93E-15    |
| BARX1  | 1.510059251 | 4.253273091 | 7.832244961 | 5.81E-14    |
| HSPB7  | 1.515615172 | 3.085560294 | 7.166130954 | 4.61E-12    |
| COMP   | 1.515842554 | 2.734713575 | 7.558702511 | 3.62E-13    |
| PGC    | 1.517966467 | 6.980637751 | 3.458615808 | 0.000610074 |
| LMOD1  | 1.519289    | 4.066236412 | 7.357651535 | 1.35E-12    |
| SYNPO2 | 1.521326095 | 4.061951786 | 6.396591989 | 5.10E-10    |
| GREM1  | 1.533375804 | 4.784621837 | 8.31770023  | 2.03E-15    |
| PCSK1N | 1.534041443 | 3.67290658  | 5.521565018 | 6.57E-08    |
| MGP    | 1.546887068 | 7.403526079 | 8.738875544 | 1.00E-16    |
| SPON1  | 1.550779116 | 4.291237744 | 8.923490169 | 2.59E-17    |
| ITLN1  | 1.552248117 | 3.017152393 | 5.597284711 | 4.41E-08    |
| PODN   | 1.574670852 | 4.582293592 | 10.37586058 | 3.65E-22    |
| WFDC2  | 1.588846932 | 5.2596051   | 5.921154774 | 7.65E-09    |
| ELN    | 1.617015688 | 4.833953191 | 10.80057187 | 1.18E-23    |
| ACTG2  | 1.624200769 | 6.936733334 | 5.814973588 | 1.37E-08    |
| PTGIS  | 1.625038139 | 3.183092099 | 9.238925124 | 2.49E-18    |
| PRELP  | 1.642704357 | 3.558711816 | 8.665900733 | 1.70E-16    |
| MFAP4  | 1.673981301 | 6.385369243 | 9.779169556 | 4.02E-20    |
| OGN    | 1.681265565 | 3.005299523 | 7.639017603 | 2.12E-13    |
| FBLN1  | 1.68673833  | 6.259287217 | 9.407240937 | 6.98E-19    |
| CNN1   | 1.697422201 | 5.813863091 | 6.597197088 | 1.55E-10    |
| C7     | 1.706142999 | 3.080627379 | 7.36835139  | 1.26E-12    |
| HSPB6  | 1.730635947 | 5.230726301 | 6.595970771 | 1.57E-10    |
| CHRD2  | 1.762383162 | 4.064723373 | 8.128160302 | 7.65E-15    |
| SFRP4  | 1.833486293 | 4.790825657 | 7.88518003  | 4.06E-14    |
| MYH11  | 1.894998396 | 6.453841163 | 6.706779346 | 8.03E-11    |
| DES    | 1.901516153 | 6.328971618 | 5.415183505 | 1.14E-07    |
| THBS4  | 1.922673246 | 3.453146863 | 8.080011149 | 1.07E-14    |
| APOD   | 2.03784399  | 5.9231248   | 8.651222295 | 1.89E-16    |
| SFRP2  | 2.05066345  | 5.660198841 | 7.812542558 | 6.63E-14    |

| adj.P.Val   | B            |
|-------------|--------------|
| 5.77E-07    | 8.80957102   |
| 0.000257599 | 2.333577107  |
| 0.000410567 | 1.833193308  |
| 3.62E-06    | 6.89055213   |
| 3.39E-09    | 14.22992669  |
| 3.33E-08    | 11.81474613  |
| 0.000734128 | 1.213629755  |
| 3.20E-06    | 7.020919695  |
| 0.009812371 | -1.593012168 |
| 0.000103118 | 3.311977207  |
| 7.04E-08    | 11.03065935  |
| 0.000100338 | 3.341072611  |
| 9.01E-06    | 5.917764309  |
| 0.022141823 | -2.491141198 |
| 0.015343028 | -2.087648616 |
| 0.000258112 | 2.331416064  |
| 0.009610222 | -1.571022562 |
| 8.97E-10    | 15.62460661  |
| 0.008899083 | -1.487966341 |
| 0.004449783 | -0.73077475  |
| 0.006585777 | -1.156758658 |
| 4.19E-06    | 6.736714457  |
| 9.75E-06    | 5.835517203  |
| 0.02020399  | -2.39045014  |
| 3.12E-07    | 9.456435876  |
| 3.86E-05    | 4.369025726  |
| 0.000106971 | 3.274308756  |
| 0.002634705 | -0.162775796 |
| 7.80E-06    | 6.068761435  |
| 9.03E-05    | 3.45270236   |
| 0.000833235 | 1.079074656  |
| 0.002194363 | 0.033754961  |
| 4.71E-05    | 4.155260297  |
| 6.75E-09    | 13.48217066  |
| 1.01E-12    | 23.0038349   |
| 2.27E-08    | 12.21761476  |
| 4.54E-05    | 4.194261777  |
| 1.43E-07    | 10.27876379  |
| 0.001316306 | 0.582009245  |
| 7.69E-07    | 8.508574194  |
| 6.17E-09    | 13.58008252  |
| 0.036017277 | -3.031306559 |
| 6.77E-09    | 13.4792509   |
| 0.000754768 | 1.183790686  |
| 1.10E-08    | 12.97482088  |
| 2.16E-13    | 24.72011963  |
| 3.21E-05    | 4.568264091  |
| 0.00020207  | 2.593141227  |
| 0.002376244 | -0.053425055 |

|             |              |
|-------------|--------------|
| 5.96E-06    | 6.361654314  |
| 1.31E-14    | 27.96005947  |
| 0.003570905 | -0.493073623 |
| 1.45E-14    | 27.84195625  |
| 6.19E-05    | 3.857098497  |
| 1.18E-08    | 12.90404675  |
| 5.52E-09    | 13.70229521  |
| 5.01E-06    | 6.542139715  |
| 3.12E-12    | 21.77733183  |
| 5.79E-11    | 18.56536039  |
| 3.55E-06    | 6.910821188  |
| 2.02E-10    | 17.21466309  |
| 0.00010999  | 3.2455114    |
| 4.36E-14    | 26.55019782  |
| 4.63E-09    | 13.89640653  |
| 6.85E-05    | 3.747422474  |
| 4.09E-11    | 18.94573405  |
| 1.69E-06    | 7.685583314  |
| 0.001987776 | 0.140821032  |
| 7.37E-07    | 8.55333293   |
| 4.20E-05    | 4.277567815  |
| 0.000430521 | 1.781090405  |
| 2.22E-14    | 27.30635337  |
| 2.65E-09    | 14.49536302  |
| 4.33E-05    | 4.242899575  |
| 4.11E-05    | 4.301170365  |
| 2.07E-07    | 9.890209806  |
| 6.42E-05    | 3.8183044    |
| 2.91E-10    | 16.82767159  |
| 0.003889237 | -0.58620739  |
| 3.77E-11    | 19.03288917  |
| 9.45E-05    | 3.404696827  |
| 5.06E-05    | 4.076562896  |
| 1.15E-07    | 10.51257004  |
| 3.30E-05    | 4.535572773  |
| 1.42E-09    | 15.14721201  |
| 1.80E-09    | 14.88934912  |
| 0.000644469 | 1.353212635  |
| 2.97E-06    | 7.097417379  |
| 9.53E-11    | 18.03361967  |
| 0.000113421 | 3.212848858  |
| 7.10E-15    | 28.61517504  |
| 6.56E-08    | 11.10140873  |
| 7.61E-13    | 23.32071464  |
| 2.00E-11    | 19.72961785  |
| 1.78E-14    | 27.58706846  |
| 4.34E-06    | 6.697340722  |
| 1.37E-09    | 15.18728639  |
| 2.91E-11    | 19.30432619  |
| 1.75E-08    | 12.49132752  |
| 0.000155931 | 2.871310675  |
| 1.38E-06    | 7.895633068  |
| 0.000204596 | 2.580191277  |

|             |              |
|-------------|--------------|
| 4.50E-13    | 23.90997289  |
| 1.15E-13    | 25.42451229  |
| 1.41E-10    | 17.61409345  |
| 1.34E-06    | 7.930455515  |
| 3.59E-12    | 21.61233371  |
| 0.002567162 | -0.134364908 |
| 1.00E-09    | 15.50798286  |
| 3.67E-11    | 19.05973905  |
| 1.27E-12    | 22.75463987  |
| 1.16E-08    | 12.91991076  |
| 1.10E-11    | 20.38161629  |
| 5.96E-06    | 6.362317378  |
| 2.99E-08    | 11.92920645  |
| 5.09E-08    | 11.36920978  |
| 1.85E-06    | 7.587468763  |
| 5.57E-05    | 3.969874793  |
| 0.00018432  | 2.694232012  |
| 0.002569839 | -0.135498375 |
| 1.66E-12    | 22.45275919  |
| 8.37E-10    | 15.69767551  |
| 7.10E-15    | 28.61042173  |
| 5.43E-05    | 3.997497058  |
| 1.83E-15    | 30.28403364  |
| 8.53E-07    | 8.399643065  |
| 0.000191165 | 2.654045101  |
| 2.68E-12    | 21.93771247  |
| 4.40E-17    | 34.92227056  |
| 1.32E-07    | 10.3628206   |
| 1.66E-09    | 14.97904204  |
| 5.20E-07    | 8.921398576  |
| 0.001407656 | 0.510388245  |
| 7.21E-06    | 6.154389701  |
| 7.93E-05    | 3.592533463  |
| 0.001553831 | 0.404818464  |
| 6.42E-13    | 23.50576689  |
| 4.51E-09    | 13.92376343  |
| 1.78E-13    | 24.94532074  |
| 3.47E-08    | 11.76990534  |
| 4.70E-06    | 6.610861519  |
| 5.49E-14    | 26.29057598  |
| 7.72E-09    | 13.34000113  |
| 0.000383203 | 1.906729242  |
| 1.67E-11    | 19.91964594  |
| 3.30E-08    | 11.82544685  |
| 1.40E-06    | 7.879843094  |
| 1.40E-15    | 30.57868105  |
| 0.000606543 | 1.415312692  |
| 2.00E-10    | 17.22895305  |
| 6.60E-09    | 13.50752724  |
| 3.79E-10    | 16.54654767  |
| 2.71E-10    | 16.90337744  |
| 0.000475108 | 1.673043938  |
| 1.75E-10    | 17.37643492  |



|             |              |
|-------------|--------------|
| 1.17E-07    | 10.49252174  |
| 3.83E-09    | 14.10064979  |
| 9.09E-11    | 18.08414969  |
| 2.76E-14    | 27.07291377  |
| 6.01E-05    | 3.887403868  |
| 1.44E-12    | 22.61851595  |
| 7.26E-09    | 13.407817    |
| 1.04E-11    | 20.44073499  |
| 0.011726616 | -1.787960707 |
| 3.90E-11    | 18.99486374  |
| 1.73E-05    | 5.230627248  |
| 5.05E-10    | 16.23558646  |
| 2.23E-16    | 32.75830114  |
| 9.28E-08    | 10.73874007  |
| 1.10E-09    | 15.41598807  |
| 3.05E-08    | 11.90790385  |
| 5.96E-06    | 6.362238723  |
| 4.92E-12    | 21.26827877  |
| 4.96E-05    | 4.097613646  |
| 8.77E-09    | 13.20698864  |
| 1.00E-05    | 5.808188554  |
| 2.49E-12    | 22.01499741  |
| 4.36E-06    | 6.691628772  |
| 1.93E-05    | 5.110255311  |
| 0.000763604 | 1.172480259  |
| 4.55E-06    | 6.644281918  |
| 1.85E-09    | 14.86149497  |
| 3.23E-06    | 7.009609907  |
| 4.78E-13    | 23.83991898  |
| 0.001200095 | 0.680405049  |
| 0.044359267 | -3.271169809 |
| 5.11E-05    | 4.063828489  |
| 1.29E-09    | 15.24730392  |
| 3.86E-11    | 19.00565493  |
| 4.98E-07    | 8.965771755  |
| 1.50E-10    | 17.54503981  |
| 1.31E-10    | 17.69670286  |
| 3.40E-05    | 4.503486737  |
| 2.26E-09    | 14.65945634  |
| 3.83E-05    | 4.377802155  |
| 5.82E-13    | 23.61460126  |
| 3.14E-08    | 11.88035373  |
| 3.38E-10    | 16.66477044  |
| 1.74E-07    | 10.07193525  |
| 7.30E-13    | 23.36803001  |
| 1.58E-12    | 22.50484276  |
| 0.000164915 | 2.811308728  |
| 7.56E-06    | 6.102646099  |
| 3.95E-13    | 24.0604551   |
| 0.008054465 | -1.37720238  |
| 1.56E-11    | 19.99451372  |
| 1.55E-10    | 17.51253111  |
| 7.92E-05    | 3.59359123   |

|             |              |
|-------------|--------------|
| 6.82E-12    | 20.90152987  |
| 0.003262259 | -0.395368471 |
| 0.015876335 | -2.124654229 |
| 1.25E-08    | 12.83906861  |
| 3.27E-06    | 6.995329348  |
| 8.61E-09    | 13.22581128  |
| 2.66E-07    | 9.621443769  |
| 2.88E-10    | 16.83747488  |
| 0.001207811 | 0.673108617  |
| 3.84E-08    | 11.66597651  |
| 5.12E-10    | 16.22108988  |
| 2.19E-12    | 22.1597132   |
| 2.33E-12    | 22.09007399  |
| 4.11E-08    | 11.59591123  |
| 3.32E-15    | 29.5322626   |
| 6.59E-14    | 26.06944126  |
| 0.000124052 | 3.119295206  |
| 5.15E-09    | 13.77648882  |
| 3.06E-14    | 26.95511599  |
| 7.56E-07    | 8.526087648  |
| 3.57E-11    | 19.08902037  |
| 0.0224898   | -2.508908019 |
| 1.20E-05    | 5.612052833  |
| 8.27E-08    | 10.86005054  |
| 0.000126896 | 3.095495434  |
| 3.41E-08    | 11.78901105  |
| 2.82E-08    | 11.99269105  |
| 4.65E-05    | 4.169430109  |
| 2.84E-06    | 7.144154226  |
| 4.28E-09    | 13.98246401  |
| 1.77E-07    | 10.05700031  |
| 5.33E-09    | 13.73765524  |
| 5.36E-05    | 4.012411587  |
| 2.04E-11    | 19.70365253  |
| 7.85E-06    | 6.063213923  |
| 3.00E-07    | 9.497375322  |
| 4.68E-10    | 16.31567319  |
| 2.33E-08    | 12.18916017  |
| 7.00E-10    | 15.88685755  |
| 9.70E-12    | 20.52340812  |
| 4.49E-11    | 18.84319267  |
| 3.38E-12    | 21.68460374  |
| 4.64E-11    | 18.80482497  |
| 2.88E-08    | 11.97280122  |
| 1.34E-07    | 10.34802724  |
| 3.11E-10    | 16.75093527  |
| 2.06E-08    | 12.31787718  |
| 6.03E-09    | 13.60394237  |
| 1.05E-09    | 15.4631255   |
| 0.001226813 | 0.657034933  |
| 5.99E-09    | 13.6128821   |
| 2.58E-05    | 4.803178449  |
| 2.81E-10    | 16.8639303   |

|             |              |
|-------------|--------------|
| 9.88E-16    | 30.95271255  |
| 9.73E-05    | 3.373447046  |
| 2.24E-08    | 12.23187843  |
| 6.54E-10    | 15.96247686  |
| 1.23E-13    | 25.35420469  |
| 1.42E-05    | 5.441697811  |
| 0.001107343 | 0.77064004   |
| 2.44E-11    | 19.49995894  |
| 0.000707495 | 1.251729856  |
| 0.002639813 | -0.165233883 |
| 1.20E-09    | 15.32245928  |
| 2.96E-10    | 16.80760364  |
| 3.51E-09    | 14.19407821  |
| 0.000204409 | 2.581298344  |
| 7.86E-12    | 20.7554991   |
| 6.05E-06    | 6.345098489  |
| 1.40E-05    | 5.453600098  |
| 8.89E-13    | 23.14757369  |
| 5.20E-07    | 8.92044104   |
| 8.24E-05    | 3.551391147  |
| 3.84E-10    | 16.53151468  |
| 2.22E-07    | 9.818684689  |
| 1.37E-11    | 20.13152628  |
| 2.95E-07    | 9.512605581  |
| 2.47E-05    | 4.848230987  |
| 1.15E-11    | 20.32645915  |
| 1.76E-08    | 12.48438004  |
| 8.43E-05    | 3.526146286  |
| 1.69E-10    | 17.41278048  |
| 4.38E-12    | 21.39310942  |
| 3.13E-05    | 4.594471098  |
| 3.39E-08    | 11.79546768  |
| 2.41E-10    | 17.0279186   |
| 1.28E-11    | 20.19962197  |
| 2.57E-11    | 19.44134784  |
| 2.37E-10    | 17.04786001  |
| 1.99E-12    | 22.2717434   |
| 2.84E-06    | 7.146992088  |
| 0.013386001 | -1.936343168 |
| 1.75E-10    | 17.3722748   |
| 4.93E-08    | 11.40463369  |
| 1.80E-11    | 19.8395197   |
| 1.30E-08    | 12.79930746  |
| 1.97E-10    | 17.24927606  |
| 1.57E-12    | 22.51514307  |
| 1.09E-11    | 20.39681742  |
| 0.001088351 | 0.789132892  |
| 0.040051941 | -3.152358751 |
| 0.000147702 | 2.93019204   |
| 1.16E-07    | 10.50008135  |
| 2.82E-12    | 21.88215511  |
| 0.00022865  | 2.461499227  |
| 1.42E-07    | 10.29011292  |

|             |              |
|-------------|--------------|
| 6.92E-05    | 3.736517819  |
| 1.23E-08    | 12.85417922  |
| 5.48E-06    | 6.448659769  |
| 3.50E-11    | 19.11096715  |
| 1.59E-05    | 5.32230178   |
| 5.26E-08    | 11.33301392  |
| 9.72E-08    | 10.68753716  |
| 2.45E-11    | 19.49700301  |
| 1.40E-09    | 15.16225555  |
| 0.013965886 | -1.982242609 |
| 3.56E-12    | 21.62308522  |
| 1.79E-06    | 7.626088524  |
| 0.000515531 | 1.588401488  |
| 1.95E-10    | 17.2626358   |
| 6.66E-09    | 13.4959692   |
| 5.73E-13    | 23.63527855  |
| 3.52E-05    | 4.466871454  |
| 1.17E-09    | 15.35176941  |
| 0.000110081 | 3.244254408  |
| 2.26E-09    | 14.65810481  |
| 2.12E-05    | 5.011559872  |
| 3.99E-10    | 16.49210305  |
| 5.09E-14    | 26.37659546  |
| 1.94E-05    | 5.105529082  |
| 0.002628697 | -0.160161306 |
| 1.68E-05    | 5.263048661  |
| 0.002231331 | 0.016171955  |
| 0.000125952 | 3.103087169  |
| 2.34E-06    | 7.351277547  |
| 6.48E-11    | 18.44665129  |
| 9.14E-12    | 20.5907113   |
| 5.73E-13    | 23.63386668  |
| 3.22E-12    | 21.73836265  |
| 1.81E-11    | 19.83081613  |
| 0.021221732 | -2.443027366 |
| 6.98E-10    | 15.89007468  |
| 1.59E-06    | 7.753112096  |
| 0.000325434 | 2.081738402  |
| 2.58E-08    | 12.08600246  |
| 1.95E-10    | 17.26044247  |
| 0.008764142 | -1.472408005 |
| 8.55E-09    | 13.23337293  |
| 1.91E-16    | 32.97065828  |
| 0.002432412 | -0.079142048 |
| 4.45E-05    | 4.215818818  |
| 3.56E-08    | 11.74151347  |
| 1.57E-14    | 27.72063532  |
| 9.11E-14    | 25.69146828  |
| 7.69E-09    | 13.34438339  |
| 4.99E-07    | 8.962284798  |
| 1.37E-09    | 15.18923456  |
| 0.009645049 | -1.574974103 |
| 1.43E-07    | 10.28137911  |

|             |              |
|-------------|--------------|
| 0.041851097 | -3.204519844 |
| 2.39E-09    | 14.60371749  |
| 0.002758245 | -0.214825213 |
| 3.92E-12    | 21.51803169  |
| 1.12E-11    | 20.36159447  |
| 1.42E-09    | 15.14912361  |
| 2.24E-05    | 4.949476552  |
| 4.94E-12    | 21.26190386  |
| 5.34E-11    | 18.65072409  |
| 5.21E-07    | 8.917261931  |
| 1.65E-10    | 17.4397178   |
| 2.68E-07    | 9.614032072  |
| 1.81E-14    | 27.5664225   |
| 2.22E-14    | 27.30831172  |
| 3.34E-07    | 9.382456982  |
| 5.46E-06    | 6.453627132  |
| 1.95E-06    | 7.537629398  |
| 6.31E-07    | 8.717162481  |
| 1.22E-09    | 15.30531459  |
| 1.67E-08    | 12.53549823  |
| 2.17E-09    | 14.70141384  |
| 1.30E-08    | 12.79740191  |
| 3.81E-08    | 11.67414612  |
| 1.93E-07    | 9.964190393  |
| 1.24E-08    | 12.84551091  |
| 3.25E-07    | 9.413323784  |
| 3.08E-06    | 7.061015369  |
| 2.04E-07    | 9.907745126  |
| 2.30E-11    | 19.5691347   |
| 8.83E-09    | 13.19934796  |
| 1.04E-08    | 13.02778785  |
| 3.34E-08    | 11.81188522  |
| 1.02E-13    | 25.55898217  |
| 0.000743855 | 1.200278698  |
| 3.55E-10    | 16.61293434  |
| 3.28E-12    | 21.71945874  |
| 1.33E-10    | 17.68032355  |
| 1.23E-14    | 28.0261619   |
| 0.000941149 | 0.948843683  |
| 6.71E-11    | 18.40926664  |
| 0.000232356 | 2.445611187  |
| 1.84E-10    | 17.32122344  |
| 3.13E-13    | 24.32848084  |
| 1.35E-16    | 33.49627496  |
| 2.58E-08    | 12.08485447  |
| 2.57E-11    | 19.44258587  |
| 0.022987305 | -2.532948717 |
| 4.06E-05    | 4.312833324  |
| 2.06E-11    | 19.69386913  |
| 2.43E-11    | 19.50906711  |
| 3.95E-09    | 14.06859623  |
| 0.006477303 | -1.137160029 |
| 7.60E-09    | 13.35798278  |

|             |              |
|-------------|--------------|
| 2.44E-07    | 9.715327317  |
| 1.16E-05    | 5.647072432  |
| 1.52E-14    | 27.78228058  |
| 9.29E-07    | 8.30986202   |
| 1.02E-13    | 25.56064737  |
| 8.73E-10    | 15.65453773  |
| 1.93E-07    | 9.965730039  |
| 2.44E-07    | 9.714822357  |
| 1.13E-06    | 8.105012809  |
| 2.42E-10    | 17.02628504  |
| 0.028748117 | -2.777075596 |
| 2.99E-09    | 14.36635643  |
| 5.05E-08    | 11.37866983  |
| 2.47E-05    | 4.851154353  |
| 2.57E-12    | 21.97927902  |
| 1.17E-11    | 20.30508068  |
| 3.21E-05    | 4.56691589   |
| 5.20E-09    | 13.76654989  |
| 6.05E-10    | 16.04567638  |
| 9.85E-17    | 33.98565108  |
| 3.92E-07    | 9.214321105  |
| 3.65E-09    | 14.15208969  |
| 2.28E-16    | 32.7269881   |
| 1.24E-08    | 12.84605731  |
| 1.19E-07    | 10.46595741  |
| 4.46E-15    | 29.18814022  |
| 1.25E-11    | 20.23576044  |
| 1.73E-11    | 19.87809513  |
| 1.07E-07    | 10.58499681  |
| 2.71E-10    | 16.90217871  |
| 1.15E-11    | 20.32010341  |
| 3.99E-14    | 26.65049136  |
| 9.95E-09    | 13.07914697  |
| 0.000204166 | 2.582666548  |
| 4.27E-05    | 4.259467634  |
| 1.75E-05    | 5.217415434  |
| 3.13E-09    | 14.3129851   |
| 4.63E-07    | 9.040091733  |
| 1.96E-13    | 24.83061436  |
| 0.01759675  | -2.236436627 |
| 3.84E-05    | 4.376174849  |
| 0.000115165 | 3.195952948  |
| 2.60E-11    | 19.42780645  |
| 8.58E-05    | 3.505375638  |
| 3.18E-14    | 26.91249463  |
| 8.85E-06    | 5.937899726  |
| 6.56E-14    | 26.07962144  |
| 3.71E-09    | 14.13434256  |
| 7.65E-16    | 31.26535971  |
| 1.52E-10    | 17.53004309  |
| 2.18E-11    | 19.63237144  |
| 1.34E-05    | 5.50094028   |
| 4.70E-07    | 9.022574096  |

|             |             |
|-------------|-------------|
| 2.48E-13    | 24.57625961 |
| 1.72E-09    | 14.94326562 |
| 3.34E-13    | 24.24806261 |
| 9.62E-12    | 20.53467203 |
| 1.47E-12    | 22.59066581 |
| 5.48E-06    | 6.44911991  |
| 4.29E-11    | 18.89430417 |
| 1.64E-07    | 10.13566272 |
| 1.02E-10    | 17.95946804 |
| 1.77E-09    | 14.91553168 |
| 3.64E-14    | 26.75550487 |
| 5.38E-08    | 11.30889884 |
| 0.002061833 | 0.101612664 |
| 4.34E-10    | 16.39933837 |
| 1.45E-07    | 10.26385925 |
| 1.25E-07    | 10.42348283 |
| 0.000348036 | 2.009210531 |
| 5.62E-09    | 13.68276606 |
| 5.79E-14    | 26.2255655  |
| 1.94E-05    | 5.101226652 |
| 1.55E-12    | 22.53523881 |
| 7.90E-11    | 18.23751116 |
| 2.37E-11    | 19.53374801 |
| 6.92E-10    | 15.90056927 |
| 8.63E-13    | 23.18011499 |
| 4.67E-09    | 13.88517484 |
| 4.97E-12    | 21.25467661 |
| 9.48E-05    | 3.400436422 |
| 1.16E-16    | 33.75415547 |
| 7.62E-10    | 15.79878787 |
| 3.51E-08    | 11.75665701 |
| 0.000343718 | 2.022319239 |
| 1.01E-07    | 10.65182205 |
| 7.49E-09    | 13.37421867 |
| 3.67E-06    | 6.875342467 |
| 5.92E-11    | 18.54307086 |
| 5.22E-11    | 18.67591878 |
| 1.37E-10    | 17.64125963 |
| 8.51E-09    | 13.23861342 |
| 5.90E-13    | 23.59681182 |
| 8.06E-12    | 20.72545449 |
| 1.67E-06    | 7.700560255 |
| 1.71E-11    | 19.89016183 |
| 2.20E-14    | 27.32263189 |
| 6.51E-09    | 13.5222729  |
| 1.15E-06    | 8.088545504 |
| 2.55E-07    | 9.664344802 |
| 3.30E-05    | 4.53568045  |
| 1.29E-10    | 17.70974925 |
| 1.10E-05    | 5.707863846 |
| 3.63E-10    | 16.59050838 |
| 6.80E-06    | 6.216321291 |
| 2.83E-07    | 9.556366581 |

|             |              |
|-------------|--------------|
| 5.86E-10    | 16.07837951  |
| 1.11E-08    | 12.96750984  |
| 4.42E-07    | 9.086837745  |
| 0.00127131  | 0.619296792  |
| 1.02E-13    | 25.56925598  |
| 5.36E-10    | 16.17033046  |
| 4.87E-11    | 18.7530513   |
| 1.29E-12    | 22.73432198  |
| 0.032156361 | -2.90429632  |
| 7.62E-10    | 15.80000558  |
| 0.000190649 | 2.657870231  |
| 3.40E-08    | 11.79277413  |
| 7.12E-13    | 23.39641298  |
| 5.32E-05    | 4.019201621  |
| 8.62E-14    | 25.75693051  |
| 0.007396181 | -1.284135346 |
| 1.94E-08    | 12.37982883  |
| 2.53E-11    | 19.461011    |
| 7.40E-09    | 13.38725923  |
| 1.07E-07    | 10.58231711  |
| 0.000836382 | 1.075144922  |
| 1.52E-10    | 17.53165793  |
| 1.30E-08    | 12.79939288  |
| 0.000299224 | 2.168846308  |
| 2.22E-10    | 17.11692861  |
| 1.76E-06    | 7.641630933  |
| 1.69E-12    | 22.43465592  |
| 2.63E-11    | 19.41249515  |
| 1.33E-18    | 39.35487091  |
| 4.24E-07    | 9.131480953  |
| 0.000190996 | 2.655192302  |
| 8.46E-12    | 20.67525759  |
| 4.72E-05    | 4.151018406  |
| 5.26E-12    | 21.18558824  |
| 1.58E-07    | 10.17083397  |
| 4.63E-12    | 21.33773719  |
| 0.046810418 | -3.332169421 |
| 1.12E-14    | 28.13004667  |
| 9.63E-14    | 25.6344109   |
| 1.06E-16    | 33.86879476  |
| 6.10E-10    | 16.03550542  |
| 1.78E-05    | 5.201839488  |
| 1.16E-08    | 12.92086513  |
| 5.79E-06    | 6.391964442  |
| 9.08E-10    | 15.61237326  |
| 2.01E-09    | 14.77717807  |
| 1.47E-08    | 12.67152216  |
| 5.14E-12    | 21.21615208  |
| 1.75E-13    | 24.9632496   |
| 5.73E-13    | 23.63375884  |
| 1.42E-12    | 22.63766901  |
| 2.20E-11    | 19.61743639  |
| 1.00E-12    | 23.01501073  |



|             |              |
|-------------|--------------|
| 1.99E-12    | 22.27360988  |
| 3.38E-14    | 26.83568265  |
| 1.66E-10    | 17.43027624  |
| 8.52E-06    | 5.97809316   |
| 9.53E-11    | 18.03452226  |
| 4.30E-10    | 16.40949302  |
| 3.95E-13    | 24.05712229  |
| 5.68E-08    | 11.24909712  |
| 0.03386031  | -2.96213582  |
| 2.52E-10    | 16.98038175  |
| 1.09E-06    | 8.144831315  |
| 6.17E-10    | 16.02212025  |
| 3.15E-13    | 24.31739516  |
| 0.048363771 | -3.368326764 |
| 6.25E-12    | 20.99524716  |
| 5.68E-07    | 8.827046085  |
| 2.24E-15    | 30.02705536  |
| 4.39E-07    | 9.096725647  |
| 2.03E-12    | 22.24558999  |
| 8.78E-08    | 10.79585452  |
| 1.82E-13    | 24.91316099  |
| 4.15E-09    | 14.0147918   |
| 0.026697647 | -2.69668528  |
| 4.37E-10    | 16.39291112  |
| 4.66E-12    | 21.32836195  |
| 5.25E-05    | 4.032566131  |
| 4.01E-08    | 11.62167906  |
| 3.33E-05    | 4.526304371  |
| 1.75E-06    | 7.646460518  |
| 3.24E-11    | 19.19535156  |
| 4.70E-07    | 9.024660575  |
| 5.39E-11    | 18.63820722  |
| 0.001658484 | 0.333263727  |
| 9.70E-14    | 25.62147715  |
| 1.98E-05    | 5.081116681  |
| 3.00E-10    | 16.79062427  |
| 4.58E-05    | 4.185252884  |
| 3.08E-08    | 11.89721154  |
| 1.27E-11    | 20.21405606  |
| 5.55E-08    | 11.2726391   |
| 2.39E-09    | 14.60034381  |
| 4.89E-09    | 13.83003794  |
| 8.43E-08    | 10.83860232  |
| 7.31E-16    | 31.32730145  |
| 2.87E-19    | 41.95944801  |
| 8.27E-13    | 23.22733029  |
| 3.95E-09    | 14.06641764  |
| 8.07E-07    | 8.457932012  |
| 6.34E-12    | 20.97846088  |
| 6.92E-11    | 18.37653621  |
| 2.07E-14    | 27.41574503  |
| 8.63E-07    | 8.387861818  |
| 6.59E-14    | 26.06581879  |

|             |              |
|-------------|--------------|
| 3.25E-11    | 19.19053853  |
| 2.83E-07    | 9.556764427  |
| 2.99E-15    | 29.6639042   |
| 4.78E-12    | 21.30052487  |
| 8.02E-09    | 13.29854488  |
| 3.17E-13    | 24.31130872  |
| 7.98E-10    | 15.74758554  |
| 3.07E-09    | 14.33433859  |
| 1.13E-11    | 20.34872758  |
| 1.00E-11    | 20.49009056  |
| 4.64E-09    | 13.89258119  |
| 5.22E-10    | 16.19779404  |
| 3.04E-12    | 21.80776077  |
| 1.02E-11    | 20.46732704  |
| 7.69E-12    | 20.77821121  |
| 3.23E-08    | 11.84673025  |
| 0.00116636  | 0.712867671  |
| 2.38E-16    | 32.67604825  |
| 6.00E-09    | 13.60967498  |
| 1.12E-12    | 22.88516629  |
| 1.28E-12    | 22.74075609  |
| 2.19E-14    | 27.33860124  |
| 0.017711636 | -2.244687584 |
| 4.64E-11    | 18.80363397  |
| 1.84E-10    | 17.3206097   |
| 4.77E-13    | 23.84620999  |
| 1.33E-13    | 25.26292098  |
| 7.65E-10    | 15.79364338  |
| 2.48E-10    | 16.99983152  |
| 2.56E-15    | 29.84220668  |
| 7.96E-11    | 18.22384216  |
| 5.28E-11    | 18.66322801  |
| 8.23E-10    | 15.71632925  |
| 1.06E-09    | 15.45056178  |
| 4.97E-07    | 8.967593264  |
| 4.93E-14    | 26.4163698   |
| 2.87E-09    | 14.40681997  |
| 3.16E-11    | 19.22131262  |
| 2.48E-15    | 29.88902683  |
| 1.21E-16    | 33.66721424  |
| 0.000140463 | 2.984634237  |
| 1.74E-12    | 22.40445739  |
| 7.78E-13    | 23.29513612  |
| 1.17E-07    | 10.49041066  |
| 4.09E-11    | 18.94368233  |
| 1.62E-08    | 12.57503446  |
| 1.19E-07    | 10.46746273  |
| 4.61E-10    | 16.33288028  |
| 2.69E-13    | 24.49006086  |
| 6.39E-14    | 26.10881513  |
| 1.18E-11    | 20.29258492  |
| 5.02E-13    | 23.78681181  |
| 2.96E-11    | 19.28616022  |

|             |              |
|-------------|--------------|
| 6.65E-08    | 11.08835093  |
| 4.87E-14    | 26.43365487  |
| 6.37E-05    | 3.826310774  |
| 8.65E-12    | 20.65316669  |
| 4.97E-09    | 13.81445611  |
| 0.000885991 | 1.013642103  |
| 1.03E-07    | 10.623642    |
| 1.80E-11    | 19.83948378  |
| 4.32E-12    | 21.40869467  |
| 3.16E-07    | 9.443427749  |
| 5.91E-17    | 34.58087229  |
| 6.83E-11    | 18.39105567  |
| 1.40E-07    | 10.30002138  |
| 9.75E-10    | 15.53852923  |
| 2.08E-13    | 24.76073784  |
| 3.42E-12    | 21.66891489  |
| 2.11E-09    | 14.72890764  |
| 7.28E-16    | 31.35275677  |
| 7.77E-09    | 13.33178294  |
| 6.55E-12    | 20.94595368  |
| 3.54E-07    | 9.323444713  |
| 5.02E-10    | 16.24152484  |
| 2.91E-10    | 16.82349689  |
| 4.35E-08    | 11.53513278  |
| 1.25E-08    | 12.83593633  |
| 9.60E-16    | 31.00711567  |
| 2.03E-12    | 22.23986839  |
| 6.18E-08    | 11.16435756  |
| 7.96E-11    | 18.22491577  |
| 5.40E-08    | 11.302437    |
| 2.33E-10    | 17.06621831  |
| 2.72E-10    | 16.89872834  |
| 0.000327486 | 2.073994884  |
| 2.23E-07    | 9.811883804  |
| 4.45E-08    | 11.50922225  |
| 1.50E-08    | 12.64945727  |
| 2.73E-10    | 16.89424074  |
| 3.86E-11    | 19.00661963  |
| 1.14E-14    | 28.1041747   |
| 4.43E-10    | 16.37691424  |
| 1.04E-07    | 10.61950877  |
| 0.000144884 | 2.950710689  |
| 0.042906599 | -3.232578142 |
| 3.25E-09    | 14.27570894  |
| 4.51E-08    | 11.49448811  |
| 4.51E-11    | 18.83662435  |
| 3.74E-06    | 6.856576215  |
| 5.67E-09    | 13.6727977   |
| 1.49E-08    | 12.65675715  |
| 1.21E-17    | 36.6604757   |
| 2.32E-13    | 24.64583627  |
| 6.52E-06    | 6.263257097  |
| 4.40E-13    | 23.93555623  |

|             |              |
|-------------|--------------|
| 5.40E-07    | 8.879980396  |
| 0.008526848 | -1.441091115 |
| 9.28E-08    | 10.7376932   |
| 1.96E-07    | 9.950666235  |
| 4.25E-06    | 6.719697561  |
| 1.09E-10    | 17.88947889  |
| 6.93E-13    | 23.42664511  |
| 2.41E-09    | 14.59251039  |
| 1.13E-08    | 12.94382675  |
| 1.31E-07    | 10.36989206  |
| 6.49E-10    | 15.97194409  |
| 2.67E-06    | 7.212470505  |
| 2.08E-12    | 22.21857067  |
| 3.25E-09    | 14.27265107  |
| 1.76E-08    | 12.48258635  |
| 2.05E-10    | 17.19891859  |
| 8.38E-13    | 23.21058243  |
| 1.20E-11    | 20.27419006  |
| 3.86E-12    | 21.53661855  |
| 4.36E-09    | 13.95977485  |
| 1.29E-10    | 17.71723957  |
| 9.32E-12    | 20.56942393  |
| 1.59E-16    | 33.22389264  |
| 1.36E-10    | 17.64962187  |
| 4.13E-12    | 21.45800804  |
| 5.16E-10    | 16.21202384  |
| 1.11E-10    | 17.86765054  |
| 2.19E-14    | 27.33397033  |
| 4.18E-08    | 11.57703949  |
| 3.19E-08    | 11.86249334  |
| 2.65E-11    | 19.40188299  |
| 3.93E-07    | 9.21221705   |
| 5.21E-12    | 21.20249498  |
| 6.64E-14    | 26.05208816  |
| 1.10E-11    | 20.37992234  |
| 2.83E-10    | 16.85575736  |
| 1.52E-10    | 17.52811912  |
| 4.93E-14    | 26.41507341  |
| 8.03E-12    | 20.73064396  |
| 2.36E-10    | 17.05120678  |
| 1.55E-12    | 22.52976297  |
| 4.99E-05    | 4.089989558  |
| 1.96E-10    | 17.25312408  |
| 1.47E-09    | 15.10847836  |
| 1.61E-06    | 7.740185921  |
| 8.80E-06    | 5.943492392  |
| 2.57E-09    | 14.52494299  |
| 3.92E-12    | 21.51611263  |
| 1.42E-11    | 20.08960332  |
| 7.94E-11    | 18.2286218   |
| 2.53E-09    | 14.54123798  |
| 5.60E-05    | 3.963914075  |
| 3.73E-13    | 24.12779081  |

|             |              |
|-------------|--------------|
| 5.23E-12    | 21.19555054  |
| 5.93E-12    | 21.05565675  |
| 0.041662832 | -3.198711565 |
| 3.05E-09    | 14.34435173  |
| 6.04E-10    | 16.0472361   |
| 8.89E-13    | 23.14313919  |
| 1.25E-06    | 7.996817882  |
| 1.09E-14    | 28.15710169  |
| 4.77E-09    | 13.85886627  |
| 1.75E-11    | 19.86898742  |
| 2.48E-14    | 27.18513368  |
| 4.44E-09    | 13.94178849  |
| 0.001370627 | 0.539478374  |
| 3.70E-09    | 14.13895502  |
| 2.03E-15    | 30.15054398  |
| 6.54E-09    | 13.51643679  |
| 7.59E-12    | 20.79174303  |
| 2.35E-12    | 22.08095676  |
| 0.000249099 | 2.36971486   |
| 1.00E-09    | 15.50713409  |
| 0.049066249 | -3.384561659 |
| 1.36E-13    | 25.23299408  |
| 1.09E-07    | 10.57052252  |
| 8.54E-10    | 15.67705884  |
| 2.39E-11    | 19.52547525  |
| 1.36E-16    | 33.45317131  |
| 2.48E-14    | 27.17976947  |
| 7.65E-09    | 13.35024964  |
| 1.60E-12    | 22.49056422  |
| 1.61E-15    | 30.42747007  |
| 2.91E-11    | 19.30854199  |
| 0.000431278 | 1.779000463  |
| 7.82E-10    | 15.76982834  |
| 1.68E-14    | 27.65549115  |
| 4.32E-09    | 13.96935097  |
| 3.84E-13    | 24.09424508  |
| 1.25E-15    | 30.70377229  |
| 2.60E-08    | 12.07601859  |
| 1.10E-09    | 15.41001505  |
| 1.16E-09    | 15.3557601   |
| 6.93E-13    | 23.42493817  |
| 1.07E-08    | 12.9985539   |
| 2.37E-15    | 29.94977021  |
| 0.001275676 | 0.615352908  |
| 4.13E-10    | 16.45607885  |
| 6.82E-06    | 6.212473649  |
| 3.52E-07    | 9.329063374  |
| 1.98E-10    | 17.23988654  |
| 1.35E-09    | 15.20470482  |
| 6.53E-13    | 23.48688169  |
| 1.97E-09    | 14.80002009  |
| 3.28E-12    | 21.71778307  |
| 1.52E-10    | 17.53188414  |

|             |              |
|-------------|--------------|
| 2.35E-05    | 4.904509895  |
| 2.09E-10    | 17.18005171  |
| 5.45E-08    | 11.2909138   |
| 9.23E-10    | 15.59348719  |
| 2.54E-15    | 29.85401819  |
| 1.04E-13    | 25.53325446  |
| 0.000491701 | 1.636708147  |
| 1.42E-15    | 30.55969312  |
| 8.32E-14    | 25.79457195  |
| 2.86E-09    | 14.41202496  |
| 8.81E-11    | 18.11886939  |
| 9.35E-08    | 10.72995493  |
| 3.22E-15    | 29.57904855  |
| 4.29E-10    | 16.41392555  |
| 1.50E-14    | 27.80234124  |
| 2.49E-08    | 12.12459887  |
| 3.58E-11    | 19.08622886  |
| 7.12E-15    | 28.59857671  |
| 1.41E-11    | 20.09887928  |
| 2.60E-11    | 19.42456592  |
| 7.86E-11    | 18.24267279  |
| 2.82E-11    | 19.34004188  |
| 1.91E-11    | 19.77727984  |
| 6.22E-12    | 21.00027421  |
| 1.14E-07    | 10.51912732  |
| 2.26E-14    | 27.28394859  |
| 4.16E-09    | 14.01007596  |
| 5.00E-09    | 13.80761097  |
| 8.10E-13    | 23.25040836  |
| 1.44E-16    | 33.33417975  |
| 1.50E-12    | 22.57204548  |
| 1.29E-10    | 17.71320143  |
| 9.85E-17    | 33.99259916  |
| 3.28E-14    | 26.88015332  |
| 6.01E-14    | 26.18006098  |
| 3.46E-05    | 4.487857221  |
| 2.30E-14    | 27.26481538  |
| 7.35E-08    | 10.98269437  |
| 6.92E-15    | 28.64937769  |
| 4.12E-06    | 6.753744847  |
| 2.14E-16    | 32.80925564  |
| 4.48E-08    | 11.5022741   |
| 1.08E-12    | 22.93940682  |
| 0.00250347  | -0.108047851 |
| 1.87E-07    | 10.00125092  |
| 5.26E-09    | 13.75385943  |
| 4.24E-12    | 21.43032328  |
| 1.32E-11    | 20.16940652  |
| 1.55E-11    | 20.00147356  |
| 4.07E-14    | 26.62424654  |
| 2.77E-10    | 16.87836243  |
| 2.62E-10    | 16.9402205   |
| 7.24E-11    | 18.32880021  |

|             |             |
|-------------|-------------|
| 2.78E-12    | 21.89683225 |
| 2.28E-15    | 30.00378008 |
| 2.71E-07    | 9.600795217 |
| 2.23E-18    | 38.80000818 |
| 1.79E-15    | 30.3190304  |
| 1.42E-16    | 33.35679605 |
| 2.28E-09    | 14.64927635 |
| 0.002990909 | -0.30160924 |
| 3.46E-05    | 4.487493704 |
| 2.61E-05    | 4.787427665 |
| 1.62E-09    | 15.00580327 |
| 1.09E-10    | 17.88508347 |
| 1.53E-14    | 27.75689185 |
| 6.01E-14    | 26.18263068 |
| 6.14E-13    | 23.55549568 |
| 3.35E-11    | 19.15799123 |
| 4.77E-09    | 13.85968974 |
| 6.85E-14    | 26.01366731 |
| 1.73E-14    | 27.61900354 |
| 7.92E-10    | 15.75680778 |
| 2.29E-10    | 17.08725784 |
| 6.58E-10    | 15.95575152 |
| 0.0002333   | 2.441064585 |
| 3.52E-10    | 16.62394699 |
| 1.49E-10    | 17.55809989 |
| 3.61E-07    | 9.300279838 |
| 1.98E-10    | 17.24062069 |
| 4.14E-08    | 11.58770874 |
| 9.73E-05    | 3.372825601 |
| 1.48E-17    | 36.28422801 |
| 4.23E-13    | 23.98465715 |
| 9.70E-14    | 25.62468467 |
| 4.97E-05    | 4.096591071 |
| 6.66E-11    | 18.41887887 |
| 2.95E-05    | 4.657463975 |
| 9.35E-11    | 18.05396478 |
| 1.67E-13    | 25.02111266 |
| 1.62E-13    | 25.05947694 |
| 5.53E-12    | 21.13121475 |
| 1.26E-16    | 33.61263223 |
| 3.13E-13    | 24.32709351 |
| 4.23E-10    | 16.42781802 |
| 4.83E-18    | 37.78986617 |
| 1.15E-13    | 25.42542564 |
| 1.17E-11    | 20.30200797 |
| 2.34E-17    | 35.69461189 |
| 7.17E-19    | 40.58528976 |
| 4.06E-07    | 9.177877892 |
| 1.33E-15    | 30.63214283 |
| 3.29E-09    | 14.2610549  |
| 1.18E-12    | 22.8329265  |
| 7.30E-14    | 25.94265284 |
| 4.25E-12    | 21.42761694 |

|          |             |
|----------|-------------|
| 2.54E-12 | 21.99431364 |
| 3.63E-08 | 11.7199966  |
| 4.13E-11 | 18.93362921 |
| 3.61E-14 | 26.76880217 |
| 4.08E-15 | 29.30553755 |
| 5.69E-08 | 11.24785399 |
| 4.01E-14 | 26.6422948  |
| 5.14E-11 | 18.69336983 |
| 7.28E-16 | 31.35165784 |
| 1.34E-14 | 27.93147996 |
| 4.07E-13 | 24.02379413 |
| 1.23E-13 | 25.34786363 |
| 1.96E-08 | 12.37330629 |
| 5.40E-12 | 21.15489115 |
| 9.87E-11 | 17.99499611 |
| 4.18E-07 | 9.146555247 |
| 4.52E-09 | 13.92146804 |
| 3.16E-12 | 21.76383687 |
| 3.86E-16 | 32.09397152 |
| 2.01E-12 | 22.25903165 |
| 2.07E-10 | 17.1895667  |
| 7.67E-14 | 25.89148213 |
| 4.38E-08 | 11.52714984 |
| 1.49E-12 | 22.57836878 |
| 9.89E-16 | 30.94423415 |
| 6.97E-15 | 28.63788805 |
| 2.00E-11 | 19.72674013 |
| 1.19E-11 | 20.28148779 |
| 4.50E-10 | 16.35970408 |
| 1.91E-14 | 27.50447409 |
| 1.63E-16 | 33.18247779 |
| 1.53E-14 | 27.75505037 |
| 8.88E-10 | 15.63559261 |
| 9.47E-05 | 3.402332649 |
| 6.58E-15 | 28.73053724 |
| 1.42E-08 | 12.70610698 |
| 2.45E-10 | 17.00983476 |
| 3.63E-09 | 14.15849575 |
| 4.25E-09 | 13.99003145 |
| 5.92E-09 | 13.62455786 |
| 2.19E-12 | 22.16095822 |
| 3.84E-10 | 16.53082706 |
| 1.21E-10 | 17.78383282 |
| 8.74E-11 | 18.12908617 |
| 8.32E-09 | 13.26191812 |
| 4.63E-14 | 26.48881951 |
| 6.14E-13 | 23.55261314 |
| 1.48E-17 | 36.27613411 |
| 6.13E-11 | 18.50724184 |
| 1.50E-12 | 22.57045867 |
| 4.57E-10 | 16.34084044 |
| 4.66E-12 | 21.32886285 |
| 3.43E-13 | 24.21979384 |



|             |             |
|-------------|-------------|
| 6.29E-15    | 28.78332507 |
| 4.43E-11    | 18.85774616 |
| 3.25E-07    | 9.413454807 |
| 3.31E-09    | 14.25227908 |
| 1.70E-13    | 24.9963582  |
| 5.14E-08    | 11.35743957 |
| 1.95E-15    | 30.19726476 |
| 1.91E-14    | 27.50109625 |
| 8.74E-12    | 20.64164496 |
| 0.000118424 | 3.168230559 |
| 3.93E-11    | 18.98411971 |
| 1.22E-08    | 12.86639504 |
| 4.43E-11    | 18.85746855 |
| 4.95E-06    | 6.554761821 |
| 5.47E-17    | 34.69204225 |
| 5.19E-10    | 16.20608524 |
| 1.80E-09    | 14.89444637 |
| 4.03E-06    | 6.779118233 |
| 1.04E-06    | 8.199253545 |
| 2.61E-08    | 12.07347738 |
| 3.05E-12    | 21.80153325 |
| 5.58E-09    | 13.69048674 |
| 3.02E-10    | 16.78243304 |
| 4.84E-12    | 21.28684212 |
| 1.14E-11    | 20.33326764 |
| 5.26E-12    | 21.1853937  |
| 1.47E-12    | 22.59770417 |
| 5.03E-08    | 11.38223898 |
| 2.35E-11    | 19.54502025 |
| 7.93E-13    | 23.27525622 |
| 8.96E-14    | 25.71310632 |
| 6.16E-16    | 31.56223051 |
| 2.32E-11    | 19.55867621 |
| 4.67E-15    | 29.13240705 |
| 6.85E-10    | 15.91241954 |
| 2.14E-14    | 27.36398141 |
| 2.17E-17    | 35.85446322 |
| 1.57E-10    | 17.49506047 |
| 5.12E-11    | 18.69955382 |
| 3.22E-15    | 29.56812667 |
| 1.26E-09    | 15.27003365 |
| 1.35E-17    | 36.47230822 |
| 7.65E-16    | 31.27264946 |
| 4.19E-16    | 31.98732467 |
| 3.08E-05    | 4.611321117 |
| 1.99E-10    | 17.23478958 |
| 1.57E-10    | 17.49422377 |
| 1.43E-06    | 7.859427386 |
| 0.000776401 | 1.154483451 |
| 4.69E-09    | 13.87989839 |
| 1.14E-18    | 39.80177405 |
| 7.10E-12    | 20.8607763  |
| 4.88E-16    | 31.81272675 |

|             |              |
|-------------|--------------|
| 2.77E-14    | 27.06161139  |
| 2.19E-11    | 19.62655488  |
| 2.02E-07    | 9.918168757  |
| 1.57E-14    | 27.72754502  |
| 1.52E-09    | 15.07219995  |
| 1.23E-17    | 36.61856827  |
| 2.77E-11    | 19.35627323  |
| 3.86E-11    | 19.00465637  |
| 5.25E-14    | 26.34305963  |
| 9.85E-17    | 34.01172618  |
| 7.56E-06    | 6.102736865  |
| 6.15E-06    | 6.327906685  |
| 8.99E-13    | 23.12841221  |
| 2.48E-12    | 22.01829186  |
| 1.14E-15    | 30.7962747   |
| 0.000137557 | 3.008271538  |
| 0.008749732 | -1.470377009 |
| 2.51E-10    | 16.98475757  |
| 3.77E-07    | 9.257249112  |
| 4.23E-10    | 16.42869267  |
| 4.37E-13    | 23.94743692  |
| 6.88E-10    | 15.90612383  |
| 1.03E-09    | 15.48203412  |
| 1.35E-16    | 33.46783843  |
| 2.99E-15    | 29.66789366  |
| 1.25E-11    | 20.22725392  |
| 4.71E-08    | 11.45183836  |
| 4.32E-13    | 23.96275715  |
| 2.54E-11    | 19.45515996  |
| 1.10E-12    | 22.90921698  |
| 1.35E-17    | 36.47831479  |
| 1.06E-10    | 17.91844111  |
| 9.08E-14    | 25.69728184  |
| 5.65E-19    | 41.0356339   |
| 5.11E-08    | 11.36309203  |
| 1.99E-12    | 22.26722337  |
| 4.09E-07    | 9.168745304  |
| 1.11E-19    | 43.58512545  |
| 7.59E-11    | 18.28061402  |
| 1.81E-10    | 17.33777209  |
| 1.90E-06    | 7.563911582  |
| 3.24E-10    | 16.70662673  |
| 8.15E-09    | 13.28227578  |
| 5.24E-13    | 23.73717888  |
| 0.031001818 | -2.864603277 |
| 1.18E-13    | 25.40229012  |
| 1.28E-11    | 20.2036402   |
| 5.23E-12    | 21.19468106  |
| 4.54E-11    | 18.82699096  |
| 9.60E-16    | 31.001495    |
| 1.06E-06    | 8.178665462  |
| 8.37E-13    | 23.21420614  |
| 9.86E-16    | 30.96128434  |

|             |              |
|-------------|--------------|
| 2.08E-15    | 30.11272874  |
| 8.89E-13    | 23.14108653  |
| 0.001197257 | 0.68336655   |
| 0.00027763  | 2.251247573  |
| 3.21E-13    | 24.29588675  |
| 0.002460443 | -0.090617051 |
| 8.23E-10    | 15.71618405  |
| 0.005354794 | -0.929466129 |
| 1.68E-16    | 33.11747764  |
| 4.04E-16    | 32.04052721  |
| 1.65E-10    | 17.44158895  |
| 2.95E-08    | 11.94428031  |
| 3.71E-10    | 16.56936273  |
| 2.96E-10    | 16.80562082  |
| 1.03E-13    | 25.55076346  |
| 7.84E-09    | 13.32247943  |
| 1.09E-16    | 33.82545145  |
| 3.79E-14    | 26.70817858  |
| 1.06E-14    | 28.20543325  |
| 1.07E-14    | 28.18789556  |
| 1.20E-12    | 22.81180731  |
| 1.46E-17    | 36.36527535  |
| 8.36E-10    | 15.70067262  |
| 2.21E-12    | 22.14562427  |
| 1.70E-05    | 5.252814473  |
| 1.69E-13    | 25.0034959   |
| 3.55E-08    | 11.74474735  |
| 1.35E-14    | 27.91542625  |
| 1.53E-14    | 27.76206534  |
| 2.78E-12    | 21.90042613  |
| 3.22E-12    | 21.73875629  |
| 2.36E-17    | 35.66549032  |
| 8.89E-13    | 23.14451854  |
| 0.000242602 | 2.398445038  |
| 5.75E-15    | 28.88510875  |
| 2.09E-15    | 30.09700839  |
| 2.13E-16    | 32.8223353   |
| 4.21E-08    | 11.56880697  |
| 8.44E-12    | 20.67961901  |
| 4.78E-18    | 37.83964319  |
| 1.27E-09    | 15.26147466  |
| 1.09E-12    | 22.92811229  |
| 1.66E-10    | 17.43219988  |
| 1.11E-13    | 25.4663645   |
| 3.00E-07    | 9.496958913  |
| 3.71E-18    | 38.12596613  |
| 1.02E-13    | 25.57015791  |
| 2.07E-13    | 24.76889566  |
| 2.02E-10    | 17.21678953  |
| 4.13E-07    | 9.160137805  |
| 3.38E-14    | 26.83760701  |
| 3.27E-05    | 4.547547289  |
| 9.40E-09    | 13.13644968  |

|             |              |
|-------------|--------------|
| 3.88E-15    | 29.36568545  |
| 2.37E-15    | 29.95841424  |
| 1.03E-11    | 20.45646909  |
| 1.09E-05    | 5.715314776  |
| 2.46E-11    | 19.49126663  |
| 1.24E-12    | 22.77748757  |
| 2.37E-15    | 29.94772033  |
| 1.24E-18    | 39.50550029  |
| 2.34E-17    | 35.70593151  |
| 0.020157106 | -2.388026041 |
| 3.58E-15    | 29.45445891  |
| 1.34E-05    | 5.500262819  |
| 0.000449182 | 1.733597389  |
| 2.07E-13    | 24.76777187  |
| 4.81E-15    | 29.0937094   |
| 1.48E-06    | 7.827664351  |
| 8.08E-14    | 25.83138325  |
| 4.12E-06    | 6.756494436  |
| 2.87E-19    | 41.8259816   |
| 1.45E-11    | 20.07127441  |
| 1.97E-09    | 14.80213652  |
| 1.79E-13    | 24.93282235  |
| 7.25E-18    | 37.25517739  |
| 6.70E-15    | 28.69964261  |
| 7.45E-06    | 6.120381698  |
| 1.24E-18    | 39.47637276  |
| 1.64E-13    | 25.04242103  |
| 8.25E-14    | 25.80501242  |
| 5.54E-15    | 28.93612822  |
| 2.18E-09    | 14.69548813  |
| 2.00E-08    | 12.34910884  |
| 4.72E-08    | 11.44766808  |
| 1.45E-14    | 27.8367719   |
| 2.89E-18    | 38.47601388  |
| 2.08E-14    | 27.40470096  |
| 7.17E-19    | 40.59731791  |
| 1.02E-18    | 39.98064862  |
| 3.32E-13    | 24.25970476  |
| 1.65E-10    | 17.4383686   |
| 8.04E-14    | 25.8395788   |
| 9.67E-11    | 18.01624893  |
| 1.12E-11    | 20.35622779  |
| 1.17E-16    | 33.72490063  |
| 3.75E-15    | 29.40330394  |
| 2.29E-08    | 12.21020487  |
| 8.17E-14    | 25.81764449  |
| 3.53E-13    | 24.18543423  |
| 4.03E-07    | 9.185683106  |
| 6.87E-10    | 15.90871569  |
| 2.46E-11    | 19.48840123  |
| 6.49E-06    | 6.270675727  |
| 5.41E-18    | 37.5980386   |
| 6.28E-14    | 26.12814205  |

|             |             |
|-------------|-------------|
| 1.56E-10    | 17.50060405 |
| 1.10E-11    | 20.37645021 |
| 3.54E-11    | 19.09781006 |
| 1.97E-13    | 24.82311649 |
| 8.42E-08    | 10.8415261  |
| 2.99E-15    | 29.66459578 |
| 6.22E-12    | 21.00015412 |
| 2.05E-16    | 32.8813634  |
| 1.41E-16    | 33.38968619 |
| 2.60E-11    | 19.42954696 |
| 4.49E-15    | 29.17720923 |
| 2.28E-09    | 14.6466318  |
| 5.35E-11    | 18.64607446 |
| 5.30E-14    | 26.33144973 |
| 6.26E-16    | 31.52970292 |
| 3.50E-12    | 21.64417211 |
| 2.62E-05    | 4.785670469 |
| 1.19E-07    | 10.47478693 |
| 2.39E-15    | 29.93028944 |
| 1.25E-11    | 20.23432405 |
| 4.02E-15    | 29.32540935 |
| 1.68E-08    | 12.52932907 |
| 1.18E-13    | 25.39850399 |
| 2.89E-18    | 38.45454011 |
| 0.00053746  | 1.544387121 |
| 5.39E-10    | 16.1638938  |
| 1.31E-13    | 25.27611675 |
| 6.03E-09    | 13.60417309 |
| 5.50E-14    | 26.28204648 |
| 1.67E-11    | 19.92358058 |
| 2.76E-14    | 27.06773696 |
| 3.83E-16    | 32.11022812 |
| 1.91E-14    | 27.49918658 |
| 4.01E-12    | 21.49196201 |
| 2.96E-10    | 16.80844743 |
| 4.98E-05    | 4.09249484  |
| 2.48E-12    | 22.0212776  |
| 2.95E-16    | 32.43782794 |
| 1.03E-11    | 20.45862999 |
| 2.08E-14    | 27.40650659 |
| 5.55E-11    | 18.60690697 |
| 4.90E-16    | 31.79370485 |
| 9.55E-13    | 23.06725449 |
| 1.12E-11    | 20.3617688  |
| 1.91E-14    | 27.50095628 |
| 5.73E-13    | 23.63791434 |
| 0.000944905 | 0.943970506 |
| 1.35E-16    | 33.47011237 |
| 3.73E-17    | 35.13779207 |
| 1.53E-14    | 27.77379368 |
| 4.16E-08    | 11.58263045 |
| 0.000148156 | 2.9270371   |
| 4.91E-15    | 29.06922962 |

|             |              |
|-------------|--------------|
| 7.84E-05    | 3.605561147  |
| 4.81E-13    | 23.83283467  |
| 3.86E-13    | 24.08722401  |
| 2.64E-15    | 29.80242512  |
| 1.35E-12    | 22.68842445  |
| 3.52E-12    | 21.63512399  |
| 7.31E-16    | 31.32483868  |
| 8.62E-16    | 31.1280422   |
| 7.06E-16    | 31.39704359  |
| 8.31E-18    | 37.089523    |
| 1.02E-05    | 5.782445814  |
| 2.92E-13    | 24.40244319  |
| 6.18E-17    | 34.52100426  |
| 4.95E-15    | 29.05689512  |
| 2.91E-13    | 24.40617741  |
| 2.24E-12    | 22.12917755  |
| 6.41E-15    | 28.7606317   |
| 4.41E-16    | 31.92128972  |
| 5.50E-14    | 26.28245508  |
| 2.41E-16    | 32.65178397  |
| 1.33E-10    | 17.67418771  |
| 3.17E-16    | 32.34846358  |
| 1.36E-10    | 17.65548647  |
| 6.25E-14    | 26.1392487   |
| 7.70E-10    | 15.78658329  |
| 5.41E-18    | 37.57368703  |
| 4.67E-13    | 23.87229348  |
| 1.29E-13    | 25.29541128  |
| 1.59E-10    | 17.48072416  |
| 3.22E-07    | 9.423029325  |
| 3.45E-12    | 21.65766742  |
| 8.33E-18    | 37.05666244  |
| 2.20E-14    | 27.32749306  |
| 1.84E-05    | 5.162871003  |
| 1.29E-13    | 25.30010465  |
| 3.79E-12    | 21.55652779  |
| 3.38E-14    | 26.8368265   |
| 4.24E-15    | 29.24373035  |
| 1.78E-14    | 27.58848657  |
| 7.69E-14    | 25.88588841  |
| 4.29E-09    | 13.97813226  |
| 6.64E-14    | 26.05213649  |
| 1.06E-16    | 33.88398521  |
| 0.016078809 | -2.138560044 |
| 2.44E-17    | 35.61023438  |
| 4.25E-14    | 26.5783752   |
| 1.72E-17    | 36.10932023  |
| 2.32E-13    | 24.64965138  |
| 3.00E-08    | 11.92782735  |
| 9.58E-12    | 20.53960936  |
| 2.46E-14    | 27.19348186  |
| 1.91E-08    | 12.39918074  |
| 2.24E-11    | 19.59798362  |

|             |             |
|-------------|-------------|
| 1.70E-16    | 33.09333772 |
| 8.77E-12    | 20.63635581 |
| 2.27E-17    | 35.77481619 |
| 0.001431972 | 0.49331536  |
| 2.94E-13    | 24.39241466 |
| 1.78E-09    | 14.90591735 |
| 5.04E-11    | 18.71592469 |
| 5.88E-08    | 11.21331408 |
| 5.68E-17    | 34.63685027 |
| 2.91E-13    | 24.4095019  |
| 2.82E-07    | 9.562110095 |
| 1.63E-16    | 33.1931569  |
| 1.64E-16    | 33.15960531 |
| 2.85E-16    | 32.4786107  |
| 1.12E-12    | 22.88671114 |
| 1.44E-11    | 20.07840451 |
| 5.41E-18    | 37.58575271 |
| 6.86E-07    | 8.631793122 |
| 2.11E-11    | 19.66774243 |
| 1.11E-12    | 22.8971536  |
| 4.19E-16    | 31.98914443 |
| 6.56E-12    | 20.94139642 |
| 1.23E-10    | 17.76068735 |
| 2.43E-12    | 22.04624751 |
| 5.48E-13    | 23.69013282 |
| 6.81E-15    | 28.6737514  |
| 3.47E-16    | 32.2335317  |
| 2.15E-09    | 14.70860231 |
| 1.08E-14    | 28.17545312 |
| 6.18E-16    | 31.55059874 |
| 6.88E-08    | 11.05403437 |
| 1.77E-08    | 12.47710019 |
| 4.40E-17    | 34.92539732 |
| 1.09E-13    | 25.48491711 |
| 6.97E-14    | 25.99307218 |
| 2.14E-08    | 12.28151316 |
| 7.87E-16    | 31.22387678 |
| 1.10E-12    | 22.90832175 |
| 0.000242862 | 2.397198261 |
| 4.95E-07    | 8.972460315 |
| 3.95E-09    | 14.06751584 |
| 1.06E-10    | 17.91474471 |
| 1.43E-10    | 17.60043851 |
| 6.60E-15    | 28.72337328 |
| 8.17E-15    | 28.4602846  |
| 9.12E-10    | 15.6075821  |
| 2.15E-09    | 14.70954937 |
| 5.68E-10    | 16.11213567 |
| 9.89E-08    | 10.67019019 |
| 6.15E-06    | 6.328690908 |
| 1.92E-15    | 30.21940722 |
| 1.86E-13    | 24.88739498 |
| 5.57E-15    | 28.92703278 |

|             |              |
|-------------|--------------|
| 4.01E-12    | 21.49105955  |
| 1.88E-15    | 30.25086005  |
| 3.17E-16    | 32.34126718  |
| 9.61E-07    | 8.275406917  |
| 1.47E-17    | 36.33310616  |
| 7.14E-12    | 20.85233505  |
| 1.53E-14    | 27.75939591  |
| 3.73E-14    | 26.72601619  |
| 1.07E-14    | 28.18466341  |
| 3.38E-16    | 32.26601861  |
| 1.23E-10    | 17.76194192  |
| 4.77E-13    | 23.8452744   |
| 1.43E-09    | 15.14069027  |
| 9.24E-07    | 8.316027827  |
| 8.18E-20    | 44.27570711  |
| 6.82E-07    | 8.639204721  |
| 4.10E-15    | 29.29654218  |
| 2.51E-07    | 9.680788098  |
| 8.87E-17    | 34.13547152  |
| 2.27E-17    | 35.76673795  |
| 2.86E-08    | 11.97791473  |
| 5.00E-13    | 23.79200849  |
| 3.22E-15    | 29.57418739  |
| 3.06E-14    | 26.95864082  |
| 1.02E-16    | 33.93160458  |
| 0.012860478 | -1.890302352 |
| 1.07E-12    | 22.94643975  |
| 2.14E-14    | 27.37340818  |
| 1.14E-14    | 28.10854795  |
| 9.64E-12    | 20.53044246  |
| 5.78E-14    | 26.23103769  |
| 3.91E-12    | 21.52083242  |
| 6.61E-15    | 28.71691829  |
| 1.62E-10    | 17.46199745  |
| 4.66E-12    | 21.32569773  |
| 1.59E-09    | 15.02329239  |
| 4.16E-09    | 14.01185007  |
| 1.42E-16    | 33.35834655  |
| 3.61E-16    | 32.17547412  |
| 1.91E-15    | 30.2315977   |
| 1.02E-11    | 20.47132346  |
| 1.19E-16    | 33.69844133  |
| 2.54E-15    | 29.85471928  |
| 2.78E-14    | 27.05234212  |
| 1.35E-14    | 27.91736401  |
| 7.31E-16    | 31.32512441  |
| 3.58E-11    | 19.08391762  |
| 1.24E-18    | 39.57245706  |
| 0.000253773 | 2.349576928  |
| 1.39E-16    | 33.41457437  |
| 6.16E-11    | 18.50007395  |
| 3.31E-11    | 19.17085547  |
| 4.53E-10    | 16.35170783  |



|             |              |
|-------------|--------------|
| 3.17E-16    | 32.33833642  |
| 0.004024346 | -0.623708116 |
| 9.12E-16    | 31.06543637  |
| 4.24E-15    | 29.24167334  |
| 8.95E-11    | 18.10131432  |
| 8.18E-20    | 44.6005903   |
| 1.20E-13    | 25.37828153  |
| 9.27E-19    | 40.15575532  |
| 8.02E-13    | 23.26145945  |
| 0.017511968 | -2.231275601 |
| 1.35E-16    | 33.50288724  |
| 1.67E-16    | 33.13410811  |
| 1.35E-16    | 33.47625177  |
| 7.69E-09    | 13.34373879  |
| 1.40E-12    | 22.64672034  |
| 1.28E-07    | 10.39734756  |
| 1.14E-11    | 20.33416614  |
| 5.65E-12    | 21.10654105  |
| 5.05E-13    | 23.7784676   |
| 1.79E-13    | 24.93599835  |
| 2.06E-15    | 30.13157883  |
| 4.71E-09    | 13.87210752  |
| 6.56E-12    | 20.94096315  |
| 6.59E-14    | 26.07188821  |
| 2.06E-08    | 12.31876796  |
| 6.67E-14    | 26.04175223  |
| 1.80E-15    | 30.30516647  |
| 2.68E-10    | 16.91459316  |
| 1.47E-12    | 22.59706472  |
| 1.12E-06    | 8.121364307  |
| 2.04E-13    | 24.78654232  |
| 1.10E-10    | 17.88069339  |
| 2.99E-07    | 9.500841261  |
| 8.76E-14    | 25.73811581  |
| 1.81E-09    | 14.88320626  |
| 4.40E-13    | 23.93535049  |
| 5.13E-15    | 29.0168675   |
| 1.38E-11    | 20.12281804  |
| 6.26E-14    | 26.13441956  |
| 0.000458758 | 1.710487408  |
| 3.99E-13    | 24.04533708  |
| 6.12E-12    | 21.02046135  |
| 7.34E-17    | 34.33665019  |
| 1.91E-11    | 19.77524591  |
| 3.71E-18    | 38.14084361  |
| 2.05E-19    | 42.48465333  |
| 4.81E-15    | 29.09792515  |
| 2.40E-13    | 24.60915451  |
| 1.32E-13    | 25.27012271  |
| 3.90E-08    | 11.64947811  |
| 2.02E-12    | 22.25251004  |
| 2.48E-12    | 22.02283442  |
| 4.90E-16    | 31.79673581  |

|             |              |
|-------------|--------------|
| 3.26E-06    | 6.999595349  |
| 5.43E-06    | 6.460373369  |
| 3.30E-17    | 35.29604342  |
| 5.05E-14    | 26.38886255  |
| 3.78E-09    | 14.11299281  |
| 2.15E-07    | 9.853204028  |
| 3.88E-13    | 24.07951429  |
| 5.30E-12    | 21.17759314  |
| 2.64E-10    | 16.93235415  |
| 2.65E-11    | 19.40157106  |
| 0.005320026 | -0.923319323 |
| 8.76E-11    | 18.12502807  |
| 1.94E-08    | 12.38101277  |
| 2.84E-13    | 24.43616255  |
| 1.65E-06    | 7.708142602  |
| 2.14E-14    | 27.36794655  |
| 6.78E-15    | 28.68212471  |
| 1.15E-06    | 8.090190582  |
| 1.24E-18    | 39.57697202  |
| 2.31E-07    | 9.772765362  |
| 1.62E-19    | 42.92907825  |
| 3.93E-07    | 9.212556528  |
| 9.86E-16    | 30.96670197  |
| 3.36E-14    | 26.85327981  |
| 4.27E-17    | 34.98815207  |
| 1.67E-11    | 19.91840099  |
| 3.53E-16    | 32.20527075  |
| 6.48E-09    | 13.52917659  |
| 8.21E-11    | 18.19233782  |
| 6.51E-09    | 13.52207395  |
| 8.89E-13    | 23.14807363  |
| 3.90E-12    | 21.52638368  |
| 3.60E-09    | 14.16797461  |
| 2.75E-06    | 7.178762381  |
| 1.19E-12    | 22.82404961  |
| 3.65E-14    | 26.75009105  |
| 5.96E-12    | 21.04819113  |
